# Supplementary material for: Maternal Exposure to Criteria Air Pollutants and Congenital Heart Defects in Offspring: Results from the National Birth Defects Prevention Study
Source: PubMed Central journal article supplement (PMC4123026; doi:10.1289/ehp.1307289), 2014-04-11
Supplement: ehp.1307289.s001.pdf [file ehp.1307289.s001.pdf]

## Supplemental Material

# Maternal Exposure to Criteria Air Pollutants and Congenital Heart Defects in Offspring: Results from the National Birth Defects Prevention Study

Jeanette A. Stingone, Thomas J. Luben, Julie L. Daniels, Montserrat Fuentes, David B. Richardson, Arthur S. Aylsworth, Amy H. Herring, Marlene Anderka, Lorenzo Botto, Adolfo Correa, Suzanne M. Gilboa, Peter H. Langlois, Bridget Mosley, Gary M. Shaw, Csaba Siffel, Andrew F. Olshan, and the National Birth Defects Prevention Study

| <b>Table of Contents</b>                                                                                                                                                                                                                                                                           | <b>Page</b> |
|----------------------------------------------------------------------------------------------------------------------------------------------------------------------------------------------------------------------------------------------------------------------------------------------------|-------------|
| <b>Table S1:</b> Ratios used to control for differences in case ascertainment, National Birth Defects Prevention Study, 1997-2006.                                                                                                                                                                 | 1           |
| <b>Table S2:</b> Adjusted odds ratios and 95% confidence intervals between congenital heart defects and 7-week average exposure to criteria air pollutants, National Birth Defects Prevention Study, 1997-2006.                                                                                    | 2           |
| <b>Table S3:</b> Adjusted odds ratios and 95% confidence intervals between congenital heart defects and 7-week exposure to nitrogen dioxide and particulate matter by distance to major road ( $\leq 50$ km or $> 50$ km), National Birth Defects Prevention Study, 1997-2006.                     | 7           |
| <b>Table S4:</b> Adjusted odds ratios and 95% confidence intervals between congenital heart defects and weekly exposure to criteria air pollutants from hierarchical models, National Birth Defects Prevention Study, 1997-2006. <sup>a</sup>                                                      | 9           |
| <b>Table S5:</b> Adjusted odds ratios and 95% confidence intervals between congenital heart defects and pollutant factors identified through principal components analysis, National Birth Defects Prevention Study, 1999-2006.                                                                    | 30          |
| <b>Table S6:</b> Adjusted <sup>a</sup> odds ratios and 95% confidence intervals between congenital heart defects and 7-week average exposure to criteria air pollutants among participants who lived within 10 km of a stationary air monitor, National Birth Defects Prevention Study, 1997-2006. | 31          |

**Table S1:** Ratios used to control for differences in case ascertainment, National Birth Defects Prevention Study, 1997-2006.

| <b>Study Center</b> | <b>Ratio of Septal Cases to Total Congenital Heart Defect Cases<sup>a</sup></b> |
|---------------------|---------------------------------------------------------------------------------|
| Arkansas            | 0.495                                                                           |
| California          | 0.233                                                                           |
| Iowa                | 0.359                                                                           |
| Massachusetts       | 0.341                                                                           |
| Metro Atlanta       | 0.400                                                                           |
| New York            | 0.306                                                                           |
| North Carolina      | 0.358                                                                           |
| Texas               | 0.601                                                                           |
| Utah                | 0.307                                                                           |

<sup>a</sup>Ratios calculated using the population of all simple, isolated congenital heart cases within the National Birth Defects Prevention Study from 1997-2006.

**Table S2:** Adjusted odds ratios and 95% confidence intervals between congenital heart defects and 7-week average exposure to criteria air pollutants, National Birth Defects Prevention Study, 1997-2006.<sup>a</sup>

| Defects                                  | <10 <sup>th</sup> centile | 10 <sup>th</sup> centile-<br><50 <sup>th</sup> centile | 50 <sup>th</sup> centile-<br><90 <sup>th</sup> centile | ≥90 <sup>th</sup> centile |
|------------------------------------------|---------------------------|--------------------------------------------------------|--------------------------------------------------------|---------------------------|
| <b>Carbon Monoxide</b>                   |                           |                                                        |                                                        |                           |
| LVOTO <sup>b</sup>                       | 1.00                      | 1.11 (0.80,1.53)                                       | 1.11 (0.80,1.55)                                       | 0.95 (0.62,1.45)          |
| Aortic stenosis <sup>c</sup>             | 1.00                      | 0.93 (0.49,1.79)                                       | 0.94 (0.49,1.81)                                       | 0.76 (0.32,1.79)          |
| COA <sup>c</sup>                         | 1.00                      | 1.13 (0.7,1.82)                                        | 0.93 (0.57,1.52)                                       | 0.98 (0.53,1.82)          |
| HLHS <sup>c</sup>                        | 1.00                      | 1.22 (0.71,2.12)                                       | 1.50 (0.87,2.60)                                       | 1.07 (0.53,2.14)          |
| Conotruncal <sup>b</sup>                 | 1.00                      | 1.21 (0.90,1.64)                                       | 1.28 (0.94,1.73)                                       | 1.22 (0.84,1.79)          |
| d-TGA <sup>c</sup>                       | 1.00                      | 1.34 (0.81,2.22)                                       | 1.34 (0.80,2.23)                                       | 1.15 (0.61,2.19)          |
| TOF <sup>c</sup>                         | 1.00                      | 1.22 (0.81,1.83)                                       | 1.35 (0.90,2.03)                                       | 1.29 (0.78,2.14)          |
| Other conotruncals <sup>c,d</sup>        | 1.00                      | 0.96 (0.48,1.95)                                       | 0.92 (0.45,1.88)                                       | 1.08 (0.46,2.56)          |
| Common truncus <sup>e</sup>              | 1.00                      | 1.03 (0.35,3.99)                                       | 0.70 (0.22,2.82)                                       | 0.33 (0.03,2.06)          |
| DORV-TGA /other <sup>e</sup>             | 1.00                      | 1.03 (0.30,5.35)                                       | 0.88 (0.25,4.60)                                       | 1.34 (0.29,7.82)          |
| IAA TypeB/NOS <sup>e</sup>               | 1.00                      | 0.34 (0.07,2.03)                                       | 0.17 (0.02,1.27)                                       | 1.72 (0.32,10.6)          |
| VSDconovertricular <sup>e</sup>          | 1.00                      | 0.80 (0.26,3.18)                                       | 1.33 (0.45,5.15)                                       | 1.32 (0.28,6.33)          |
| APVR <sup>b</sup>                        | 1.00                      | 0.46 (0.25,0.84)                                       | 0.48 (0.26,0.88)                                       | 0.59 (0.27,1.28)          |
| TAPVR <sup>c</sup>                       | 1.00                      | 0.53 (0.28,1.00)                                       | 0.43 (0.22,0.84)                                       | 0.67 (0.30,1.50)          |
| AVSD <sup>b</sup>                        | 1.00                      | 0.95 (0.35,2.56)                                       | 1.11 (0.41,2.98)                                       | 0.75 (0.20,2.83)          |
| RVOTO <sup>b</sup>                       | 1.00                      | 0.94 (0.67,1.33)                                       | 0.97 (0.69,1.37)                                       | 0.89 (0.57,1.39)          |
| Pulmonary/tricuspid atresia <sup>c</sup> | 1.00                      | 0.77 (0.40,1.50)                                       | 0.75 (0.38,1.47)                                       | 0.72 (0.30,1.73)          |
| Pulmonary atresia <sup>c</sup>           | 1.00                      | 0.68 (0.33,1.53)                                       | 0.55 (0.26,1.27)                                       | 0.68 (0.24,1.87)          |
| Tricuspid atresia <sup>c</sup>           | 1.00                      | 0.81 (0.26,3.25)                                       | 1.12 (0.38,4.4)                                        | 0.79 (0.13,4.11)          |
| PVS <sup>c</sup>                         | 1.00                      | 0.92 (0.61,1.37)                                       | 1.00 (0.67,1.49)                                       | 0.92 (0.56,1.53)          |
| Ebstein's Anomaly <sup>e</sup>           | 1.00                      | 8.5 (1.15,1081)                                        | 5.25 (0.67,678)                                        | 4.40 (0.35,612)           |
| Septal <sup>b</sup>                      | 1.00                      | 1.01 (0.78,1.33)                                       | 1.13 (0.86,1.47)                                       | 1.30 (0.95,1.80)          |
| VSD <sub>pm</sub> <sup>c</sup>           | 1.00                      | 0.87 (0.62,1.23)                                       | 1.04 (0.74,1.47)                                       | 1.01 (0.66,1.56)          |
| VSD <sub>muscular</sub> <sup>e</sup>     | 1.00                      | 2.13 (0.22,272)                                        | 2.37 (0.27,297)                                        | 2.78 (0.30,354)           |
| ASD <sup>c</sup>                         | 1.00                      | 1.08 (0.74,1.59)                                       | 0.99 (0.67,1.46)                                       | 1.13 (0.71,1.80)          |
| <b>Nitrogen Dioxide</b>                  |                           |                                                        |                                                        |                           |
| LVOTO <sup>b</sup>                       | 1.00                      | 1.44 (1.00,2.08)                                       | 1.49 (1.03,2.15)                                       | 1.53 (0.98,2.39)          |
| Aortic stenosis <sup>c</sup>             | 1.00                      | 2.22 (0.94,5.26)                                       | 1.66 (0.69,3.99)                                       | 2.22 (0.83,5.97)          |
| COA <sup>c</sup>                         | 1.00                      | 1.74 (0.91,3.32)                                       | 2.34 (1.24,4.42)                                       | 2.50 (1.21,5.18)          |
| HLHS <sup>c</sup>                        | 1.00                      | 1.07 (0.65,1.78)                                       | 1.04 (0.62,1.72)                                       | 0.85 (0.43,1.68)          |
| Conotruncal <sup>b</sup>                 | 1.00                      | 1.36 (0.99,1.88)                                       | 1.32 (0.96,1.82)                                       | 1.42 (0.96,2.11)          |
| d-TGA <sup>c</sup>                       | 1.00                      | 1.18 (0.71,1.95)                                       | 1.24 (0.75,2.04)                                       | 1.29 (0.69,2.38)          |
| TOF <sup>c</sup>                         | 1.00                      | 1.51 (0.98,2.34)                                       | 1.27 (0.82,1.97)                                       | 1.51 (0.89,2.57)          |
| Other conotruncals <sup>c,d</sup>        | 1.00                      | 1.33 (0.55,3.22)                                       | 1.81 (0.76,4.31)                                       | 1.49 (0.52,4.24)          |
| Common truncus <sup>e</sup>              | 1.00                      | 5.60 (0.70,724)                                        | 9.65 (1.29,1233)                                       | 3.46 (0.18,507)           |
| DORV-TGA /other <sup>e</sup>             | 1.00                      | 1.10 (0.24,10.4)                                       | 1.57 (0.37,14.6)                                       | 1.25 (0.16,13.9)          |
| IAA TypeB/NOS <sup>e</sup>               | 1.00                      | 0.68 (0.12,6.89)                                       | 0.21 (0.02,2.61)                                       | 1.36 (0.16,15.8)          |

| Defects                                  | <10 <sup>th</sup> centile | 10 <sup>th</sup> centile-<br><50 <sup>th</sup> centile | 50 <sup>th</sup> centile-<br><90 <sup>th</sup> centile | ≥90 <sup>th</sup> centile |
|------------------------------------------|---------------------------|--------------------------------------------------------|--------------------------------------------------------|---------------------------|
| VSDconovertricular <sup>c</sup>          | 1.00                      | 0.60 (0.21,2.05)                                       | 0.76 (0.28,2.54)                                       | 0.87 (0.19,3.65)          |
| APVR <sup>b</sup>                        | 1.00                      | 0.54 (0.28,1.03)                                       | 0.57 (0.30,1.09)                                       | 0.89 (0.41,1.94)          |
| TAPVR <sup>c</sup>                       | 1.00                      | 0.51 (0.26,1.01)                                       | 0.54 (0.28,1.06)                                       | 0.92 (0.42,2.03)          |
| AVSD <sup>b</sup>                        | 1.00                      | 0.63 (0.27,1.47)                                       | 0.66 (0.29,1.54)                                       | 0.64 (0.20,1.98)          |
| RVOTO <sup>b</sup>                       | 1.00                      | 1.32 (0.88,1.97)                                       | 1.50 (1.01,2.24)                                       | 2.22 (1.40,3.52)          |
| Pulmonary/tricuspid atresia <sup>c</sup> | 1.00                      | 2.45 (0.86,6.95)                                       | 2.02 (0.71,5.79)                                       | 2.33 (0.71,7.68)          |
| Pulmonary atresia <sup>c</sup>           | 1.00                      | 1.76 (0.64,6.64)                                       | 1.58 (0.57,5.96)                                       | 2.10 (0.59,8.97)          |
| Tricuspid atresia <sup>c</sup>           | 1.00                      | 2.81 (0.68,25.9)                                       | 1.88 (0.43,17.7)                                       | 2.07 (0.27,22.9)          |
| PVS <sup>c</sup>                         | 1.00                      | 1.02 (0.66,1.59)                                       | 1.30 (0.85,2.00)                                       | 2.03 (1.23,3.33)          |
| Ebstein's Anomaly <sup>e</sup>           | 1.00                      | 6.17 (0.79,795)                                        | 8.39 (1.12,1075)                                       | 11.9 (1.25,1582)          |
| Septal <sup>b</sup>                      | 1.00                      | 1.24 (0.94,1.64)                                       | 1.23 (0.94,1.63)                                       | 1.44 (1.02,2.03)          |
| VSD <sub>pm</sub> <sup>c</sup>           | 1.00                      | 1.13 (0.78,1.64)                                       | 1.18 (0.82,1.71)                                       | 1.47 (0.94,2.30)          |
| VSD <sub>muscular</sub> <sup>c</sup>     | 1.00                      | 0.75 (0.17,3.70)                                       | 0.56 (0.13,2.84)                                       | 0.46 (0.08,2.85)          |
| ASD <sup>c</sup>                         | 1.00                      | 1.29 (0.87,1.91)                                       | 1.25 (0.84,1.86)                                       | 1.23 (0.74,2.04)          |
| <b>Ozone<sup>f</sup></b>                 |                           |                                                        |                                                        |                           |
| LVOTO <sup>b</sup>                       | 1.00                      | 0.96 (0.74,1.25)                                       | 0.95 (0.73,1.23)                                       | 0.94 (0.73,1.22)          |
| Aortic stenosis <sup>c</sup>             | 1.00                      | 1.21 (0.70,2.11)                                       | 0.95 (0.53,1.67)                                       | 1.07 (0.61,1.87)          |
| COA <sup>c</sup>                         | 1.00                      | 0.74 (0.49,1.11)                                       | 0.94 (0.64,1.38)                                       | 0.97 (0.67,1.42)          |
| HLHS <sup>c</sup>                        | 1.00                      | 1.07 (0.72,1.58)                                       | 0.95 (0.64,1.41)                                       | 0.86 (0.58,1.29)          |
| Conotruncal <sup>b</sup>                 | 1.00                      | 1.16 (0.92,1.45)                                       | 0.97 (0.76,1.22)                                       | 1.00 (0.79,1.26)          |
| d-TGA <sup>c</sup>                       | 1.00                      | 0.82 (0.56,1.21)                                       | 1.08 (0.76,1.53)                                       | 0.81 (0.56,1.19)          |
| TOF <sup>c</sup>                         | 1.00                      | 1.34 (0.99,1.81)                                       | 0.86 (0.62,1.19)                                       | 1.11 (0.82,1.51)          |
| Other conotruncals <sup>c,d</sup>        | 1.00                      | 1.44 (0.79,2.62)                                       | 1.07 (0.56,2.02)                                       | 1.15 (0.62,2.13)          |
| Common truncus <sup>e</sup>              | 1.00                      | 1.73 (0.48,7.32)                                       | 1.64(0.43,7.12)                                        | 2.40 (0.70, 9.98)         |
| DORV-TGA /other <sup>e</sup>             | 1.00                      | 1.26 (0.41,4.09)                                       | 1.34 (0.44,4.32)                                       | 0.97 (0.31,3.23)          |
| IAA TypeB/NOS <sup>e</sup>               | 1.00                      | 1.10 (0.23,5.25)                                       | 0.15 (0.01,1.58)                                       | 0.85 (0.14,4.40)          |
| VSDconovertricular <sup>c</sup>          | 1.00                      | 1.53 (0.61,3.95)                                       | 0.98 (0.35,2.67)                                       | 0.89 (0.32,2.42)          |
| APVR <sup>b</sup>                        | 1.00                      | 0.95 (0.53,1.71)                                       | 1.11 (0.63,1.94)                                       | 0.95 (0.54,1.70)          |
| TAPVR <sup>c</sup>                       | 1.00                      | 1.22 (0.65,2.27)                                       | 1.35 (0.74,2.46)                                       | 1.09 (0.59,2.04)          |
| AVSD <sup>b</sup>                        | 1.00                      | 1.22 (0.53,2.81)                                       | 1.18 (0.51,2.72)                                       | 1.24 (0.54,2.85)          |
| RVOTO <sup>b</sup>                       | 1.00                      | 1.21 (0.91,1.61)                                       | 1.07 (0.80,1.44)                                       | 1.26 (0.95,1.67)          |
| Pulmonary/tricuspid atresia <sup>c</sup> | 1.00                      | 1.25 (0.67,2.32)                                       | 0.92 (0.48,1.79)                                       | 1.31 (0.72,2.39)          |
| Pulmonary atresia <sup>c</sup>           | 1.00                      | 1.23 (0.55,2.78)                                       | 1.06 (0.46,2.45)                                       | 1.87 (0.91,4.01)          |
| Tricuspid atresia <sup>c</sup>           | 1.00                      | 1.27 (0.49,3.34)                                       | 0.71 (0.22,2.06)                                       | 0.59 (0.19,1.72)          |
| PVS <sup>c</sup>                         | 1.00                      | 1.27 (0.91,1.78)                                       | 1.17 (0.84,1.64)                                       | 1.27 (0.91,1.77)          |
| Ebstein's Anomaly <sup>e</sup>           | 1.00                      | 0.74 (0.29,1.85)                                       | 0.68 (0.25,1.74)                                       | 0.88 (0.34,2.22)          |
| Septal <sup>b</sup>                      | 1.00                      | 1.03 (0.85,1.25)                                       | 0.94 (0.77,1.14)                                       | 0.89 (0.72,1.09)          |
| VSD <sub>pm</sub> <sup>c</sup>           | 1.00                      | 0.96 (0.73,1.26)                                       | 0.93 (0.70,1.23)                                       | 1.06 (0.81,1.39)          |
| VSD <sub>muscular</sub> <sup>c</sup>     | 1.00                      | 0.91 (0.36,2.19)                                       | 1.28 (0.45,3.41)                                       | 1.08 (0.47,2.42)          |
| ASD <sup>c</sup>                         | 1.00                      | 1.25 (0.97,1.61)                                       | 1.10 (0.84,1.44)                                       | 0.85 (0.63,1.14)          |

| Defects                                  | <10 <sup>th</sup> centile | 10 <sup>th</sup> centile-<br><50 <sup>th</sup> centile | 50 <sup>th</sup> centile-<br><90 <sup>th</sup> centile | ≥90 <sup>th</sup> centile |
|------------------------------------------|---------------------------|--------------------------------------------------------|--------------------------------------------------------|---------------------------|
| <b>PM<sub>10</sub></b>                   |                           |                                                        |                                                        |                           |
| LVOTO <sup>b</sup>                       | 1.00                      | 1.10 (0.79,1.55)                                       | 1.37 (0.99,1.91)                                       | 1.12 (0.72,1.72)          |
| Aortic stenosis <sup>c</sup>             | 1.00                      | 1.24 (0.62,2.46)                                       | 1.51 (0.76,2.98)                                       | 0.92 (0.36,2.32)          |
| COA <sup>c</sup>                         | 1.00                      | 1.71 (0.95,3.09)                                       | 1.77 (0.98,3.20)                                       | 1.68 (0.82,3.45)          |
| HLHS <sup>c</sup>                        | 1.00                      | 0.79 (0.48,1.31)                                       | 1.24 (0.76,2.01)                                       | 0.98 (0.52,1.87)          |
| Conotruncal <sup>b</sup>                 | 1.00                      | 1.21 (0.89,1.64)                                       | 1.31 (0.96,1.78)                                       | 1.44 (0.99,2.10)          |
| d-TGA <sup>c</sup>                       | 1.00                      | 1.10 (0.67,1.81)                                       | 1.16 (0.71,1.92)                                       | 1.45 (0.80,2.64)          |
| TOF <sup>c</sup>                         | 1.00                      | 1.14 (0.76,1.70)                                       | 1.35 (0.91,2.02)                                       | 1.30 (0.79,2.16)          |
| Other conotruncals <sup>c,d</sup>        | 1.00                      | 2.12 (0.84,5.39)                                       | 1.68 (0.65,4.34)                                       | 2.07 (0.71,6.02)          |
| Common truncus <sup>e</sup>              | 1.00                      | 2.79 (0.68,25.7)                                       | 2.34 (0.55,21.8)                                       | 1.75 (0.22,20.0)          |
| DORV-TGA /other <sup>c</sup>             | 1.00                      | 1.21 (0.36,6.20)                                       | 0.94 (0.27,4.93)                                       | 1.41 (0.29,8.49)          |
| IAA TypeB/NOS <sup>e</sup>               | 1.00                      | 2.58 (0.27,342)                                        | 1.01 (0.05,147)                                        | 8.75 (0.60,1250)          |
| VSDconoventricular <sup>c</sup>          | 1.00                      | 1.29 (0.38,6.60)                                       | 1.12 (0.32,5.82)                                       | 1.25 (0.25,7.71)          |
| APVR <sup>b</sup>                        | 1.00                      | 1.49 (0.66,3.33)                                       | 1.34 (0.59,3.03)                                       | 1.44 (0.55,3.79)          |
| TAPVR <sup>c</sup>                       | 1.00                      | 1.28 (0.57,2.89)                                       | 1.12 (0.49,2.55)                                       | 1.36 (0.52,3.60)          |
| AVSD <sup>b</sup>                        | 1.00                      | 6.25 (0.84,46.26)                                      | 6.70 (0.90,49.7)                                       | 4.80 (0.53,43.4)          |
| RVOTO <sup>b</sup>                       | 1.00                      | 1.00 (0.71,1.41)                                       | 1.18 (0.84,1.66)                                       | 0.98 (0.62,1.55)          |
| Pulmonary/tricuspid atresia <sup>c</sup> | 1.00                      | 0.75 (0.38,1.49)                                       | 0.91 (0.46,1.80)                                       | 0.43 (0.16,1.21)          |
| Pulmonary atresia <sup>c</sup>           | 1.00                      | 0.68 (0.32,1.59)                                       | 0.82 (0.39,1.90)                                       | 0.48 (0.13,1.51)          |
| Tricuspid atresia <sup>c</sup>           | 1.00                      | 0.84 (0.28,3.32)                                       | 1.04 (0.35,4.02)                                       | 0.32 (0.03,2.07)          |
| PVS <sup>c</sup>                         | 1.00                      | 1.13 (0.75,1.70)                                       | 1.31 (0.87,1.98)                                       | 1.17 (0.68,2.00)          |
| Ebstein's Anomaly <sup>c</sup>           | 1.00                      | 0.60 (0.21,2.01)                                       | 0.73 (0.26,2.43)                                       | 1.26 (0.31,5.07)          |
| Septal <sup>b</sup>                      | 1.00                      | 1.23 (0.97,1.57)                                       | 1.21 (0.95,1.55)                                       | 0.91 (0.65,1.28)          |
| VSD <sub>pm</sub> <sup>c</sup>           | 1.00                      | 1.42 (0.98,2.05)                                       | 1.42 (0.98,2.05)                                       | 1.18 (0.73,1.92)          |
| VSD <sub>muscular</sub> <sup>e</sup>     | 1.00                      | 1.18 (0.52,2.88)                                       | 1.68 (0.73,4.13)                                       | 0.69 (0.12,3.06)          |
| ASD <sup>c</sup>                         | 1.00                      | 1.14 (0.83,1.57)                                       | 1.09 (0.79,1.51)                                       | 0.81 (0.51,1.28)          |
| <b>PM<sub>2,5</sub></b>                  |                           |                                                        |                                                        |                           |
| LVOTO <sup>b</sup>                       | 1.00                      | 1.03 (0.76,1.39)                                       | 0.85 (0.62,1.15)                                       | 1.25 (0.86,1.82)          |
| Aortic stenosis <sup>c</sup>             | 1.00                      | 0.90 (0.53,1.51)                                       | 0.59 (0.33,1.03)                                       | 0.96 (0.47,1.94)          |
| COA <sup>c</sup>                         | 1.00                      | 0.88 (0.56,1.37)                                       | 0.85 (0.54,1.35)                                       | 1.06 (0.60,1.87)          |
| HLHS <sup>c</sup>                        | 1.00                      | 1.59 (0.91,2.79)                                       | 1.25 (0.70,2.21)                                       | 2.04 (1.07,3.89)          |
| Conotruncal <sup>b</sup>                 | 1.00                      | 0.97 (0.73,1.29)                                       | 0.98 (0.73,1.31)                                       | 1.20 (0.84,1.72)          |
| d-TGA <sup>c</sup>                       | 1.00                      | 0.96 (0.60,1.53)                                       | 1.03 (0.65,1.65)                                       | 1.07 (0.59,1.93)          |
| TOF <sup>c</sup>                         | 1.00                      | 0.97 (0.66,1.44)                                       | 1.02 (0.69,1.51)                                       | 1.32 (0.83,2.12)          |
| Other conotruncals <sup>c,d</sup>        | 1.00                      | 1.02 (0.50,2.05)                                       | 0.75 (0.36,1.57)                                       | 1.05 (0.45,2.49)          |
| Common truncus <sup>e</sup>              | 1.00                      | 1.20 (0.35,6.16)                                       | 0.97 (0.27,5.13)                                       | 2.54 (0.58,14.6)          |
| DORV-TGA /other <sup>c</sup>             | 1.00                      | 0.54 (0.20,1.64)                                       | 0.40 (0.13,1.31)                                       | 0.22 (0.02,1.22)          |
| IAA TypeB/NOS <sup>e</sup>               | 1.00                      | 0.56 (0.09,5.69)                                       | 0.32 (0.04,3.53)                                       | 2.35 (0.36,25.1)          |
| VSDconoventricular <sup>c</sup>          | 1.00                      | 1.52 (0.47,7.70)                                       | 1.03 (0.30,5.35)                                       | 0.97 (0.18,6.00)          |
| APVR <sup>b</sup>                        | 1.00                      | 0.91 (0.48,1.71)                                       | 0.68 (0.35,1.32)                                       | 1.10 (0.50,2.44)          |
| TAPVR <sup>c</sup>                       | 1.00                      | 0.95 (0.48,1.87)                                       | 0.68 (0.33,1.39)                                       | 1.04 (0.44,2.44)          |
| AVSD <sup>b</sup>                        | 1.00                      | 2.36 (0.71,7.85)                                       | 2.27 (0.68,7.59)                                       | 2.67 (0.67,10.5)          |

| Defects                                  | <10 <sup>th</sup> centile | 10 <sup>th</sup> centile-<br><50 <sup>th</sup> centile | 50 <sup>th</sup> centile-<br><90 <sup>th</sup> centile | ≥90 <sup>th</sup> centile |
|------------------------------------------|---------------------------|--------------------------------------------------------|--------------------------------------------------------|---------------------------|
| RVOTO <sup>b</sup>                       | 1.00                      | 0.92 (0.67,1.27)                                       | 0.96 (0.69,1.32)                                       | 0.93 (0.60,1.42)          |
| Pulmonary/tricuspid atresia <sup>c</sup> | 1.00                      | 0.89 (0.46,1.7)                                        | 0.62 (0.31,1.23)                                       | 0.74 (0.32,1.73)          |
| Pulmonary atresia <sup>c</sup>           | 1.00                      | 0.68 (0.33,1.52)                                       | 0.61 (0.29,1.40)                                       | 0.69 (0.25,1.86)          |
| Tricuspid atresia <sup>c</sup>           | 1.00                      | 1.37 (0.49,5.21)                                       | 0.53 (0.15,2.27)                                       | 0.90 (0.18,4.45)          |
| PVS <sup>c</sup>                         | 1.00                      | 0.93 (0.64,1.36)                                       | 1.09 (0.74,1.58)                                       | 1.05 (0.64,1.72)          |
| Ebstein's Anomaly <sup>e</sup>           | 1.00                      | 0.80 (0.32,2.36)                                       | 0.70 (0.27,2.13)                                       | 0.45 (0.04,2.34)          |
| Septal <sup>b</sup>                      | 1.00                      | 0.89 (0.72,1.1)                                        | 0.66 (0.53,0.83)                                       | 0.62 (0.45,0.85)          |
| VSD <sub>pm</sub> <sup>c</sup>           | 1.00                      | 1.17 (0.83,1.64)                                       | 1.06 (0.75,1.50)                                       | 0.85 (0.54,1.35)          |
| VSD <sub>muscular</sub> <sup>g</sup>     | 1.00                      | n/a                                                    | n/a                                                    | n/a                       |
| ASD <sup>c</sup>                         | 1.00                      | 0.80 (0.63,1.03)                                       | 0.50 (0.38,0.65)                                       | 0.54 (0.35,0.81)          |
| <b>Sulfur Dioxide</b>                    |                           |                                                        |                                                        |                           |
| LVOTO <sup>b</sup>                       | 1.00                      | 1.32 (0.88,1.98)                                       | 1.49 (0.99,2.24)                                       | 1.07 (0.64,1.79)          |
| Aortic stenosis <sup>c</sup>             | 1.00                      | 0.93 (0.44,1.97)                                       | 0.84 (0.39,1.83)                                       | 0.58 (0.20,1.65)          |
| COA <sup>c</sup>                         | 1.00                      | 1.21 (0.65,2.24)                                       | 1.74 (0.95,3.20)                                       | 1.62 (0.79,3.30)          |
| HLHS <sup>c</sup>                        | 1.00                      | 1.98 (0.97,4.04)                                       | 1.84 (0.89,3.78)                                       | 0.96 (0.37,2.47)          |
| Conotruncal <sup>b</sup>                 | 1.00                      | 1.12 (0.78,1.60)                                       | 1.35 (0.95,1.92)                                       | 1.22 (0.79,1.88)          |
| d-TGA <sup>c</sup>                       | 1.00                      | 1.32 (0.72,2.43)                                       | 1.61 (0.88,2.96)                                       | 1.46 (0.71,2.98)          |
| TOF <sup>c</sup>                         | 1.00                      | 1.08 (0.67,1.73)                                       | 1.20 (0.74,1.92)                                       | 1.17 (0.66,2.07)          |
| Other conotruncals <sup>c,d</sup>        | 1.00                      | 0.90 (0.37,2.16)                                       | 1.50 (0.64,3.53)                                       | 0.91 (0.30,2.79)          |
| Common truncus <sup>e</sup>              | 1.00                      | 0.74 (0.21,3.17)                                       | 1.19 (0.35,5.14)                                       | 1.58 (0.31,8.16)          |
| DORV-TGA /other <sup>e</sup>             | 1.00                      | 0.79 (0.18,4.66)                                       | 1.71 (0.42,10.1)                                       | 0.41 (0.00,5.48)          |
| IAA TypeB/NOS <sup>h</sup>               | 1.00                      | n/a                                                    | n/a                                                    | n/a                       |
| VSDconovertricular <sup>c</sup>          | 1.00                      | 0.82 (0.22,4.40)                                       | 1.27 (0.35,6.91)                                       | 0.50 (0.04,3.88)          |
| APVR <sup>b</sup>                        | 1.00                      | 1.33 (0.54,3.30)                                       | 1.65 (0.67,4.09)                                       | 1.02 (0.32,3.28)          |
| TAPVR <sup>c</sup>                       | 1.00                      | 1.03 (0.41,2.61)                                       | 1.46 (0.58,3.62)                                       | 0.93 (0.29,2.99)          |
| AVSD <sup>b</sup>                        | 1.00                      | 0.82 (0.28,3.20)                                       | 1.10 (0.39,4.23)                                       | 1.54 (0.45,6.46)          |
| RVOTO <sup>b</sup>                       | 1.00                      | 1.81 (1.15,2.83)                                       | 1.65 (1.04,2.60)                                       | 1.24 (0.70,2.18)          |
| Pulmonary/tricuspid atresia <sup>c</sup> | 1.00                      | 1.13 (0.49,2.61)                                       | 1.17 (0.50,2.73)                                       | 0.76 (0.25,2.31)          |
| Pulmonary atresia <sup>c</sup>           | 1.00                      | 1.22 (0.47,3.94)                                       | 1.31 (0.50,4.23)                                       | 0.74 (0.16,3.09)          |
| Tricuspid atresia <sup>c</sup>           | 1.00                      | 0.81 (0.25,3.34)                                       | 0.66 (0.19,2.82)                                       | 0.78 (0.13,4.17)          |
| PVS <sup>c</sup>                         | 1.00                      | 2.34 (1.33,4.14)                                       | 2.06 (1.16,3.67)                                       | 1.48 (0.74,2.97)          |
| Ebstein's Anomaly <sup>e</sup>           | 1.00                      | 0.75 (0.24,3.01)                                       | 0.76 (0.23,3.15)                                       | 1.45 (0.34,6.72)          |
| Septal <sup>b</sup>                      | 1.00                      | 1.06 (0.82,1.38)                                       | 1.09 (0.84,1.43)                                       | 1.12 (0.80,1.58)          |
| VSD <sub>pm</sub> <sup>c</sup>           | 1.00                      | 1.26 (0.84,1.89)                                       | 1.36 (0.90,2.05)                                       | 1.48 (0.91,2.42)          |
| VSD <sub>muscular</sub> <sup>h</sup>     | 1.00                      | n/a                                                    | n/a                                                    | n/a                       |
| ASD <sup>c</sup>                         | 1.00                      | 0.93 (0.68,1.28)                                       | 0.83 (0.59,1.16)                                       | 0.67 (0.41,1.09)          |

Abbreviations: APVR-anomalous pulmonary venous return; ASD-atrial septal defect; AVSD-atrioventricular septal defect; COA-coarctation of the aorta; DORV-TGA/Other-double outlet right ventricle with transposition of the great arteries or not (other); d-TGA-d-transposition of the great arteries;

HLHS-hypoplastic left heart syndrome; IAA TypeB/NOS-interrupted aortic arch Type B or not otherwise specified; LVOTO-left ventricular outflow tract obstructions; PM<sub>10</sub>-particulate matter less than 10 microns in diameter; PM<sub>2.5</sub>-particulate matter less than 2.5 microns in diameter; PVS-pulmonary valve stenosis; RVOTO-right ventricular outflow tract obstructions; TAPVR-total anomalous pulmonary venous return; TOF-tetralogy of Fallot; VSDconoverricular- conoverricular septal defects; VSD<sub>muscular</sub>-muscular ventricular septal defects; VSD<sub>pm</sub>-perimembranous ventricular septal defects.

<sup>a</sup>All results for the National Birth Defects Prevention Study population from 1997-2006, except for PM<sub>2.5</sub> which was 1999-2006 due to unavailability of monitoring data for PM<sub>2.5</sub> prior to 1999. <sup>b</sup>Estimates from a hierarchical regression model. First stage was polytomous logistic model with defect groupings and adjusted for maternal race, age, educational attainment, household income, maternal smoking status and alcohol consumption during early pregnancy, nativity, and site-specific heart defect ratio. Second stage was a linear model with indicator variables for defect grouping and level of exposure. Defect-groupings include all individual defects listed underneath with the following additions: LVOTO also includes IAA-Type A and APVR also includes partial APVR. Those defects could not be analyzed individually due to limited sample size. <sup>c</sup>Estimates result from a hierarchical regression model, same as above but used individual defects as outcomes in first-stage model and included indicator variable for individual defect in second-stage model. <sup>d</sup>Other conotruncals includes common truncus, interrupted aortic-arch, type B and type not specified, double outlet right ventricle defects, and conoverricular septal defects. <sup>e</sup>Estimates result from model utilizing Firth's penalized maximum likelihood regression to deal with quasi-separation of points due to small sample size in certain cells. Model adjusted for same variables as above. <sup>f</sup>For ozone, the three categories of exposure were 25<sup>th</sup> to less than the 50<sup>th</sup> centile, 50<sup>th</sup> centile to less than the 75<sup>th</sup> centile, at or greater than the 75<sup>th</sup> centile, with the referent grouping being below the 25<sup>th</sup> centile. <sup>g</sup>VSD<sub>muscular</sub> defects were only collected in the first year of data collection, 1997. There was no available monitoring data for PM<sub>2.5</sub> during this time. <sup>h</sup>Adjusted odds ratios could not be estimated due to very small number of cases.

**Table S3:** Adjusted odds ratios and 95% confidence intervals between congenital heart defects and 7-week exposure to nitrogen dioxide and particulate matter by distance to major road ( $\leq 50$  km or  $>50$  km), National Birth Defects Prevention Study, 1997-2006.

| Defect                                   | $\leq 50$ km:<br><10 <sup>th</sup> centile | $\leq 50$ km:<br>10 <sup>th</sup> centile-<br><50 <sup>th</sup> centile | $\leq 50$ km:<br>50 <sup>th</sup> centile-<br><90 <sup>th</sup> centile | $\leq 50$ km:<br>$\geq 90$ <sup>th</sup> centile | $>50$ km:<br><10 <sup>th</sup> centile | $>50$ km:<br>10 <sup>th</sup> centile-<br><50 <sup>th</sup> centile | $>50$ km:<br>50 <sup>th</sup> centile-<br><90 <sup>th</sup> centile | $>50$ km:<br>$\geq 90$ <sup>th</sup> centile |
|------------------------------------------|--------------------------------------------|-------------------------------------------------------------------------|-------------------------------------------------------------------------|--------------------------------------------------|----------------------------------------|---------------------------------------------------------------------|---------------------------------------------------------------------|----------------------------------------------|
| <b>Nitrogen Dioxide</b>                  |                                            |                                                                         |                                                                         |                                                  |                                        |                                                                     |                                                                     |                                              |
| LVOTO <sup>a</sup>                       | 1.00                                       | 1.01 (0.45,2.26)                                                        | 1.31 (0.60,2.85)                                                        | 2.11 (0.82,5.45)                                 | 1.00                                   | 1.54 (1.01,2.33)                                                    | 1.53 (1.01,2.33)                                                    | 1.41 (0.85,2.34)                             |
| Aortic stenosis <sup>b</sup>             | 1.00                                       | 3.29 (0.40,26.9)                                                        | 1.42 (0.16,13.0)                                                        | 7.52 (0.81,69.9)                                 | 1.00                                   | 2.03 (0.79,5.25)                                                    | 1.63 (0.63,4.25)                                                    | 1.57 (0.50,4.93)                             |
| COA <sup>b</sup>                         | 1.00                                       | 0.23 (0.05,0.98)                                                        | 1.22 (0.44,3.40)                                                        | 1.69 (0.47,6.16)                                 | 1.00                                   | 2.79 (1.19,6.52)                                                    | 3.28 (1.41,7.61)                                                    | 3.32 (1.30,8.43)                             |
| HLHS <sup>b</sup>                        | 1.00                                       | 1.60 (0.44,5.78)                                                        | 1.41 (0.39,5.14)                                                        | 1.12 (0.18,6.97)                                 | 1.00                                   | 0.97 (0.56,1.70)                                                    | 0.95 (0.55,1.66)                                                    | 0.76 (0.36,1.60)                             |
| Conotruncal <sup>a</sup>                 | 1.00                                       | 3.17 (1.21,8.26)                                                        | 3.80 (1.47,9.80)                                                        | 7.12 (2.53,20.0)                                 | 1.00                                   | 1.16 (0.82,1.64)                                                    | 1.07 (0.76,1.52)                                                    | 0.96 (0.62,1.50)                             |
| d-TGA <sup>b</sup>                       | 1.00                                       | 2.68 (0.59,12.0)                                                        | 3.54 (0.81,15.6)                                                        | 6.23 (1.24,31.2)                                 | 1.00                                   | 1.00 (0.58,1.71)                                                    | 1.00 (0.58,1.71)                                                    | 0.88 (0.43,1.77)                             |
| TOF <sup>b</sup>                         | 1.00                                       | 4.66 (1.08,20.1)                                                        | 4.53 (1.05,19.5)                                                        | 11.1 (2.39,51.0)                                 | 1.00                                   | 1.26 (0.79,1.99)                                                    | 1.01 (0.63,1.61)                                                    | 0.92 (0.50,1.69)                             |
| Other conotruncals <sup>b,c</sup>        | 1.00                                       | 1.34 (0.15,12.2)                                                        | 3.06 (0.38,24.6)                                                        | 1.49 (0.09,24.5)                                 | 1.00                                   | 1.28 (0.49,3.38)                                                    | 1.60 (0.62,4.17)                                                    | 1.40 (0.43,4.50)                             |
| APVR <sup>a</sup>                        | 1.00                                       | 1.01 (0.26,3.92)                                                        | 1.18 (0.31,4.42)                                                        | 1.10 (0.18,6.85)                                 | 1.00                                   | 0.45 (0.21,0.95)                                                    | 0.45 (0.21,0.95)                                                    | 0.88 (0.36,2.14)                             |
| RVOTO <sup>a</sup>                       | 1.00                                       | 1.56 (0.62,3.95)                                                        | 1.14 (0.44,2.97)                                                        | 3.55 (1.25,10.1)                                 | 1.00                                   | 1.25 (0.80,1.95)                                                    | 1.53 (0.99,2.38)                                                    | 1.98 (1.19,3.31)                             |
| Pulmonary/tricuspid atresia <sup>b</sup> | 1.00                                       | 1.40 (0.28,6.92)                                                        | 0.96 (0.18,5.10)                                                        | 1.83 (0.25,13.4)                                 | 1.00                                   | 3.6 (0.85,15.3)                                                     | 3.04 (0.71,13.0)                                                    | 3.07 (0.61,15.5)                             |
| PVS <sup>b</sup>                         | 1.00                                       | 1.48 (0.48,4.58)                                                        | 1.09 (0.34,3.47)                                                        | 3.11 (0.86,11.2)                                 | 1.00                                   | 0.93 (0.58,1.50)                                                    | 1.28 (0.80,2.04)                                                    | 1.85 (1.08,3.18)                             |
| Septal <sup>a</sup>                      | 1.00                                       | 1.74 (0.93,3.26)                                                        | 1.41 (0.74,2.66)                                                        | 1.80 (0.80,4.03)                                 | 1.00                                   | 1.14 (0.84,1.55)                                                    | 1.18 (0.87,1.61)                                                    | 1.35 (0.93,1.98)                             |
| VSD <sub>pm</sub> <sup>b</sup>           | 1.00                                       | 2.68 (1.02,7.05)                                                        | 1.98 (0.74,5.27)                                                        | 2.87 (0.91,9.06)                                 | 1.00                                   | 0.93 (0.62,1.40)                                                    | 1.05 (0.71,1.57)                                                    | 1.28 (0.78,2.09)                             |
| ASD <sup>b</sup>                         | 1.00                                       | 1.07 (0.48,2.38)                                                        | 0.96 (0.43,2.17)                                                        | 0.97 (0.31,3.05)                                 | 1.00                                   | 1.36 (0.87,2.14)                                                    | 1.34 (0.85,2.11)                                                    | 1.30 (0.73,2.30)                             |
| <b>PM<sub>10</sub></b>                   |                                            |                                                                         |                                                                         |                                                  |                                        |                                                                     |                                                                     |                                              |
| LVOTO <sup>a</sup>                       | 1.00                                       | 1.21 (0.56,2.60)                                                        | 1.33 (0.62,2.86)                                                        | 2.20 (0.85,5.71)                                 | 1.00                                   | 1.08 (0.74,1.57)                                                    | 1.37 (0.95,1.98)                                                    | 0.96 (0.59,1.57)                             |
| Aortic stenosis <sup>b</sup>             | 1.00                                       | 1.49 (0.32,6.98)                                                        | 1.15 (0.23,5.69)                                                        | 3.90 (0.68,22.5)                                 | 1.00                                   | 1.18 (0.54,2.55)                                                    | 1.57 (0.73,3.35)                                                    | 0.49 (0.14,1.67)                             |
| COA <sup>b</sup>                         | 1.00                                       | 0.56 (0.16,1.90)                                                        | 1.34 (0.44,4.09)                                                        | 1.76 (0.42,7.42)                                 | 1.00                                   | 2.18 (1.08,4.39)                                                    | 1.97 (0.97,3.98)                                                    | 1.78 (0.76,4.12)                             |
| HLHS <sup>b</sup>                        | 1.00                                       | 1.89 (0.55,6.50)                                                        | 1.43 (0.40,5.11)                                                        | 1.76 (0.34,9.13)                                 | 1.00                                   | 0.63 (0.36,1.09)                                                    | 1.19 (0.71,2.01)                                                    | 0.88 (0.44,1.78)                             |
| Conotruncal <sup>a</sup>                 | 1.00                                       | 1.19 (0.59,2.40)                                                        | 1.55 (0.78,3.09)                                                        | 2.63 (1.14,6.06)                                 | 1.00                                   | 1.20 (0.85,1.69)                                                    | 1.25 (0.89,1.76)                                                    | 1.27 (0.84,1.94)                             |
| d-TGA <sup>b</sup>                       | 1.00                                       | 0.97 (0.31,3.06)                                                        | 1.46 (0.48,4.44)                                                        | 2.04 (0.52,8.00)                                 | 1.00                                   | 1.12 (0.64,1.94)                                                    | 1.10 (0.63,1.92)                                                    | 1.38 (0.71,2.68)                             |
| TOF <sup>b</sup>                         | 1.00                                       | 1.14 (0.45,2.89)                                                        | 1.61 (0.65,4.00)                                                        | 2.86 (0.98,8.42)                                 | 1.00                                   | 1.13 (0.72,1.77)                                                    | 1.30 (0.83,2.04)                                                    | 1.08 (0.61,1.92)                             |
| Other conotruncals <sup>b,c</sup>        | 1.00                                       | 2.34 (0.29,19.0)                                                        | 1.54 (0.18,13.4)                                                        | 3.13 (0.27,35.9)                                 | 1.00                                   | 2.07 (0.73,5.88)                                                    | 1.67 (0.58,4.81)                                                    | 1.96 (0.59,6.50)                             |

| Defect                                      | ≤50 km:<br><10 <sup>th</sup> centile | ≤50 km:<br>10 <sup>th</sup> centile-<br><50 <sup>th</sup> centile | ≤50 km:<br>50 <sup>th</sup> centile-<br><90 <sup>th</sup> centile | ≤50 km:<br>≥90 <sup>th</sup> centile | >50 km:<br><10 <sup>th</sup> centile | >50 km:<br>10 <sup>th</sup> centile-<br><50 <sup>th</sup> centile | >50 km:<br>50 <sup>th</sup> centile-<br><90 <sup>th</sup> centile | >50 km:<br>≥90 <sup>th</sup> centile |
|---------------------------------------------|--------------------------------------|-------------------------------------------------------------------|-------------------------------------------------------------------|--------------------------------------|--------------------------------------|-------------------------------------------------------------------|-------------------------------------------------------------------|--------------------------------------|
| APVR <sup>d</sup>                           |                                      |                                                                   |                                                                   |                                      |                                      |                                                                   |                                                                   |                                      |
| RVOTO <sup>a</sup>                          | 1.00                                 | 1.74 (0.66,4.63)                                                  | 1.99 (0.75,5.28)                                                  | 3.59 (1.14,11.4)                     | 1.00                                 | 0.90 (0.62,1.3)                                                   | 1.07 (0.74,1.54)                                                  | 0.75 (0.45,1.25)                     |
| Pulmonary/tricuspid<br>atresia <sup>b</sup> | 1.00                                 | 2.72 (0.34,21.8)                                                  | 2.49 (0.31,20.3)                                                  | 1.49 (0.09,24.6)                     | 1.00                                 | 0.58 (0.27,1.22)                                                  | 0.77 (0.37,1.58)                                                  | 0.29 (0.09,0.96)                     |
| PVS <sup>b</sup>                            | 1.00                                 | 1.29 (0.43,3.93)                                                  | 1.71 (0.57,5.12)                                                  | 3.25 (0.87,12.2)                     | 1.00                                 | 1.09 (0.70,1.69)                                                  | 1.24 (0.80,1.93)                                                  | 0.95 (0.52,1.72)                     |
| Septal <sup>a</sup>                         | 1.00                                 | 1.51 (0.86,2.64)                                                  | 1.43 (0.81,2.52)                                                  | 1.36 (0.60,3.10)                     | 1.00                                 | 1.17 (0.89,1.53)                                                  | 1.16 (0.88,1.52)                                                  | 0.83 (0.57,1.21)                     |
| VSD <sub>pm</sub> <sup>b</sup>              | 1.00                                 | 1.68 (0.73,3.89)                                                  | 1.59 (0.68,3.70)                                                  | 1.77 (0.56,5.57)                     | 1.00                                 | 1.36 (0.90,2.04)                                                  | 1.38 (0.91,2.08)                                                  | 1.08 (0.63,1.86)                     |
| ASD <sup>b</sup>                            | 1.00                                 | 1.37 (0.66,2.83)                                                  | 1.24 (0.59,2.61)                                                  | 0.96 (0.30,3.06)                     | 1.00                                 | 1.10 (0.77,1.56)                                                  | 1.06 (0.74,1.51)                                                  | 0.77 (0.47,1.28)                     |

Abbreviations: APVR-anomalous pulmonary venous return; ASD-atrial septal defect; AVSD- atrioventricular septal defect; COA-coarctation of the aorta; d-TGA-d-transposition of the great arteries; HLHS-hypoplastic left heart syndrome; LVOTO-left ventricular outflow tract obstructions; PM<sub>10</sub>-particulate matter less than 10 microns in diameter; PVS-pulmonary valve stenosis; RVOTO-right ventricular outflow tract obstructions; TOF-tetralogy of Fallot; VSD<sub>pm</sub>-perimembranous ventricular septal defects.

<sup>a</sup>Estimates result from maximum-likelihood, polytomous logistic model between defect grouping and exposure which includes an interaction term between exposure and distance to roadway and adjusted for maternal race, maternal age, maternal educational attainment, maternal household income, maternal smoking status and alcohol consumption during early pregnancy, nativity, and site-specific heart defect ratio.

All defect-groupings include the individual defects underneath with the following additions: LVOTO includes interrupted aortic arch-type A; APVR includes total and partial APVR; RVOTO includes Ebstein's anomaly; Septals includes muscular ventricular septal defects (VSD<sub>muscular</sub>).

<sup>b</sup>Estimates result from maximum-likelihood, polytomous logistic model between individual defect and exposure which includes an interaction term between exposure and distance to roadway and adjusted for maternal race, maternal age, maternal educational attainment, maternal household income, maternal smoking status and alcohol consumption during early pregnancy, nativity, and site-specific heart defect ratio.

<sup>c</sup>Other conotruncals include common truncus, interrupted aortic-arch, type B and type not specified, double outlet right ventricle defects, and conoventricular septal defects. <sup>d</sup>Could not be estimated due to small sample size.

**Table S4:** Adjusted odds ratios and 95% confidence intervals between congenital heart defects and weekly exposure to criteria air pollutants from hierarchical models, National Birth Defects Prevention Study, 1997-2006.<sup>a</sup>

| <b>Exposure and Defect</b>                 | <b>&lt;10<sup>th</sup> centile</b> | <b>10-&lt;50<sup>th</sup> centile</b> | <b>50-&lt;90<sup>th</sup> centile</b> | <b>≥90<sup>th</sup> centile</b> |
|--------------------------------------------|------------------------------------|---------------------------------------|---------------------------------------|---------------------------------|
| <b>CO (ppm)</b>                            |                                    |                                       |                                       |                                 |
| Week 2                                     | <0.52                              | 0.52-<1.14                            | 1.14-<2.21                            | ≥2.21                           |
| Week 3                                     | <0.52                              | 0.52-<1.14                            | 1.14-<2.21                            | ≥2.21                           |
| Week 4                                     | <0.52                              | 0.52-<1.13                            | 1.13-<2.24                            | ≥2.24                           |
| Week 5                                     | <0.51                              | 0.52-<1.13                            | 1.13-<2.21                            | ≥2.21                           |
| Week 6                                     | <0.52                              | 0.52-<1.13                            | 1.13-<2.23                            | ≥2.23                           |
| Week 7                                     | <0.51                              | 0.51-<1.13                            | 1.13-<2.19                            | ≥2.19                           |
| Week 8                                     | <0.52                              | 0.52-<1.13                            | 1.13-<2.23                            | ≥2.23                           |
| <b>LVOTO<sup>b</sup><br/>[OR (95% CI)]</b> |                                    |                                       |                                       |                                 |
| Week 2                                     | 1.00                               | 0.99 (0.67,1.47)                      | 0.99 (0.63,1.55)                      | 0.98 (0.56,1.70)                |
| Week 3                                     | 1.00                               | 1.06 (0.69,1.62)                      | 1.21 (0.75,1.95)                      | 1.15 (0.64,2.08)                |
| Week 4                                     | 1.00                               | 0.76 (0.51,1.13)                      | 0.60 (0.38,0.95)                      | 0.76 (0.43,1.34)                |
| Week 5                                     | 1.00                               | 1.13 (0.75,1.73)                      | 1.07 (0.67,1.72)                      | 0.79 (0.43,1.44)                |
| Week 6                                     | 1.00                               | 1.16 (0.76,1.76)                      | 1.28 (0.80,2.05)                      | 0.88 (0.48,1.60)                |
| Week 7                                     | 1.00                               | 1.03 (0.69,1.56)                      | 1.25 (0.79,1.99)                      | 1.45 (0.82,2.59)                |
| Week 8                                     | 1.00                               | 1.13 (0.76,1.69)                      | 1.09 (0.70,1.71)                      | 0.91 (0.52,1.62)                |
| <b>Aortic stenosis<sup>c</sup></b>         |                                    |                                       |                                       |                                 |
| Week 2                                     | 1.00                               | 0.88 (0.46,1.68)                      | 0.95 (0.46,1.93)                      | 0.90 (0.37,2.18)                |
| Week 3                                     | 1.00                               | 0.93 (0.47,1.82)                      | 1.06 (0.51,2.20)                      | 0.66 (0.25,1.74)                |
| Week 4                                     | 1.00                               | 0.65 (0.34,1.22)                      | 0.59 (0.29,1.20)                      | 0.68 (0.27,1.70)                |
| Week 5                                     | 1.00                               | 1.48 (0.73,2.99)                      | 1.38 (0.64,2.96)                      | 0.95 (0.36,2.50)                |
| Week 6                                     | 1.00                               | 1.14 (0.58,2.24)                      | 1.18 (0.57,2.47)                      | 0.74 (0.28,1.94)                |
| Week 7                                     | 1.00                               | 0.77 (0.40,1.50)                      | 1.11 (0.54,2.28)                      | 1.35 (0.55,3.29)                |
| Week 8                                     | 1.00                               | 0.93 (0.48,1.79)                      | 0.94 (0.46,1.92)                      | 0.90 (0.37,2.18)                |
| <b>COA<sup>c</sup></b>                     |                                    |                                       |                                       |                                 |
| Week 2                                     | 1.00                               | 0.90 (0.54,1.52)                      | 0.93 (0.52,1.65)                      | 0.83 (0.40,1.74)                |
| Week 3                                     | 1.00                               | 1.2 (0.68,2.12)                       | 1.21 (0.65,2.27)                      | 1.11 (0.50,2.42)                |
| Week 4                                     | 1.00                               | 0.81 (0.48,1.37)                      | 0.62 (0.34,1.12)                      | 0.91 (0.43,1.90)                |
| Week 5                                     | 1.00                               | 0.94 (0.55,1.62)                      | 0.88 (0.48,1.62)                      | 0.78 (0.35,1.71)                |
| Week 6                                     | 1.00                               | 1.48 (0.83,2.64)                      | 1.39 (0.74,2.61)                      | 1.19 (0.54,2.62)                |
| Week 7                                     | 1.00                               | 1.44 (0.81,2.58)                      | 1.60 (0.85,3.01)                      | 1.70 (0.78,3.71)                |
| Week 8                                     | 1.00                               | 1.13 (0.65,1.94)                      | 1.12 (0.62,2.03)                      | 1.06 (0.50,2.25)                |
| <b>HLHS<sup>c</sup></b>                    |                                    |                                       |                                       |                                 |
| Week 2                                     | 1.00                               | 1.13 (0.64,1.99)                      | 1.01 (0.54,1.89)                      | 1.01 (0.48,2.15)                |
| Week 3                                     | 1.00                               | 0.94 (0.52,1.70)                      | 1.13 (0.59,2.14)                      | 1.27 (0.58,2.76)                |
| Week 4                                     | 1.00                               | 1.12 (0.63,2.00)                      | 0.91 (0.48,1.72)                      | 1.05 (0.49,2.27)                |
| Week 5                                     | 1.00                               | 1.09 (0.60,1.97)                      | 1.13 (0.59,2.15)                      | 0.79 (0.35,1.78)                |
| Week 6                                     | 1.00                               | 0.97 (0.55,1.71)                      | 1.30 (0.70,2.43)                      | 0.82 (0.36,1.83)                |

| <b>Exposure and Defect</b>              | <b>&lt;10<sup>th</sup> centile</b> | <b>10-&lt;50<sup>th</sup> centile</b> | <b>50-&lt;90<sup>th</sup> centile</b> | <b>≥90<sup>th</sup> centile</b> |
|-----------------------------------------|------------------------------------|---------------------------------------|---------------------------------------|---------------------------------|
| Week 7                                  | 1.00                               | 0.79 (0.45,1.37)                      | 0.96 (0.52,1.77)                      | 1.26 (0.59,2.67)                |
| Week 8                                  | 1.00                               | 1.11 (0.63,1.93)                      | 0.98 (0.53,1.81)                      | 0.60 (0.27,1.33)                |
| <b>Conotruncal<sup>b</sup></b>          |                                    |                                       |                                       |                                 |
| Week 2                                  | 1.00                               | 1.17 (0.81,1.69)                      | 1.04 (0.69,1.57)                      | 0.93 (0.56,1.56)                |
| Week 3                                  | 1.00                               | 0.93 (0.63,1.36)                      | 0.95 (0.62,1.47)                      | 0.75 (0.43,1.29)                |
| Week 4                                  | 1.00                               | 1.12 (0.76,1.65)                      | 1.27 (0.82,1.95)                      | 0.96 (0.56,1.65)                |
| Week 5                                  | 1.00                               | 0.83 (0.57,1.22)                      | 0.85 (0.55,1.31)                      | 0.91 (0.53,1.55)                |
| Week 6                                  | 1.00                               | 1.26 (0.85,1.87)                      | 1.32 (0.85,2.05)                      | 1.53 (0.90,2.61)                |
| Week 7                                  | 1.00                               | 1.13 (0.77,1.67)                      | 1.16 (0.75,1.78)                      | 1.59 (0.94,2.69)                |
| Week 8                                  | 1.00                               | 0.96 (0.67,1.38)                      | 0.94 (0.63,1.41)                      | 0.84 (0.51,1.40)                |
| <b>d-TGA<sup>c</sup></b>                |                                    |                                       |                                       |                                 |
| Week 2                                  | 1.00                               | 0.98 (0.59,1.64)                      | 0.73 (0.41,1.29)                      | 0.64 (0.31,1.33)                |
| Week 3                                  | 1.00                               | 1.07 (0.61,1.86)                      | 1.00 (0.54,1.84)                      | 0.94 (0.44,2.01)                |
| Week 4                                  | 1.00                               | 1.15 (0.65,2.03)                      | 1.65 (0.89,3.07)                      | 1.01 (0.46,2.20)                |
| Week 5                                  | 1.00                               | 0.83 (0.48,1.43)                      | 0.99 (0.54,1.82)                      | 0.87 (0.40,1.85)                |
| Week 6                                  | 1.00                               | 1.12 (0.64,1.94)                      | 1.16 (0.63,2.14)                      | 1.34 (0.63,2.81)                |
| Week 7                                  | 1.00                               | 1.12 (0.64,1.94)                      | 1.08 (0.59,1.99)                      | 1.42 (0.68,2.97)                |
| Week 8                                  | 1.00                               | 1.00 (0.59,1.71)                      | 0.94 (0.52,1.69)                      | 1.08 (0.53,2.21)                |
| <b>TOF<sup>c</sup></b>                  |                                    |                                       |                                       |                                 |
| Week 2                                  | 1.00                               | 1.30 (0.80,2.09)                      | 1.36 (0.81,2.31)                      | 1.29 (0.68,2.44)                |
| Week 3                                  | 1.00                               | 0.84 (0.53,1.35)                      | 0.82 (0.48,1.38)                      | 0.56 (0.29,1.09)                |
| Week 4                                  | 1.00                               | 0.94 (0.59,1.51)                      | 0.95 (0.57,1.60)                      | 0.73 (0.38,1.40)                |
| Week 5                                  | 1.00                               | 1.09 (0.67,1.77)                      | 0.94 (0.55,1.63)                      | 1.24 (0.64,2.39)                |
| Week 6                                  | 1.00                               | 1.24 (0.76,2.03)                      | 1.39 (0.81,2.39)                      | 1.60 (0.83,3.10)                |
| Week 7                                  | 1.00                               | 1.24 (0.76,2.01)                      | 1.32 (0.77,2.25)                      | 1.73 (0.91,3.32)                |
| Week 8                                  | 1.00                               | 0.91 (0.58,1.43)                      | 0.92 (0.56,1.52)                      | 0.71 (0.38,1.35)                |
| <b>Other conotruncals<sup>c,d</sup></b> |                                    |                                       |                                       |                                 |
| Week 2                                  | 1.00                               | 1.15 (0.58,2.29)                      | 0.84 (0.40,1.76)                      | 0.70 (0.28,1.76)                |
| Week 3                                  | 1.00                               | 0.94 (0.45,1.96)                      | 1.49 (0.69,3.21)                      | 1.31 (0.51,3.34)                |
| Week 4                                  | 1.00                               | 1.31 (0.63,2.74)                      | 1.15 (0.53,2.54)                      | 1.32 (0.52,3.32)                |
| Week 5                                  | 1.00                               | 0.57 (0.29,1.13)                      | 0.81 (0.39,1.69)                      | 0.68 (0.27,1.74)                |
| Week 6                                  | 1.00                               | 1.39 (0.68,2.85)                      | 1.07 (0.49,2.33)                      | 1.18 (0.47,2.99)                |
| Week 7                                  | 1.00                               | 0.88 (0.44,1.75)                      | 0.88 (0.42,1.87)                      | 1.61 (0.66,3.93)                |
| Week 8                                  | 1.00                               | 0.96 (0.49,1.91)                      | 0.91 (0.43,1.90)                      | 0.74 (0.29,1.85)                |
| <b>APVR<sup>b</sup></b>                 |                                    |                                       |                                       |                                 |
| Week 2                                  | 1.00                               | 0.67 (0.35,1.30)                      | 0.84 (0.40,1.77)                      | 1.16 (0.47,2.87)                |
| Week 3                                  | 1.00                               | 1.03 (0.52,2.04)                      | 1.23 (0.56,2.67)                      | 1.12 (0.43,2.92)                |
| Week 4                                  | 1.00                               | 0.79 (0.40,1.55)                      | 0.88 (0.41,1.90)                      | 0.96 (0.37,2.48)                |
| Week 5                                  | 1.00                               | 1.27 (0.64,2.51)                      | 0.81 (0.37,1.81)                      | 1.17 (0.45,3.05)                |
| Week 6                                  | 1.00                               | 1.09 (0.56,2.13)                      | 0.93 (0.43,2.03)                      | 0.49 (0.18,1.34)                |
| Week 7                                  | 1.00                               | 0.51 (0.27,0.98)                      | 0.47 (0.22,0.99)                      | 0.93 (0.37,2.35)                |
| Week 8                                  | 1.00                               | 0.81 (0.42,1.56)                      | 0.83 (0.39,1.77)                      | 0.97 (0.39,2.45)                |
| <b>TAPVR<sup>c</sup></b>                |                                    |                                       |                                       |                                 |
| Week 2                                  | 1.00                               | 0.71 (0.37,1.38)                      | 0.91 (0.43,1.92)                      | 1.02 (0.40,2.58)                |

| <b>Exposure and Defect</b>                     | <b>&lt;10<sup>th</sup> centile</b> | <b>10-&lt;50<sup>th</sup> centile</b> | <b>50-&lt;90<sup>th</sup> centile</b> | <b>≥90<sup>th</sup> centile</b> |
|------------------------------------------------|------------------------------------|---------------------------------------|---------------------------------------|---------------------------------|
| Week 3                                         | 1.00                               | 1.05 (0.52,2.11)                      | 1.06 (0.48,2.33)                      | 1.16 (0.44,3.05)                |
| Week 4                                         | 1.00                               | 0.84 (0.42,1.65)                      | 0.79 (0.36,1.73)                      | 1.04 (0.4,2.7)                  |
| Week 5                                         | 1.00                               | 1.36 (0.68,2.72)                      | 0.80 (0.36,1.80)                      | 1.15 (0.44,3.04)                |
| Week 6                                         | 1.00                               | 1.15 (0.59,2.27)                      | 0.94 (0.43,2.07)                      | 0.53 (0.19,1.45)                |
| Week 7                                         | 1.00                               | 0.57 (0.30,1.10)                      | 0.53 (0.25,1.15)                      | 1.25 (0.49,3.16)                |
| Week 8                                         | 1.00                               | 0.82 (0.43,1.59)                      | 0.76 (0.36,1.63)                      | 1.04 (0.41,2.63)                |
| <b>AVSD<sup>b</sup></b>                        |                                    |                                       |                                       |                                 |
| Week 2                                         | 1.00                               | 0.73 (0.31,1.70)                      | 0.76 (0.31,1.86)                      | 2.00 (0.74,5.45)                |
| Week 3                                         | 1.00                               | 1.14 (0.48,2.74)                      | 1.43 (0.57,3.56)                      | 0.77 (0.23,2.58)                |
| Week 4                                         | 1.00                               | 1.24 (0.51,3.04)                      | 1.13 (0.44,2.87)                      | 0.94 (0.30,2.98)                |
| Week 5                                         | 1.00                               | 1.05 (0.45,2.46)                      | 1.07 (0.43,2.69)                      | 0.57 (0.15,2.13)                |
| Week 6                                         | 1.00                               | 1.05 (0.45,2.40)                      | 0.97 (0.39,2.36)                      | 0.87 (0.28,2.72)                |
| Week 7                                         | 1.00                               | 0.88 (0.38,2.05)                      | 1.02 (0.42,2.49)                      | 1.00 (0.32,3.12)                |
| Week 8                                         | 1.00                               | 0.97 (0.43,2.2)                       | 0.77 (0.32,1.86)                      | 0.75 (0.24,2.30)                |
| <b>RVOTO<sup>b</sup></b>                       |                                    |                                       |                                       |                                 |
| Week 2                                         | 1.00                               | 0.61 (0.42,0.91)                      | 0.64 (0.41,1.00)                      | 0.45 (0.25,0.80)                |
| Week 3                                         | 1.00                               | 1.33 (0.85,2.10)                      | 1.15 (0.69,1.92)                      | 1.03 (0.55,1.93)                |
| Week 4                                         | 1.00                               | 0.92 (0.60,1.42)                      | 0.81 (0.49,1.31)                      | 0.94 (0.52,1.71)                |
| Week 5                                         | 1.00                               | 1.11 (0.71,1.74)                      | 1.26 (0.76,2.09)                      | 1.37 (0.73,2.55)                |
| Week 6                                         | 1.00                               | 1.45 (0.93,2.28)                      | 1.18 (0.71,1.95)                      | 1.46 (0.79,2.70)                |
| Week 7                                         | 1.00                               | 0.83 (0.54,1.28)                      | 0.95 (0.59,1.55)                      | 1.48 (0.83,2.67)                |
| Week 8                                         | 1.00                               | 1.15 (0.75,1.77)                      | 1.31 (0.81,2.12)                      | 0.81 (0.44,1.50)                |
| <b>Pulmonary/tricuspid atresia<sup>c</sup></b> |                                    |                                       |                                       |                                 |
| Week 2                                         | 1.00                               | 0.92 (0.48,1.78)                      | 0.78 (0.37,1.62)                      | 0.92 (0.37,2.31)                |
| Week 3                                         | 1.00                               | 0.91 (0.47,1.78)                      | 0.58 (0.27,1.24)                      | 0.81 (0.32,2.09)                |
| Week 4                                         | 1.00                               | 1.47 (0.71,3.02)                      | 0.99 (0.45,2.17)                      | 0.99 (0.38,2.60)                |
| Week 5                                         | 1.00                               | 1.39 (0.66,2.93)                      | 1.56 (0.70,3.46)                      | 1.10 (0.40,2.97)                |
| Week 6                                         | 1.00                               | 0.97 (0.48,1.93)                      | 0.97 (0.45,2.08)                      | 1.61 (0.64,4.06)                |
| Week 7                                         | 1.00                               | 0.99 (0.49,1.97)                      | 1.14 (0.54,2.44)                      | 1.45 (0.57,3.73)                |
| Week 8                                         | 1.00                               | 0.72 (0.38,1.38)                      | 0.89 (0.44,1.82)                      | 0.51 (0.19,1.36)                |
| <b>PVS<sup>c</sup></b>                         |                                    |                                       |                                       |                                 |
| Week 2                                         | 1.00                               | 0.53 (0.34,0.81)                      | 0.63 (0.39,1.02)                      | 0.37 (0.19,0.70)                |
| Week 3                                         | 1.00                               | 1.42 (0.86,2.37)                      | 1.38 (0.78,2.42)                      | 1.07 (0.54,2.14)                |
| Week 4                                         | 1.00                               | 0.84 (0.53,1.35)                      | 0.72 (0.42,1.22)                      | 0.82 (0.43,1.56)                |
| Week 5                                         | 1.00                               | 0.94 (0.57,1.53)                      | 1.00 (0.58,1.72)                      | 1.30 (0.67,2.53)                |
| Week 6                                         | 1.00                               | 1.57 (0.95,2.60)                      | 1.31 (0.75,2.29)                      | 1.50 (0.77,2.94)                |
| Week 7                                         | 1.00                               | 0.78 (0.49,1.25)                      | 0.88 (0.52,1.49)                      | 1.52 (0.81,2.87)                |
| Week 8                                         | 1.00                               | 1.43 (0.87,2.35)                      | 1.58 (0.91,2.73)                      | 1.01 (0.51,1.98)                |
| <b>Septal<sup>b</sup></b>                      |                                    |                                       |                                       |                                 |
| Week 2                                         | 1.00                               | 1.07 (0.76,1.5)                       | 1.03 (0.70,1.5)                       | 0.90 (0.57,1.42)                |
| Week 3                                         | 1.00                               | 0.93 (0.65,1.33)                      | 1.07 (0.72,1.61)                      | 1.20 (0.74,1.95)                |
| Week 4                                         | 1.00                               | 1.16 (0.81,1.65)                      | 1.16 (0.78,1.74)                      | 1.10 (0.68,1.78)                |
| Week 5                                         | 1.00                               | 0.99 (0.69,1.42)                      | 1.04 (0.69,1.57)                      | 1.23 (0.75,2.00)                |

| <b>Exposure and Defect</b>                 | <b>&lt;10<sup>th</sup> centile</b> | <b>10-&lt;50<sup>th</sup> centile</b> | <b>50-&lt;90<sup>th</sup> centile</b> | <b>≥90<sup>th</sup> centile</b> |
|--------------------------------------------|------------------------------------|---------------------------------------|---------------------------------------|---------------------------------|
| Week 6                                     | 1.00                               | 1.00 (0.71,1.42)                      | 0.84 (0.56,1.24)                      | 0.92 (0.57,1.48)                |
| Week 7                                     | 1.00                               | 1.24 (0.87,1.77)                      | 1.25 (0.84,1.87)                      | 1.31 (0.81,2.13)                |
| Week 8                                     | 1.00                               | 0.75 (0.54,1.03)                      | 0.85 (0.59,1.22)                      | 0.79 (0.50,1.25)                |
| <b>VSD<sub>pm</sub><sup>c</sup></b>        |                                    |                                       |                                       |                                 |
| Week 2                                     | 1.00                               | 1.08 (0.71,1.65)                      | 1.05 (0.65,1.68)                      | 0.95 (0.54,1.69)                |
| Week 3                                     | 1.00                               | 0.93 (0.60,1.46)                      | 1.09 (0.67,1.80)                      | 1.07 (0.59,1.96)                |
| Week 4                                     | 1.00                               | 0.91 (0.59,1.40)                      | 0.98 (0.60,1.59)                      | 0.90 (0.50,1.62)                |
| Week 5                                     | 1.00                               | 0.87 (0.56,1.36)                      | 0.99 (0.60,1.64)                      | 0.97 (0.53,1.77)                |
| Week 6                                     | 1.00                               | 1.04 (0.68,1.61)                      | 0.86 (0.53,1.40)                      | 0.76 (0.42,1.38)                |
| Week 7                                     | 1.00                               | 1.20 (0.77,1.88)                      | 1.35 (0.82,2.21)                      | 1.79 (0.99,3.23)                |
| Week 8                                     | 1.00                               | 0.84 (0.55,1.27)                      | 0.83 (0.53,1.32)                      | 0.87 (0.49,1.53)                |
| <b>ASD<sup>c</sup></b>                     |                                    |                                       |                                       |                                 |
| Week 2                                     | 1.00                               | 1.07 (0.69,1.67)                      | 0.94 (0.57,1.54)                      | 0.67 (0.36,1.25)                |
| Week 3                                     | 1.00                               | 0.88 (0.55,1.41)                      | 1.00 (0.59,1.69)                      | 1.04 (0.55,1.98)                |
| Week 4                                     | 1.00                               | 1.42 (0.88,2.30)                      | 1.30 (0.76,2.21)                      | 1.19 (0.62,2.29)                |
| Week 5                                     | 1.00                               | 1.14 (0.71,1.85)                      | 1.03 (0.60,1.77)                      | 1.58 (0.83,3.02)                |
| Week 6                                     | 1.00                               | 0.97 (0.61,1.52)                      | 0.90 (0.54,1.49)                      | 1.13 (0.60,2.13)                |
| Week 7                                     | 1.00                               | 1.26 (0.79,2.01)                      | 1.13 (0.67,1.91)                      | 0.99 (0.52,1.90)                |
| Week 8                                     | 1.00                               | 0.68 (0.44,1.04)                      | 0.83 (0.52,1.33)                      | 0.60 (0.33,1.12)                |
| <b>NO<sub>2</sub> (ppb)</b>                |                                    |                                       |                                       |                                 |
| Week 2                                     | <17.1                              | 17.1-<33.0                            | 33.0-<48.0                            | ≥48.0                           |
| Week 3                                     | <17.1                              | 17.1-<33.0                            | 33.0-<48.0                            | ≥48.0                           |
| Week 4                                     | <17                                | 17.0-<33.2                            | 33.2-<47.9                            | ≥47.9                           |
| Week 5                                     | <17.1                              | 17.1-<32.9                            | 32.9-<48.1                            | ≥48.1                           |
| Week 6                                     | <17.3                              | 17.3-<32.9                            | 32.9-<48.4                            | ≥48.4                           |
| Week 7                                     | <17.1                              | 17.1-<32.9                            | 32.9-<48.0                            | ≥48.0                           |
| Week 8                                     | <17.3                              | 17.3-<32.7                            | 32.7-<47.2                            | ≥47.2                           |
| <b>LVOTO<sup>b</sup><br/>[OR (95% CI)]</b> |                                    |                                       |                                       |                                 |
| Week 2                                     | 1.00                               | 0.92 (0.57,1.47)                      | 0.94 (0.56,1.56)                      | 1.10 (0.62,1.97)                |
| Week 3                                     | 1.00                               | 1.22 (0.74,2.03)                      | 1.37 (0.80,2.36)                      | 0.79 (0.41,1.52)                |
| Week 4                                     | 1.00                               | 1.34 (0.82,2.21)                      | 1.10 (0.64,1.89)                      | 1.20 (0.64,2.23)                |
| Week 5                                     | 1.00                               | 1.03 (0.62,1.70)                      | 1.08 (0.63,1.86)                      | 0.98 (0.52,1.85)                |
| Week 6                                     | 1.00                               | 1.03 (0.63,1.69)                      | 1.08 (0.63,1.85)                      | 1.00 (0.53,1.87)                |
| Week 7                                     | 1.00                               | 1.24 (0.75,2.02)                      | 1.34 (0.78,2.29)                      | 1.58 (0.86,2.92)                |
| Week 8                                     | 1.00                               | 0.68 (0.44,1.06)                      | 0.68 (0.42,1.09)                      | 0.76 (0.43,1.33)                |
| <b>Aortic stenosis<sup>c</sup></b>         |                                    |                                       |                                       |                                 |
| Week 2                                     | 1.00                               | 0.89 (0.44,1.80)                      | 0.72 (0.34,1.53)                      | 1.14 (0.48,2.72)                |
| Week 3                                     | 1.00                               | 1.73 (0.78,3.88)                      | 2.38 (1.03,5.46)                      | 0.63 (0.21,1.89)                |
| Week 4                                     | 1.00                               | 1.27 (0.59,2.71)                      | 1.11 (0.50,2.48)                      | 1.94 (0.78,4.81)                |
| Week 5                                     | 1.00                               | 0.96 (0.46,1.98)                      | 0.79 (0.36,1.72)                      | 0.67 (0.26,1.75)                |
| Week 6                                     | 1.00                               | 0.95 (0.47,1.92)                      | 0.68 (0.32,1.48)                      | 0.57 (0.22,1.47)                |
| Week 7                                     | 1.00                               | 0.96 (0.47,1.95)                      | 0.90 (0.42,1.94)                      | 0.98 (0.40,2.43)                |
| Week 8                                     | 1.00                               | 0.72 (0.35,1.48)                      | 0.96 (0.45,2.03)                      | 1.72 (0.73,4.04)                |

| <b>Exposure and Defect</b>              | <b>&lt;10<sup>th</sup> centile</b> | <b>10-&lt;50<sup>th</sup> centile</b> | <b>50-&lt;90<sup>th</sup> centile</b> | <b>≥90<sup>th</sup> centile</b> |
|-----------------------------------------|------------------------------------|---------------------------------------|---------------------------------------|---------------------------------|
| <b>COA<sup>c</sup></b>                  |                                    |                                       |                                       |                                 |
| Week 2                                  | 1.00                               | 1.10 (0.57,2.13)                      | 0.92 (0.46,1.84)                      | 1.35 (0.63,2.89)                |
| Week 3                                  | 1.00                               | 1.16 (0.60,2.24)                      | 1.36 (0.68,2.70)                      | 0.74 (0.33,1.68)                |
| Week 4                                  | 1.00                               | 1.65 (0.82,3.32)                      | 1.53 (0.74,3.19)                      | 1.48 (0.65,3.37)                |
| Week 5                                  | 1.00                               | 1.22 (0.58,2.54)                      | 1.28 (0.60,2.73)                      | 1.55 (0.68,3.58)                |
| Week 6                                  | 1.00                               | 0.92 (0.47,1.80)                      | 1.23 (0.61,2.48)                      | 1.32 (0.60,2.91)                |
| Week 7                                  | 1.00                               | 1.31 (0.66,2.60)                      | 1.40 (0.68,2.86)                      | 1.79 (0.81,3.96)                |
| Week 8                                  | 1.00                               | 0.74 (0.41,1.34)                      | 0.67 (0.36,1.25)                      | 0.62 (0.30,1.31)                |
| <b>HLHS<sup>c</sup></b>                 |                                    |                                       |                                       |                                 |
| Week 2                                  | 1.00                               | 0.87 (0.47,1.60)                      | 1.17 (0.61,2.23)                      | 0.85 (0.38,1.86)                |
| Week 3                                  | 1.00                               | 1.09 (0.58,2.05)                      | 1.09 (0.55,2.15)                      | 1.07 (0.48,2.38)                |
| Week 4                                  | 1.00                               | 1.27 (0.69,2.36)                      | 0.90 (0.46,1.77)                      | 0.83 (0.37,1.88)                |
| Week 5                                  | 1.00                               | 0.86 (0.46,1.61)                      | 0.99 (0.51,1.94)                      | 0.63 (0.27,1.47)                |
| Week 6                                  | 1.00                               | 1.10 (0.58,2.09)                      | 1.11 (0.56,2.20)                      | 0.89 (0.39,2.04)                |
| Week 7                                  | 1.00                               | 1.21 (0.64,2.28)                      | 1.37 (0.69,2.70)                      | 1.34 (0.60,2.98)                |
| Week 8                                  | 1.00                               | 0.67 (0.38,1.18)                      | 0.67 (0.37,1.24)                      | 0.76 (0.36,1.61)                |
| <b>Conotruncal<sup>b</sup></b>          |                                    |                                       |                                       |                                 |
| Week 2                                  | 1.00                               | 0.95 (0.61,1.46)                      | 1.11 (0.70,1.77)                      | 1.15 (0.67,1.96)                |
| Week 3                                  | 1.00                               | 1.87 (1.14,3.08)                      | 1.63 (0.96,2.79)                      | 1.60 (0.88,2.93)                |
| Week 4                                  | 1.00                               | 1.57 (0.98,2.50)                      | 1.39 (0.84,2.30)                      | 1.45 (0.81,2.59)                |
| Week 5                                  | 1.00                               | 0.51 (0.34,0.76)                      | 0.49 (0.31,0.77)                      | 0.48 (0.28,0.83)                |
| Week 6                                  | 1.00                               | 1.14 (0.72,1.80)                      | 1.40 (0.85,2.29)                      | 1.21 (0.68,2.17)                |
| Week 7                                  | 1.00                               | 1.06 (0.69,1.63)                      | 0.83 (0.51,1.33)                      | 0.91 (0.52,1.58)                |
| Week 8                                  | 1.00                               | 0.90 (0.59,1.37)                      | 1.13 (0.71,1.77)                      | 1.19 (0.70,2.03)                |
| <b>d-TGA<sup>c</sup></b>                |                                    |                                       |                                       |                                 |
| Week 2                                  | 1.00                               | 0.88 (0.49,1.56)                      | 0.97 (0.52,1.80)                      | 0.87 (0.41,1.82)                |
| Week 3                                  | 1.00                               | 1.73 (0.91,3.31)                      | 1.23 (0.62,2.47)                      | 1.24 (0.56,2.73)                |
| Week 4                                  | 1.00                               | 1.56 (0.82,2.94)                      | 1.37 (0.69,2.72)                      | 1.67 (0.76,3.64)                |
| Week 5                                  | 1.00                               | 0.60 (0.34,1.04)                      | 0.54 (0.29,0.99)                      | 0.64 (0.30,1.34)                |
| Week 6                                  | 1.00                               | 0.97 (0.52,1.82)                      | 1.21 (0.62,2.36)                      | 1.55 (0.72,3.34)                |
| Week 7                                  | 1.00                               | 1.15 (0.64,2.06)                      | 0.94 (0.49,1.77)                      | 0.74 (0.34,1.61)                |
| Week 8                                  | 1.00                               | 0.90 (0.50,1.62)                      | 1.21 (0.65,2.26)                      | 1.23 (0.59,2.59)                |
| <b>TOF<sup>c</sup></b>                  |                                    |                                       |                                       |                                 |
| Week 2                                  | 1.00                               | 0.97 (0.57,1.65)                      | 1.11 (0.63,1.94)                      | 1.37 (0.72,2.60)                |
| Week 3                                  | 1.00                               | 1.65 (0.91,2.99)                      | 1.60 (0.85,2.99)                      | 1.40 (0.68,2.86)                |
| Week 4                                  | 1.00                               | 1.77 (0.99,3.14)                      | 1.51 (0.81,2.80)                      | 1.46 (0.72,2.96)                |
| Week 5                                  | 1.00                               | 0.53 (0.33,0.86)                      | 0.55 (0.32,0.93)                      | 0.47 (0.24,0.92)                |
| Week 6                                  | 1.00                               | 1.22 (0.70,2.14)                      | 1.42 (0.78,2.58)                      | 0.97 (0.47,1.98)                |
| Week 7                                  | 1.00                               | 1.00 (0.60,1.68)                      | 0.79 (0.45,1.39)                      | 1.19 (0.62,2.27)                |
| Week 8                                  | 1.00                               | 0.91 (0.55,1.52)                      | 1.04 (0.60,1.80)                      | 1.10 (0.58,2.11)                |
| <b>Other conotruncals<sup>c,d</sup></b> |                                    |                                       |                                       |                                 |
| Week 2                                  | 1.00                               | 0.99 (0.43,2.24)                      | 1.43 (0.63,3.27)                      | 1.00 (0.38,2.64)                |
| Week 3                                  | 1.00                               | 1.45 (0.61,3.45)                      | 1.33 (0.55,3.19)                      | 1.58 (0.60,4.16)                |
| Week 4                                  | 1.00                               | 1.01 (0.47,2.16)                      | 1.02 (0.46,2.28)                      | 1.01 (0.39,2.61)                |

| <b>Exposure and Defect</b>               | <b>&lt;10<sup>th</sup> centile</b> | <b>10-&lt;50<sup>th</sup> centile</b> | <b>50-&lt;90<sup>th</sup> centile</b> | <b>≥90<sup>th</sup> centile</b> |
|------------------------------------------|------------------------------------|---------------------------------------|---------------------------------------|---------------------------------|
| Week 5                                   | 1.00                               | 0.72 (0.33,1.56)                      | 0.78 (0.35,1.76)                      | 0.86 (0.34,2.21)                |
| Week 6                                   | 1.00                               | 0.79 (0.36,1.71)                      | 1.02 (0.46,2.28)                      | 0.69 (0.26,1.86)                |
| Week 7                                   | 1.00                               | 1.67 (0.73,3.81)                      | 1.21 (0.52,2.83)                      | 0.88 (0.32,2.41)                |
| Week 8                                   | 1.00                               | 0.71 (0.33,1.51)                      | 0.99 (0.45,2.17)                      | 1.17 (0.47,2.92)                |
| APVR <sup>b</sup>                        |                                    |                                       |                                       |                                 |
| Week 2                                   | 1.00                               | 0.77 (0.36,1.66)                      | 0.65 (0.29,1.47)                      | 1.50 (0.61,3.71)                |
| Week 3                                   | 1.00                               | 1.33 (0.60,2.95)                      | 0.98 (0.42,2.31)                      | 1.02 (0.38,2.72)                |
| Week 4                                   | 1.00                               | 1.01 (0.47,2.16)                      | 0.90 (0.39,2.06)                      | 1.15 (0.44,3.00)                |
| Week 5                                   | 1.00                               | 0.53 (0.24,1.16)                      | 0.94 (0.42,2.15)                      | 1.53 (0.59,3.97)                |
| Week 6                                   | 1.00                               | 0.94 (0.44,2.03)                      | 0.85 (0.37,1.96)                      | 0.64 (0.23,1.75)                |
| Week 7                                   | 1.00                               | 1.37 (0.63,3.02)                      | 1.26 (0.54,2.93)                      | 0.63 (0.22,1.81)                |
| Week 8                                   | 1.00                               | 0.93 (0.44,1.96)                      | 0.53 (0.23,1.22)                      | 1.51 (0.61,3.71)                |
| TAPVR <sup>c</sup>                       |                                    |                                       |                                       |                                 |
| Week 2                                   | 1.00                               | 0.71 (0.34,1.52)                      | 0.60 (0.26,1.36)                      | 1.43 (0.58,3.53)                |
| Week 3                                   | 1.00                               | 1.30 (0.59,2.87)                      | 0.79 (0.34,1.86)                      | 1.01 (0.38,2.64)                |
| Week 4                                   | 1.00                               | 0.98 (0.46,2.10)                      | 0.85 (0.37,1.95)                      | 1.10 (0.42,2.88)                |
| Week 5                                   | 1.00                               | 0.54 (0.24,1.20)                      | 1.09 (0.48,2.49)                      | 1.38 (0.52,3.62)                |
| Week 6                                   | 1.00                               | 1.09 (0.50,2.39)                      | 0.79 (0.34,1.82)                      | 0.57 (0.21,1.59)                |
| Week 7                                   | 1.00                               | 1.37 (0.61,3.04)                      | 1.44 (0.62,3.34)                      | 0.72 (0.25,2.05)                |
| Week 8                                   | 1.00                               | 0.77 (0.37,1.62)                      | 0.50 (0.22,1.14)                      | 1.65 (0.68,4.01)                |
| AVSD <sup>b</sup>                        |                                    |                                       |                                       |                                 |
| Week 2                                   | 1.00                               | 0.64 (0.26,1.52)                      | 0.80 (0.33,1.95)                      | 1.35 (0.49,3.71)                |
| Week 3                                   | 1.00                               | 0.98 (0.39,2.43)                      | 1.33 (0.53,3.37)                      | 1.22 (0.41,3.57)                |
| Week 4                                   | 1.00                               | 0.94 (0.39,2.24)                      | 1.00 (0.40,2.51)                      | 0.95 (0.32,2.84)                |
| Week 5                                   | 1.00                               | 0.63 (0.27,1.48)                      | 0.67 (0.27,1.66)                      | 0.64 (0.20,1.98)                |
| Week 6                                   | 1.00                               | 1.43 (0.58,3.54)                      | 1.11 (0.43,2.90)                      | 0.59 (0.17,1.99)                |
| Week 7                                   | 1.00                               | 0.96 (0.41,2.26)                      | 0.76 (0.30,1.89)                      | 1.05 (0.37,3.02)                |
| Week 8                                   | 1.00                               | 0.8 (0.34,1.91)                       | 1.00 (0.41,2.45)                      | 0.68 (0.21,2.24)                |
| RVOTO <sup>b</sup>                       |                                    |                                       |                                       |                                 |
| Week 2                                   | 1.00                               | 1.02 (0.62,1.70)                      | 0.85 (0.49,1.48)                      | 0.71 (0.38,1.34)                |
| Week 3                                   | 1.00                               | 0.94 (0.55,1.60)                      | 1.29 (0.73,2.29)                      | 1.23 (0.64,2.36)                |
| Week 4                                   | 1.00                               | 1.29 (0.76,2.20)                      | 0.90 (0.50,1.60)                      | 1.02 (0.53,1.95)                |
| Week 5                                   | 1.00                               | 0.72 (0.43,1.21)                      | 1.04 (0.59,1.82)                      | 1.13 (0.59,2.16)                |
| Week 6                                   | 1.00                               | 0.74 (0.44,1.23)                      | 0.96 (0.55,1.68)                      | 1.02 (0.54,1.93)                |
| Week 7                                   | 1.00                               | 1.38 (0.81,2.37)                      | 1.33 (0.74,2.39)                      | 1.27 (0.66,2.45)                |
| Week 8                                   | 1.00                               | 1.04 (0.62,1.75)                      | 0.97 (0.55,1.68)                      | 1.53 (0.83,2.83)                |
| Pulmonary/tricuspid atresia <sup>c</sup> |                                    |                                       |                                       |                                 |
| Week 2                                   | 1.00                               | 0.93 (0.43,1.99)                      | 0.98 (0.44,2.18)                      | 1.03 (0.40,2.63)                |
| Week 3                                   | 1.00                               | 0.72 (0.34,1.52)                      | 1.08 (0.49,2.36)                      | 0.96 (0.36,2.53)                |
| Week 4                                   | 1.00                               | 1.43 (0.65,3.15)                      | 1.52 (0.66,3.51)                      | 0.94 (0.33,2.69)                |
| Week 5                                   | 1.00                               | 1.16 (0.51,2.64)                      | 1.32 (0.56,3.10)                      | 0.76 (0.26,2.20)                |
| Week 6                                   | 1.00                               | 0.62 (0.30,1.27)                      | 0.70 (0.32,1.52)                      | 0.59 (0.22,1.59)                |
| Week 7                                   | 1.00                               | 1.77 (0.81,3.87)                      | 0.93 (0.40,2.16)                      | 0.93 (0.35,2.52)                |

| <b>Exposure and Defect</b>          | <b>&lt;10<sup>th</sup> centile</b> | <b>10-&lt;50<sup>th</sup> centile</b> | <b>50-&lt;90<sup>th</sup> centile</b> | <b>≥90<sup>th</sup> centile</b> |
|-------------------------------------|------------------------------------|---------------------------------------|---------------------------------------|---------------------------------|
| Week 8                              | 1.00                               | 0.68 (0.33,1.40)                      | 0.68 (0.31,1.47)                      | 1.19 (0.48,2.92)                |
| <b>PVS<sup>c</sup></b>              |                                    |                                       |                                       |                                 |
| Week 2                              | 1.00                               | 0.95 (0.55,1.65)                      | 0.76 (0.42,1.37)                      | 0.66 (0.33,1.29)                |
| Week 3                              | 1.00                               | 1.02 (0.56,1.85)                      | 1.33 (0.71,2.49)                      | 1.22 (0.60,2.48)                |
| Week 4                              | 1.00                               | 1.34 (0.75,2.39)                      | 0.82 (0.44,1.53)                      | 0.97 (0.48,1.95)                |
| Week 5                              | 1.00                               | 0.55 (0.31,0.96)                      | 0.85 (0.47,1.54)                      | 1.14 (0.57,2.24)                |
| Week 6                              | 1.00                               | 0.90 (0.50,1.63)                      | 1.22 (0.65,2.28)                      | 1.38 (0.69,2.80)                |
| Week 7                              | 1.00                               | 1.15 (0.64,2.05)                      | 1.32 (0.71,2.46)                      | 1.31 (0.65,2.63)                |
| Week 8                              | 1.00                               | 1.10 (0.62,1.96)                      | 1.05 (0.57,1.93)                      | 1.53 (0.78,3.00)                |
| <b>Septal<sup>b</sup></b>           |                                    |                                       |                                       |                                 |
| Week 2                              | 1.00                               | 0.99 (0.67,1.44)                      | 0.92 (0.61,1.39)                      | 0.80 (0.49,1.30)                |
| Week 3                              | 1.00                               | 1.11 (0.74,1.67)                      | 1.05 (0.67,1.63)                      | 0.84 (0.50,1.41)                |
| Week 4                              | 1.00                               | 1.52 (1.00,2.32)                      | 1.51 (0.96,2.39)                      | 1.48 (0.88,2.51)                |
| Week 5                              | 1.00                               | 0.99 (0.66,1.49)                      | 1.15 (0.74,1.80)                      | 1.56 (0.93,2.60)                |
| Week 6                              | 1.00                               | 0.68 (0.46,0.99)                      | 0.74 (0.49,1.13)                      | 0.63 (0.38,1.05)                |
| Week 7                              | 1.00                               | 1.15 (0.78,1.69)                      | 0.88 (0.57,1.35)                      | 0.92 (0.56,1.52)                |
| Week 8                              | 1.00                               | 1.06 (0.72,1.56)                      | 1.18 (0.77,1.80)                      | 1.82 (1.13,2.94)                |
| <b>VSD<sub>pm</sub><sup>c</sup></b> |                                    |                                       |                                       |                                 |
| Week 2                              | 1.00                               | 1.09 (0.67,1.78)                      | 0.95 (0.56,1.61)                      | 0.94 (0.51,1.73)                |
| Week 3                              | 1.00                               | 1.14 (0.68,1.91)                      | 1.18 (0.68,2.06)                      | 0.89 (0.47,1.71)                |
| Week 4                              | 1.00                               | 1.24 (0.74,2.06)                      | 1.31 (0.75,2.28)                      | 1.09 (0.57,2.09)                |
| Week 5                              | 1.00                               | 1.03 (0.61,1.75)                      | 1.23 (0.70,2.16)                      | 1.75 (0.92,3.33)                |
| Week 6                              | 1.00                               | 0.70 (0.43,1.12)                      | 0.79 (0.47,1.34)                      | 0.63 (0.34,1.18)                |
| Week 7                              | 1.00                               | 1.23 (0.75,2.01)                      | 0.77 (0.45,1.32)                      | 0.95 (0.51,1.77)                |
| Week 8                              | 1.00                               | 0.94 (0.58,1.53)                      | 1.05 (0.62,1.78)                      | 1.88 (1.04,3.40)                |
| <b>ASD<sup>c</sup></b>              |                                    |                                       |                                       |                                 |
| Week 2                              | 1.00                               | 0.94 (0.58,1.52)                      | 0.90 (0.54,1.52)                      | 0.65 (0.34,1.22)                |
| Week 3                              | 1.00                               | 1.06 (0.63,1.77)                      | 0.99 (0.57,1.73)                      | 0.80 (0.41,1.55)                |
| Week 4                              | 1.00                               | 1.60 (0.93,2.77)                      | 1.52 (0.85,2.75)                      | 1.60 (0.81,3.14)                |
| Week 5                              | 1.00                               | 0.74 (0.45,1.22)                      | 0.87 (0.50,1.50)                      | 1.05 (0.55,2.01)                |
| Week 6                              | 1.00                               | 0.77 (0.47,1.26)                      | 0.81 (0.47,1.39)                      | 0.76 (0.40,1.45)                |
| Week 7                              | 1.00                               | 1.26 (0.75,2.11)                      | 1.18 (0.67,2.07)                      | 1.12 (0.58,2.16)                |
| Week 8                              | 1.00                               | 1.14 (0.68,1.90)                      | 1.24 (0.71,2.14)                      | 1.49 (0.79,2.81)                |
| <b>Ozone (ppb)<sup>e</sup></b>      |                                    |                                       |                                       |                                 |
| Week 2                              | <30.6                              | 30.6-<42.1                            | 42.1-<53.1                            | ≥53.1                           |
| Week 3                              | <30.6                              | 30.6-<42.0                            | 42.0-<52.9                            | ≥52.9                           |
| Week 4                              | <30.4                              | 30.4-<42.3                            | 42.3-<53.1                            | ≥53.1                           |
| Week 5                              | <30.4                              | 30.4-<42.1                            | 42.1-<53.3                            | ≥53.3                           |
| Week 6                              | <30.3                              | 30.3-<42.1                            | 42.1-<53.4                            | ≥53.4                           |
| Week 7                              | <31                                | 31.0-<42.4                            | 42.4-<52.7                            | ≥52.7                           |
| Week 8                              | <30.6                              | 30.6-<41.9                            | 41.9-<53.0                            | ≥53.0                           |

| <b>Exposure and Defect</b>                | <b>&lt;10<sup>th</sup> centile</b> | <b>10-&lt;50<sup>th</sup> centile</b> | <b>50-&lt;90<sup>th</sup> centile</b> | <b>≥90<sup>th</sup> centile</b> |
|-------------------------------------------|------------------------------------|---------------------------------------|---------------------------------------|---------------------------------|
| <b>LVOTO<sup>b</sup></b><br>[OR (95% CI)] |                                    |                                       |                                       |                                 |
| Week 2                                    | 1.00                               | 0.83 (0.59,1.18)                      | 0.96 (0.65,1.44)                      | 0.88 (0.57,1.37)                |
| Week 3                                    | 1.00                               | 1.13 (0.79,1.63)                      | 0.99 (0.64,1.52)                      | 1.12 (0.69,1.80)                |
| Week 4                                    | 1.00                               | 0.98 (0.68,1.42)                      | 0.95 (0.61,1.47)                      | 0.85 (0.52,1.38)                |
| Week 5                                    | 1.00                               | 0.65 (0.46,0.94)                      | 0.69 (0.45,1.06)                      | 0.73 (0.45,1.17)                |
| Week 6                                    | 1.00                               | 1.52 (1.05,2.20)                      | 1.34 (0.86,2.10)                      | 1.22 (0.74,2.01)                |
| Week 7                                    | 1.00                               | 1.18 (0.82,1.69)                      | 1.03 (0.67,1.58)                      | 1.24 (0.78,1.99)                |
| Week 8                                    | 1.00                               | 0.99 (0.70,1.38)                      | 1.10 (0.75,1.62)                      | 1.08 (0.70,1.67)                |
| <b>Aortic stenosis<sup>c</sup></b>        |                                    |                                       |                                       |                                 |
| Week 2                                    | 1.00                               | 0.96 (0.52,1.78)                      | 1.30 (0.68,2.52)                      | 0.98 (0.46,2.06)                |
| Week 3                                    | 1.00                               | 1.58 (0.85,2.96)                      | 1.13 (0.55,2.32)                      | 1.45 (0.66,3.16)                |
| Week 4                                    | 1.00                               | 1.16 (0.62,2.15)                      | 0.91 (0.44,1.85)                      | 1.16 (0.53,2.54)                |
| Week 5                                    | 1.00                               | 0.97 (0.53,1.78)                      | 0.72 (0.35,1.46)                      | 0.77 (0.35,1.71)                |
| Week 6                                    | 1.00                               | 1.38 (0.75,2.54)                      | 0.90 (0.44,1.84)                      | 0.74 (0.33,1.66)                |
| Week 7                                    | 1.00                               | 0.89 (0.49,1.63)                      | 0.71 (0.36,1.44)                      | 1.27 (0.60,2.69)                |
| Week 8                                    | 1.00                               | 1.29 (0.72,2.34)                      | 1.48 (0.77,2.84)                      | 1.00 (0.47,2.13)                |
| <b>COA<sup>c</sup></b>                    |                                    |                                       |                                       |                                 |
| Week 2                                    | 1.00                               | 0.64 (0.38,1.07)                      | 0.79 (0.45,1.40)                      | 0.81 (0.44,1.49)                |
| Week 3                                    | 1.00                               | 1.10 (0.64,1.87)                      | 1.16 (0.63,2.11)                      | 1.22 (0.63,2.36)                |
| Week 4                                    | 1.00                               | 1.03 (0.60,1.77)                      | 1.07 (0.58,1.97)                      | 0.85 (0.43,1.66)                |
| Week 5                                    | 1.00                               | 0.55 (0.32,0.94)                      | 0.72 (0.39,1.31)                      | 0.94 (0.49,1.80)                |
| Week 6                                    | 1.00                               | 1.38 (0.82,2.33)                      | 1.34 (0.72,2.49)                      | 1.37 (0.70,2.70)                |
| Week 7                                    | 1.00                               | 1.11 (0.66,1.87)                      | 0.97 (0.53,1.77)                      | 1.27 (0.66,2.44)                |
| Week 8                                    | 1.00                               | 0.81 (0.50,1.31)                      | 0.83 (0.48,1.42)                      | 0.75 (0.41,1.36)                |
| <b>HLHS<sup>c</sup></b>                   |                                    |                                       |                                       |                                 |
| Week 2                                    | 1.00                               | 0.89 (0.55,1.43)                      | 0.85 (0.49,1.47)                      | 0.78 (0.43,1.44)                |
| Week 3                                    | 1.00                               | 1.07 (0.65,1.77)                      | 0.85 (0.47,1.52)                      | 0.97 (0.51,1.84)                |
| Week 4                                    | 1.00                               | 0.86 (0.52,1.42)                      | 0.89 (0.50,1.59)                      | 0.77 (0.40,1.47)                |
| Week 5                                    | 1.00                               | 0.76 (0.46,1.26)                      | 0.93 (0.52,1.66)                      | 0.79 (0.41,1.52)                |
| Week 6                                    | 1.00                               | 1.57 (0.94,2.62)                      | 1.47 (0.81,2.68)                      | 1.30 (0.66,2.54)                |
| Week 7                                    | 1.00                               | 1.20 (0.73,1.99)                      | 1.03 (0.58,1.83)                      | 0.90 (0.47,1.72)                |
| Week 8                                    | 1.00                               | 1.10 (0.68,1.79)                      | 1.25 (0.73,2.14)                      | 1.65 (0.91,2.99)                |
| <b>Conotruncal<sup>b</sup></b>            |                                    |                                       |                                       |                                 |
| Week 2                                    | 1.00                               | 1.03 (0.76,1.39)                      | 0.73 (0.51,1.05)                      | 0.99 (0.67,1.46)                |
| Week 3                                    | 1.00                               | 1.26 (0.91,1.75)                      | 1.27 (0.87,1.86)                      | 1.19 (0.77,1.82)                |
| Week 4                                    | 1.00                               | 1.13 (0.81,1.57)                      | 0.85 (0.58,1.26)                      | 0.86 (0.56,1.33)                |
| Week 5                                    | 1.00                               | 1.14 (0.82,1.58)                      | 1.36 (0.92,2.01)                      | 1.38 (0.89,2.15)                |
| Week 6                                    | 1.00                               | 1.00 (0.73,1.38)                      | 1.04 (0.71,1.52)                      | 0.83 (0.53,1.29)                |
| Week 7                                    | 1.00                               | 0.84 (0.61,1.15)                      | 0.75 (0.52,1.09)                      | 0.75 (0.49,1.14)                |
| Week 8                                    | 1.00                               | 1.05 (0.78,1.41)                      | 1.01 (0.71,1.42)                      | 1.11 (0.75,1.63)                |
| <b>d-TGA<sup>c</sup></b>                  |                                    |                                       |                                       |                                 |
| Week 2                                    | 1.00                               | 0.92 (0.58,1.47)                      | 1.01 (0.60,1.71)                      | 0.89 (0.50,1.59)                |
| Week 3                                    | 1.00                               | 1.33 (0.82,2.16)                      | 1.25 (0.72,2.18)                      | 1.18 (0.64,2.20)                |

| <b>Exposure and Defect</b>        | <b>&lt;10<sup>th</sup> centile</b> | <b>10-&lt;50<sup>th</sup> centile</b> | <b>50-&lt;90<sup>th</sup> centile</b> | <b>≥90<sup>th</sup> centile</b> |
|-----------------------------------|------------------------------------|---------------------------------------|---------------------------------------|---------------------------------|
| Week 4                            | 1.00                               | 0.88 (0.54,1.43)                      | 0.76 (0.44,1.34)                      | 0.83 (0.45,1.54)                |
| Week 5                            | 1.00                               | 1.29 (0.80,2.09)                      | 1.53 (0.86,2.69)                      | 1.27 (0.67,2.41)                |
| Week 6                            | 1.00                               | 0.86 (0.53,1.39)                      | 1.13 (0.65,1.95)                      | 0.91 (0.48,1.70)                |
| Week 7                            | 1.00                               | 0.59 (0.37,0.95)                      | 0.66 (0.39,1.12)                      | 0.64 (0.35,1.17)                |
| Week 8                            | 1.00                               | 1.48 (0.96,2.29)                      | 0.91 (0.53,1.54)                      | 1.18 (0.67,2.09)                |
| TOF <sup>c</sup>                  |                                    |                                       |                                       |                                 |
| Week 2                            | 1.00                               | 1.11 (0.76,1.63)                      | 0.60 (0.37,0.96)                      | 1.13 (0.70,1.84)                |
| Week 3                            | 1.00                               | 1.25 (0.83,1.89)                      | 1.26 (0.78,2.02)                      | 1.13 (0.66,1.94)                |
| Week 4                            | 1.00                               | 1.21 (0.80,1.83)                      | 0.88 (0.54,1.45)                      | 0.81 (0.47,1.40)                |
| Week 5                            | 1.00                               | 1.03 (0.68,1.56)                      | 1.16 (0.71,1.90)                      | 1.31 (0.76,2.26)                |
| Week 6                            | 1.00                               | 1.09 (0.72,1.65)                      | 1.09 (0.67,1.77)                      | 0.88 (0.50,1.52)                |
| Week 7                            | 1.00                               | 1.02 (0.68,1.53)                      | 0.84 (0.52,1.35)                      | 0.89 (0.53,1.51)                |
| Week 8                            | 1.00                               | 0.90 (0.61,1.32)                      | 1.01 (0.66,1.56)                      | 1.03 (0.63,1.68)                |
| Other conotruncals <sup>c,d</sup> |                                    |                                       |                                       |                                 |
| Week 2                            | 1.00                               | 1.03 (0.55,1.93)                      | 0.62 (0.30,1.29)                      | 0.89 (0.42,1.91)                |
| Week 3                            | 1.00                               | 1.12 (0.57,2.18)                      | 1.27 (0.61,2.64)                      | 1.32 (0.59,2.99)                |
| Week 4                            | 1.00                               | 1.63 (0.83,3.21)                      | 1.01 (0.46,2.21)                      | 1.20 (0.52,2.78)                |
| Week 5                            | 1.00                               | 0.89 (0.45,1.74)                      | 1.16 (0.55,2.44)                      | 1.36 (0.59,3.11)                |
| Week 6                            | 1.00                               | 1.28 (0.67,2.47)                      | 0.90 (0.43,1.91)                      | 0.72 (0.31,1.70)                |
| Week 7                            | 1.00                               | 0.98 (0.52,1.88)                      | 0.74 (0.36,1.53)                      | 0.64 (0.28,1.46)                |
| Week 8                            | 1.00                               | 0.71 (0.37,1.39)                      | 1.23 (0.63,2.40)                      | 1.19 (0.56,2.57)                |
| APVR <sup>b</sup>                 |                                    |                                       |                                       |                                 |
| Week 2                            | 1.00                               | 0.77 (0.38,1.56)                      | 1.01 (0.48,2.10)                      | 1.19 (0.54,2.59)                |
| Week 3                            | 1.00                               | 0.97 (0.48,1.96)                      | 1.44 (0.69,3.02)                      | 0.94 (0.41,2.17)                |
| Week 4                            | 1.00                               | 1.04 (0.52,2.10)                      | 0.90 (0.41,1.95)                      | 0.99 (0.43,2.31)                |
| Week 5                            | 1.00                               | 1.18 (0.59,2.36)                      | 1.19 (0.55,2.58)                      | 0.96 (0.41,2.25)                |
| Week 6                            | 1.00                               | 0.90 (0.45,1.78)                      | 0.91 (0.42,1.96)                      | 1.07 (0.46,2.48)                |
| Week 7                            | 1.00                               | 0.98 (0.50,1.91)                      | 0.71 (0.33,1.53)                      | 0.87 (0.38,1.99)                |
| Week 8                            | 1.00                               | 1.05 (0.55,2.00)                      | 0.95 (0.46,1.95)                      | 1.04 (0.47,2.28)                |
| TAPVR <sup>c</sup>                |                                    |                                       |                                       |                                 |
| Week 2                            | 1.00                               | 0.71 (0.34,1.50)                      | 1.18 (0.56,2.48)                      | 1.36 (0.62,2.97)                |
| Week 3                            | 1.00                               | 0.95 (0.46,1.97)                      | 1.42 (0.68,2.97)                      | 0.85 (0.37,1.96)                |
| Week 4                            | 1.00                               | 0.98 (0.48,2.00)                      | 0.80 (0.37,1.75)                      | 0.98 (0.43,2.24)                |
| Week 5                            | 1.00                               | 1.55 (0.77,3.14)                      | 1.38 (0.63,3.02)                      | 1.00 (0.42,2.38)                |
| Week 6                            | 1.00                               | 0.80 (0.39,1.62)                      | 0.95 (0.44,2.04)                      | 1.05 (0.45,2.42)                |
| Week 7                            | 1.00                               | 1.07 (0.54,2.11)                      | 0.72 (0.33,1.57)                      | 0.85 (0.37,1.93)                |
| Week 8                            | 1.00                               | 1.09 (0.56,2.11)                      | 1.00 (0.48,2.09)                      | 1.14 (0.52,2.53)                |
| AVSD <sup>b</sup>                 |                                    |                                       |                                       |                                 |
| Week 2                            | 1.00                               | 1.17 (0.51,2.68)                      | 1.03 (0.42,2.51)                      | 1.36 (0.53,3.49)                |
| Week 3                            | 1.00                               | 1.03 (0.45,2.37)                      | 0.92 (0.37,2.28)                      | 1.34 (0.51,3.50)                |
| Week 4                            | 1.00                               | 1.38 (0.60,3.17)                      | 0.91 (0.35,2.37)                      | 1.60 (0.60,4.23)                |
| Week 5                            | 1.00                               | 0.61 (0.27,1.39)                      | 0.62 (0.25,1.55)                      | 0.81 (0.31,2.16)                |
| Week 6                            | 1.00                               | 1.69 (0.77,3.71)                      | 0.88 (0.36,2.18)                      | 0.41 (0.14,1.17)                |
| Week 7                            | 1.00                               | 0.92 (0.42,2.03)                      | 0.53 (0.21,1.34)                      | 0.85 (0.33,2.20)                |

| <b>Exposure and Defect</b>               | <b>&lt;10<sup>th</sup> centile</b> | <b>10-&lt;50<sup>th</sup> centile</b> | <b>50-&lt;90<sup>th</sup> centile</b> | <b>≥90<sup>th</sup> centile</b> |
|------------------------------------------|------------------------------------|---------------------------------------|---------------------------------------|---------------------------------|
| Week 8                                   | 1.00                               | 0.85 (0.36,2.00)                      | 1.61 (0.69,3.72)                      | 1.39 (0.54,3.57)                |
| RVOTO <sup>b</sup>                       |                                    |                                       |                                       |                                 |
| Week 2                                   | 1.00                               | 0.87 (0.59,1.28)                      | 0.61 (0.39,0.95)                      | 0.72 (0.45,1.14)                |
| Week 3                                   | 1.00                               | 1.18 (0.78,1.80)                      | 1.86 (1.16,2.98)                      | 2.01 (1.21,3.36)                |
| Week 4                                   | 1.00                               | 0.91 (0.59,1.38)                      | 1.06 (0.66,1.71)                      | 0.84 (0.50,1.42)                |
| Week 5                                   | 1.00                               | 1.01 (0.67,1.52)                      | 1.02 (0.63,1.64)                      | 1.07 (0.64,1.80)                |
| Week 6                                   | 1.00                               | 1.07 (0.71,1.60)                      | 1.22 (0.76,1.95)                      | 1.13 (0.67,1.89)                |
| Week 7                                   | 1.00                               | 0.74 (0.50,1.10)                      | 0.64 (0.41,1.00)                      | 0.67 (0.41,1.09)                |
| Week 8                                   | 1.00                               | 1.17 (0.81,1.69)                      | 1.08 (0.71,1.65)                      | 1.24 (0.78,1.96)                |
| Pulmonary/tricuspid atresia <sup>c</sup> |                                    |                                       |                                       |                                 |
| Week 2                                   | 1.00                               | 1.05 (0.52,2.08)                      | 0.63 (0.29,1.36)                      | 1.15 (0.53,2.49)                |
| Week 3                                   | 1.00                               | 1.06 (0.51,2.19)                      | 1.66 (0.78,3.52)                      | 1.27 (0.55,2.91)                |
| Week 4                                   | 1.00                               | 0.88 (0.42,1.81)                      | 1.02 (0.48,2.18)                      | 0.83 (0.36,1.92)                |
| Week 5                                   | 1.00                               | 0.78 (0.38,1.62)                      | 1.24 (0.58,2.62)                      | 1.02 (0.44,2.33)                |
| Week 6                                   | 1.00                               | 1.06 (0.53,2.15)                      | 1.17 (0.55,2.51)                      | 1.17 (0.51,2.69)                |
| Week 7                                   | 1.00                               | 0.69 (0.35,1.37)                      | 0.71 (0.34,1.49)                      | 0.76 (0.34,1.70)                |
| Week 8                                   | 1.00                               | 1.98 (1.03,3.82)                      | 1.29 (0.61,2.72)                      | 1.22 (0.55,2.70)                |
| PVS <sup>c</sup>                         |                                    |                                       |                                       |                                 |
| Week 2                                   | 1.00                               | 0.78 (0.51,1.20)                      | 0.60 (0.37,0.97)                      | 0.59 (0.35,0.99)                |
| Week 3                                   | 1.00                               | 1.30 (0.81,2.08)                      | 1.93 (1.15,3.25)                      | 2.15 (1.22,3.78)                |
| Week 4                                   | 1.00                               | 1.08 (0.67,1.73)                      | 1.16 (0.69,1.98)                      | 0.94 (0.53,1.68)                |
| Week 5                                   | 1.00                               | 1.08 (0.68,1.71)                      | 1.02 (0.60,1.73)                      | 1.11 (0.63,1.98)                |
| Week 6                                   | 1.00                               | 1.14 (0.73,1.81)                      | 1.32 (0.78,2.22)                      | 1.24 (0.70,2.22)                |
| Week 7                                   | 1.00                               | 0.75 (0.48,1.16)                      | 0.59 (0.36,0.97)                      | 0.66 (0.38,1.14)                |
| Week 8                                   | 1.00                               | 0.90 (0.60,1.37)                      | 0.94 (0.59,1.50)                      | 1.14 (0.69,1.90)                |
| Septal <sup>b</sup>                      |                                    |                                       |                                       |                                 |
| Week 2                                   | 1.00                               | 1.02 (0.79,1.31)                      | 0.72 (0.53,0.97)                      | 0.83 (0.60,1.16)                |
| Week 3                                   | 1.00                               | 1.00 (0.77,1.30)                      | 0.90 (0.66,1.24)                      | 0.95 (0.67,1.36)                |
| Week 4                                   | 1.00                               | 1.10 (0.84,1.45)                      | 1.07 (0.77,1.49)                      | 1.00 (0.69,1.45)                |
| Week 5                                   | 1.00                               | 1.16 (0.88,1.53)                      | 1.40 (1.01,1.95)                      | 1.58 (1.09,2.29)                |
| Week 6                                   | 1.00                               | 1.09 (0.83,1.42)                      | 1.09 (0.79,1.51)                      | 0.87 (0.60,1.26)                |
| Week 7                                   | 1.00                               | 0.73 (0.56,0.95)                      | 0.57 (0.42,0.77)                      | 0.68 (0.48,0.96)                |
| Week 8                                   | 1.00                               | 1.17 (0.91,1.51)                      | 1.13 (0.84,1.52)                      | 1.33 (0.95,1.86)                |
| VSD <sub>pm</sub> <sup>c</sup>           |                                    |                                       |                                       |                                 |
| Week 2                                   | 1.00                               | 0.92 (0.64,1.32)                      | 0.86 (0.57,1.31)                      | 0.97 (0.61,1.52)                |
| Week 3                                   | 1.00                               | 1.11 (0.76,1.62)                      | 1.07 (0.69,1.66)                      | 1.02 (0.63,1.66)                |
| Week 4                                   | 1.00                               | 1.15 (0.78,1.71)                      | 1.05 (0.66,1.66)                      | 1.15 (0.70,1.90)                |
| Week 5                                   | 1.00                               | 1.21 (0.82,1.78)                      | 1.22 (0.77,1.93)                      | 1.33 (0.80,2.20)                |
| Week 6                                   | 1.00                               | 1.09 (0.75,1.60)                      | 1.16 (0.74,1.81)                      | 1.08 (0.65,1.79)                |
| Week 7                                   | 1.00                               | 0.74 (0.51,1.06)                      | 0.49 (0.32,0.75)                      | 0.56 (0.35,0.89)                |
| Week 8                                   | 1.00                               | 1.13 (0.79,1.60)                      | 0.98 (0.65,1.48)                      | 1.43 (0.91,2.24)                |
| ASD <sup>c</sup>                         |                                    |                                       |                                       |                                 |
| Week 2                                   | 1.00                               | 1.18 (0.87,1.61)                      | 0.64 (0.44,0.94)                      | 0.77 (0.50,1.18)                |

| <b>Exposure and Defect</b>                 | <b>&lt;10<sup>th</sup> centile</b> | <b>10-&lt;50<sup>th</sup> centile</b> | <b>50-&lt;90<sup>th</sup> centile</b> | <b>≥90<sup>th</sup> centile</b> |
|--------------------------------------------|------------------------------------|---------------------------------------|---------------------------------------|---------------------------------|
| Week 3                                     | 1.00                               | 0.94 (0.68,1.29)                      | 0.82 (0.56,1.21)                      | 0.92 (0.59,1.43)                |
| Week 4                                     | 1.00                               | 1.17 (0.83,1.63)                      | 1.16 (0.78,1.72)                      | 0.90 (0.56,1.44)                |
| Week 5                                     | 1.00                               | 1.09 (0.78,1.54)                      | 1.40 (0.93,2.10)                      | 1.76 (1.11,2.80)                |
| Week 6                                     | 1.00                               | 1.04 (0.75,1.45)                      | 1.02 (0.69,1.52)                      | 0.72 (0.45,1.16)                |
| Week 7                                     | 1.00                               | 0.79 (0.57,1.09)                      | 0.71 (0.48,1.05)                      | 0.94 (0.60,1.45)                |
| Week 8                                     | 1.00                               | 1.27 (0.92,1.74)                      | 1.24 (0.86,1.80)                      | 1.17 (0.76,1.81)                |
| <b>PM<sub>10</sub> (µg/m<sup>3</sup>)</b>  |                                    |                                       |                                       |                                 |
| Week 2                                     | <11                                | 11.0-<23.0                            | 23.0-<46.2                            | ≥46.2                           |
| Week 3                                     | <11                                | 11.0-<23.0                            | 23.0-<46.0                            | ≥46.0                           |
| Week 4                                     | <11                                | 11.0-<23.0                            | 23.0-<45.0                            | ≥45.0                           |
| Week 5                                     | <11                                | 11.0-<23.0                            | 23.0-<46.0                            | ≥46.0                           |
| Week 6                                     | <11                                | 11.0-<23.0                            | 23.0-<47.0                            | ≥47.0                           |
| Week 7                                     | <11                                | 11.0-<23.0                            | 23.0-<46.0                            | ≥46.0                           |
| Week 8                                     | <11                                | 11.0-<22.0                            | 22.0-<45.0                            | ≥45.0                           |
| <b>LVOTO<sup>b</sup><br/>[OR (95% CI)]</b> |                                    |                                       |                                       |                                 |
| Week 2                                     | 1.00                               | 0.98 (0.66,1.43)                      | 1.10 (0.74,1.63)                      | 0.91 (0.55,1.51)                |
| Week 3                                     | 1.00                               | 0.89 (0.61,1.28)                      | 0.89 (0.61,1.30)                      | 0.85 (0.52,1.39)                |
| Week 4                                     | 1.00                               | 0.95 (0.65,1.39)                      | 1.00 (0.68,1.48)                      | 1.09 (0.66,1.77)                |
| Week 5                                     | 1.00                               | 1.10 (0.75,1.63)                      | 1.25 (0.84,1.86)                      | 0.88 (0.52,1.49)                |
| Week 6                                     | 1.00                               | 0.98 (0.67,1.43)                      | 0.98 (0.66,1.44)                      | 0.86 (0.51,1.45)                |
| Week 7                                     | 1.00                               | 1.43 (0.94,2.18)                      | 1.38 (0.90,2.12)                      | 1.53 (0.90,2.60)                |
| Week 8                                     | 1.00                               | 0.63 (0.44,0.91)                      | 0.81 (0.56,1.16)                      | 1.05 (0.66,1.65)                |
| <b>Aortic stenosis<sup>c</sup></b>         |                                    |                                       |                                       |                                 |
| Week 2                                     | 1.00                               | 1.02 (0.51,2.05)                      | 1.54 (0.77,3.07)                      | 1.00 (0.41,2.41)                |
| Week 3                                     | 1.00                               | 1.35 (0.71,2.57)                      | 1.03 (0.53,2.00)                      | 0.51 (0.18,1.42)                |
| Week 4                                     | 1.00                               | 0.94 (0.49,1.81)                      | 1.12 (0.58,2.14)                      | 0.96 (0.41,2.23)                |
| Week 5                                     | 1.00                               | 0.90 (0.49,1.64)                      | 0.88 (0.47,1.63)                      | 0.72 (0.30,1.73)                |
| Week 6                                     | 1.00                               | 0.73 (0.41,1.31)                      | 0.64 (0.35,1.17)                      | 0.77 (0.34,1.76)                |
| Week 7                                     | 1.00                               | 0.89 (0.48,1.66)                      | 1.06 (0.57,1.98)                      | 0.82 (0.35,1.96)                |
| Week 8                                     | 1.00                               | 0.46 (0.25,0.85)                      | 0.82 (0.46,1.46)                      | 1.02 (0.48,2.17)                |
| <b>COA<sup>c</sup></b>                     |                                    |                                       |                                       |                                 |
| Week 2                                     | 1.00                               | 1.24 (0.70,2.19)                      | 1.19 (0.67,2.12)                      | 0.81 (0.38,1.73)                |
| Week 3                                     | 1.00                               | 0.91 (0.54,1.53)                      | 0.87 (0.51,1.49)                      | 1.12 (0.57,2.22)                |
| Week 4                                     | 1.00                               | 1.02 (0.58,1.78)                      | 1.07 (0.61,1.87)                      | 1.10 (0.54,2.22)                |
| Week 5                                     | 1.00                               | 1.78 (0.94,3.38)                      | 1.71 (0.90,3.26)                      | 1.13 (0.51,2.54)                |
| Week 6                                     | 1.00                               | 1.03 (0.59,1.77)                      | 0.93 (0.53,1.63)                      | 0.99 (0.48,2.04)                |
| Week 7                                     | 1.00                               | 1.40 (0.75,2.60)                      | 1.54 (0.83,2.87)                      | 1.82 (0.86,3.82)                |
| Week 8                                     | 1.00                               | 1.05 (0.58,1.89)                      | 1.22 (0.68,2.18)                      | 1.44 (0.71,2.90)                |
| <b>HLHS<sup>c</sup></b>                    |                                    |                                       |                                       |                                 |
| Week 2                                     | 1.00                               | 0.76 (0.45,1.29)                      | 0.84 (0.50,1.43)                      | 0.91 (0.47,1.77)                |
| Week 3                                     | 1.00                               | 0.66 (0.39,1.10)                      | 0.91 (0.54,1.51)                      | 0.90 (0.47,1.75)                |
| Week 4                                     | 1.00                               | 0.92 (0.54,1.58)                      | 0.89 (0.52,1.54)                      | 1.01 (0.52,1.98)                |
| Week 5                                     | 1.00                               | 0.89 (0.51,1.55)                      | 1.32 (0.77,2.29)                      | 0.97 (0.47,1.98)                |

| <b>Exposure and Defect</b>              | <b>&lt;10<sup>th</sup> centile</b> | <b>10-&lt;50<sup>th</sup> centile</b> | <b>50-&lt;90<sup>th</sup> centile</b> | <b>≥90<sup>th</sup> centile</b> |
|-----------------------------------------|------------------------------------|---------------------------------------|---------------------------------------|---------------------------------|
| Week 6                                  | 1.00                               | 1.12 (0.63,1.98)                      | 1.31 (0.74,2.34)                      | 0.89 (0.42,1.88)                |
| Week 7                                  | 1.00                               | 1.97 (1.02,3.82)                      | 1.46 (0.75,2.86)                      | 1.69 (0.78,3.64)                |
| Week 8                                  | 1.00                               | 0.62 (0.37,1.03)                      | 0.72 (0.43,1.19)                      | 0.98 (0.52,1.85)                |
| <b>Conotruncal<sup>b</sup></b>          |                                    |                                       |                                       |                                 |
| Week 2                                  | 1.00                               | 1.01 (0.70,1.46)                      | 1.12 (0.77,1.62)                      | 1.00 (0.63,1.59)                |
| Week 3                                  | 1.00                               | 1.02 (0.71,1.46)                      | 1.00 (0.69,1.44)                      | 1.11 (0.7,1.75)                 |
| Week 4                                  | 1.00                               | 0.76 (0.54,1.08)                      | 0.83 (0.58,1.18)                      | 0.98 (0.63,1.53)                |
| Week 5                                  | 1.00                               | 1.12 (0.78,1.62)                      | 1.19 (0.82,1.74)                      | 1.22 (0.76,1.95)                |
| Week 6                                  | 1.00                               | 0.89 (0.63,1.26)                      | 0.72 (0.50,1.03)                      | 0.90 (0.57,1.42)                |
| Week 7                                  | 1.00                               | 1.04 (0.73,1.50)                      | 1.11 (0.77,1.62)                      | 1.14 (0.72,1.82)                |
| Week 8                                  | 1.00                               | 0.71 (0.50,1.01)                      | 1.01 (0.71,1.43)                      | 1.06 (0.69,1.65)                |
| <b>d-TGA<sup>c</sup></b>                |                                    |                                       |                                       |                                 |
| Week 2                                  | 1.00                               | 1.04 (0.61,1.80)                      | 0.93 (0.53,1.64)                      | 1.00 (0.50,1.97)                |
| Week 3                                  | 1.00                               | 0.79 (0.47,1.32)                      | 0.76 (0.45,1.29)                      | 1.05 (0.55,2.01)                |
| Week 4                                  | 1.00                               | 0.78 (0.46,1.31)                      | 0.84 (0.49,1.43)                      | 1.07 (0.56,2.06)                |
| Week 5                                  | 1.00                               | 0.81 (0.48,1.35)                      | 0.88 (0.52,1.49)                      | 0.92 (0.47,1.80)                |
| Week 6                                  | 1.00                               | 1.25 (0.71,2.21)                      | 0.89 (0.50,1.61)                      | 1.10 (0.54,2.24)                |
| Week 7                                  | 1.00                               | 1.16 (0.66,2.04)                      | 1.30 (0.74,2.30)                      | 1.07 (0.53,2.19)                |
| Week 8                                  | 1.00                               | 0.92 (0.50,1.66)                      | 1.44 (0.80,2.58)                      | 1.52 (0.76,3.03)                |
| <b>TOF<sup>c</sup></b>                  |                                    |                                       |                                       |                                 |
| Week 2                                  | 1.00                               | 1.09 (0.68,1.74)                      | 1.26 (0.78,2.04)                      | 1.14 (0.63,2.05)                |
| Week 3                                  | 1.00                               | 1.18 (0.74,1.88)                      | 1.10 (0.68,1.76)                      | 1.10 (0.61,1.98)                |
| Week 4                                  | 1.00                               | 0.69 (0.45,1.05)                      | 0.82 (0.53,1.26)                      | 0.87 (0.50,1.51)                |
| Week 5                                  | 1.00                               | 1.62 (0.96,2.74)                      | 1.66 (0.97,2.83)                      | 1.62 (0.86,3.05)                |
| Week 6                                  | 1.00                               | 0.84 (0.55,1.28)                      | 0.71 (0.46,1.10)                      | 0.81 (0.46,1.43)                |
| Week 7                                  | 1.00                               | 0.92 (0.59,1.43)                      | 0.93 (0.59,1.46)                      | 1.09 (0.62,1.92)                |
| Week 8                                  | 1.00                               | 0.58 (0.38,0.89)                      | 0.87 (0.57,1.31)                      | 0.95 (0.56,1.62)                |
| <b>Other conotruncals<sup>c,d</sup></b> |                                    |                                       |                                       |                                 |
| Week 2                                  | 1.00                               | 0.70 (0.35,1.40)                      | 1.03 (0.53,2.02)                      | 0.63 (0.25,1.57)                |
| Week 3                                  | 1.00                               | 0.99 (0.47,2.10)                      | 1.19 (0.57,2.48)                      | 1.12 (0.46,2.74)                |
| Week 4                                  | 1.00                               | 1.10 (0.53,2.28)                      | 0.82 (0.39,1.73)                      | 1.12 (0.47,2.68)                |
| Week 5                                  | 1.00                               | 0.76 (0.38,1.49)                      | 0.86 (0.43,1.69)                      | 1.02 (0.43,2.39)                |
| Week 6                                  | 1.00                               | 0.65 (0.34,1.27)                      | 0.61 (0.31,1.20)                      | 1.00 (0.44,2.29)                |
| Week 7                                  | 1.00                               | 1.17 (0.54,2.54)                      | 1.31 (0.61,2.83)                      | 1.41 (0.57,3.49)                |
| Week 8                                  | 1.00                               | 0.86 (0.43,1.72)                      | 0.83 (0.42,1.66)                      | 0.77 (0.32,1.84)                |
| <b>APVR<sup>b</sup></b>                 |                                    |                                       |                                       |                                 |
| Week 2                                  | 1.00                               | 1.19 (0.51,2.77)                      | 1.77 (0.78,4.05)                      | 0.93 (0.34,2.54)                |
| Week 3                                  | 1.00                               | 0.97 (0.45,2.07)                      | 1.02 (0.48,2.18)                      | 1.56 (0.64,3.77)                |
| Week 4                                  | 1.00                               | 1.01 (0.49,2.11)                      | 1.09 (0.53,2.24)                      | 0.65 (0.25,1.68)                |
| Week 5                                  | 1.00                               | 0.73 (0.34,1.55)                      | 1.23 (0.60,2.52)                      | 1.58 (0.66,3.78)                |
| Week 6                                  | 1.00                               | 1.19 (0.56,2.54)                      | 0.96 (0.45,2.04)                      | 0.89 (0.35,2.31)                |
| Week 7                                  | 1.00                               | 1.78 (0.78,4.08)                      | 1.22 (0.53,2.82)                      | 1.28 (0.49,3.38)                |
| Week 8                                  | 1.00                               | 0.45 (0.23,0.85)                      | 0.46 (0.25,0.88)                      | 0.93 (0.43,2.02)                |

| <b>Exposure and Defect</b>                     | <b>&lt;10<sup>th</sup> centile</b> | <b>10-&lt;50<sup>th</sup> centile</b> | <b>50-&lt;90<sup>th</sup> centile</b> | <b>≥90<sup>th</sup> centile</b> |
|------------------------------------------------|------------------------------------|---------------------------------------|---------------------------------------|---------------------------------|
| <b>TAPVR<sup>c</sup></b>                       |                                    |                                       |                                       |                                 |
| Week 2                                         | 1.00                               | 1.05 (0.46,2.42)                      | 1.57 (0.70,3.53)                      | 0.88 (0.33,2.36)                |
| Week 3                                         | 1.00                               | 0.82 (0.38,1.76)                      | 0.92 (0.43,1.95)                      | 1.52 (0.64,3.63)                |
| Week 4                                         | 1.00                               | 0.85 (0.41,1.78)                      | 1.06 (0.52,2.17)                      | 0.65 (0.25,1.67)                |
| Week 5                                         | 1.00                               | 0.69 (0.33,1.47)                      | 1.07 (0.52,2.20)                      | 1.58 (0.67,3.74)                |
| Week 6                                         | 1.00                               | 1.19 (0.57,2.52)                      | 0.84 (0.39,1.80)                      | 0.76 (0.29,1.99)                |
| Week 7                                         | 1.00                               | 1.64 (0.72,3.70)                      | 1.17 (0.51,2.67)                      | 1.12 (0.42,2.93)                |
| Week 8                                         | 1.00                               | 0.48 (0.25,0.92)                      | 0.47 (0.24,0.91)                      | 0.99 (0.45,2.17)                |
| <b>AVSD<sup>b</sup></b>                        |                                    |                                       |                                       |                                 |
| Week 2                                         | 1.00                               | 0.98 (0.38,2.53)                      | 0.97 (0.38,2.51)                      | 1.76 (0.61,5.08)                |
| Week 3                                         | 1.00                               | 0.74 (0.28,1.95)                      | 1.83 (0.73,4.55)                      | 1.19 (0.23,6.12)                |
| Week 4                                         | 1.00                               | 1.52 (0.52,4.39)                      | 1.30 (0.46,3.69)                      | 0.75 (0.19,2.96)                |
| Week 5                                         | 1.00                               | 0.75 (0.29,1.95)                      | 1.63 (0.65,4.05)                      | 1.18 (0.23,6.11)                |
| Week 6                                         | 1.00                               | 1.46 (0.56,3.79)                      | 0.95 (0.36,2.50)                      | 0.85 (0.25,2.91)                |
| Week 7                                         | 1.00                               | 1.25 (0.54,2.90)                      | 0.58 (0.23,1.46)                      | 1.92 (0.71,5.24)                |
| Week 8                                         | 1.00                               | 0.52 (0.23,1.20)                      | 0.79 (0.36,1.72)                      | 0.60 (0.18,1.94)                |
| <b>RVOTO<sup>b</sup></b>                       |                                    |                                       |                                       |                                 |
| Week 2                                         | 1.00                               | 1.10 (0.72,1.67)                      | 1.16 (0.76,1.79)                      | 0.83 (0.47,1.45)                |
| Week 3                                         | 1.00                               | 1.48 (0.95,2.30)                      | 1.28 (0.81,2.02)                      | 1.46 (0.83,2.55)                |
| Week 4                                         | 1.00                               | 1.12 (0.75,1.69)                      | 0.80 (0.52,1.22)                      | 1.04 (0.61,1.76)                |
| Week 5                                         | 1.00                               | 0.81 (0.55,1.18)                      | 0.84 (0.56,1.24)                      | 0.86 (0.51,1.45)                |
| Week 6                                         | 1.00                               | 0.97 (0.65,1.45)                      | 0.98 (0.65,1.48)                      | 0.94 (0.54,1.63)                |
| Week 7                                         | 1.00                               | 1.34 (0.86,2.10)                      | 1.49 (0.94,2.34)                      | 1.60 (0.92,2.81)                |
| Week 8                                         | 1.00                               | 0.86 (0.56,1.31)                      | 1.19 (0.78,1.82)                      | 1.27 (0.75,2.15)                |
| <b>Pulmonary/tricuspid atresia<sup>c</sup></b> |                                    |                                       |                                       |                                 |
| Week 2                                         | 1.00                               | 0.88 (0.44,1.75)                      | 0.9 (0.45,1.81)                       | 1.08 (0.46,2.57)                |
| Week 3                                         | 1.00                               | 1.50 (0.69,3.23)                      | 1.35 (0.62,2.93)                      | 0.79 (0.28,2.20)                |
| Week 4                                         | 1.00                               | 0.98 (0.53,1.83)                      | 0.50 (0.25,0.99)                      | 0.45 (0.17,1.21)                |
| Week 5                                         | 1.00                               | 1.27 (0.61,2.64)                      | 1.07 (0.50,2.25)                      | 1.23 (0.49,3.10)                |
| Week 6                                         | 1.00                               | 1.09 (0.52,2.29)                      | 1.11 (0.53,2.33)                      | 0.88 (0.34,2.27)                |
| Week 7                                         | 1.00                               | 0.82 (0.40,1.65)                      | 1.24 (0.62,2.46)                      | 1.25 (0.52,3.01)                |
| Week 8                                         | 1.00                               | 0.90 (0.44,1.84)                      | 0.83 (0.41,1.70)                      | 1.16 (0.49,2.74)                |
| <b>PVS<sup>c</sup></b>                         |                                    |                                       |                                       |                                 |
| Week 2                                         | 1.00                               | 1.25 (0.77,2.04)                      | 1.30 (0.79,2.14)                      | 0.76 (0.39,1.46)                |
| Week 3                                         | 1.00                               | 1.34 (0.82,2.17)                      | 1.14 (0.70,1.88)                      | 1.40 (0.76,2.58)                |
| Week 4                                         | 1.00                               | 1.35 (0.82,2.20)                      | 1.02 (0.61,1.69)                      | 1.40 (0.76,2.56)                |
| Week 5                                         | 1.00                               | 0.70 (0.46,1.07)                      | 0.80 (0.52,1.23)                      | 0.80 (0.44,1.42)                |
| Week 6                                         | 1.00                               | 1.07 (0.67,1.71)                      | 1.11 (0.69,1.78)                      | 1.15 (0.62,2.12)                |
| Week 7                                         | 1.00                               | 1.45 (0.88,2.41)                      | 1.41 (0.85,2.37)                      | 1.57 (0.84,2.95)                |
| Week 8                                         | 1.00                               | 0.83 (0.51,1.36)                      | 1.27 (0.79,2.05)                      | 1.43 (0.80,2.57)                |
| <b>Septal<sup>b</sup></b>                      |                                    |                                       |                                       |                                 |
| Week 2                                         | 1.00                               | 0.87 (0.66,1.16)                      | 0.90 (0.67,1.21)                      | 0.75 (0.50,1.12)                |
| Week 3                                         | 1.00                               | 1.18 (0.88,1.57)                      | 1.03 (0.76,1.39)                      | 1.00 (0.66,1.49)                |

| <b>Exposure and Defect</b>                 | <b>&lt;10<sup>th</sup> centile</b> | <b>10-&lt;50<sup>th</sup> centile</b> | <b>50-&lt;90<sup>th</sup> centile</b> | <b>≥90<sup>th</sup> centile</b> |
|--------------------------------------------|------------------------------------|---------------------------------------|---------------------------------------|---------------------------------|
| Week 4                                     | 1.00                               | 1.02 (0.76,1.35)                      | 0.98 (0.73,1.33)                      | 0.86 (0.57,1.29)                |
| Week 5                                     | 1.00                               | 1.20 (0.88,1.61)                      | 1.31 (0.96,1.78)                      | 1.46 (0.98,2.19)                |
| Week 6                                     | 1.00                               | 0.98 (0.74,1.29)                      | 0.90 (0.67,1.20)                      | 0.92 (0.62,1.38)                |
| Week 7                                     | 1.00                               | 0.94 (0.71,1.24)                      | 0.95 (0.71,1.27)                      | 0.88 (0.59,1.31)                |
| Week 8                                     | 1.00                               | 0.96 (0.72,1.28)                      | 1.05 (0.78,1.41)                      | 1.05 (0.71,1.55)                |
| <b>VSD<sub>pm</sub><sup>c</sup></b>        |                                    |                                       |                                       |                                 |
| Week 2                                     | 1.00                               | 0.84 (0.57,1.24)                      | 0.92 (0.62,1.36)                      | 0.87 (0.52,1.47)                |
| Week 3                                     | 1.00                               | 1.30 (0.86,1.96)                      | 1.16 (0.76,1.77)                      | 0.86 (0.48,1.52)                |
| Week 4                                     | 1.00                               | 1.13 (0.75,1.71)                      | 1.06 (0.70,1.62)                      | 0.90 (0.52,1.57)                |
| Week 5                                     | 1.00                               | 1.30 (0.84,2.00)                      | 1.30 (0.84,2.03)                      | 1.76 (1.02,3.03)                |
| Week 6                                     | 1.00                               | 0.87 (0.59,1.27)                      | 0.81 (0.55,1.20)                      | 0.75 (0.44,1.29)                |
| Week 7                                     | 1.00                               | 0.96 (0.65,1.42)                      | 0.91 (0.61,1.35)                      | 0.98 (0.58,1.66)                |
| Week 8                                     | 1.00                               | 1.01 (0.66,1.56)                      | 1.48 (0.96,2.28)                      | 1.24 (0.72,2.16)                |
| <b>ASD<sup>c</sup></b>                     |                                    |                                       |                                       |                                 |
| Week 2                                     | 1.00                               | 0.98 (0.67,1.41)                      | 0.98 (0.67,1.44)                      | 0.66 (0.38,1.15)                |
| Week 3                                     | 1.00                               | 1.16 (0.80,1.68)                      | 1.02 (0.69,1.50)                      | 1.13 (0.67,1.91)                |
| Week 4                                     | 1.00                               | 0.99 (0.68,1.42)                      | 0.95 (0.65,1.39)                      | 0.80 (0.48,1.36)                |
| Week 5                                     | 1.00                               | 1.04 (0.71,1.51)                      | 1.18 (0.80,1.73)                      | 1.13 (0.67,1.91)                |
| Week 6                                     | 1.00                               | 1.21 (0.83,1.76)                      | 1.03 (0.70,1.53)                      | 1.23 (0.73,2.08)                |
| Week 7                                     | 1.00                               | 1.00 (0.70,1.44)                      | 1.02 (0.70,1.49)                      | 0.91 (0.53,1.54)                |
| Week 8                                     | 1.00                               | 0.99 (0.69,1.43)                      | 0.90 (0.62,1.32)                      | 0.99 (0.60,1.64)                |
| <b>PM<sub>2.5</sub> (µg/m<sup>3</sup>)</b> |                                    |                                       |                                       |                                 |
| Week 2                                     | <6.0                               | 6.0-<11.6                             | 11.6-<22.6                            | ≥22.6                           |
| Week 3                                     | <6.2                               | 6.2-<11.7                             | 11.7-<22.5                            | ≥22.5                           |
| Week 4                                     | <5.9                               | 5.9-<11.6                             | 11.6-<22.1                            | ≥22.1                           |
| Week 5                                     | <5.9                               | 5.9-<11.6                             | 11.6-<22.1                            | ≥22.1                           |
| Week 6                                     | <6.0                               | 6.0-<11.6                             | 11.6-<22.6                            | ≥22.6                           |
| Week 7                                     | <6.0                               | 6.0-<11.6                             | 11.6-<22.5                            | ≥22.5                           |
| Week 8                                     | <5.9                               | 5.9-<11.4                             | 11.4-<22.2                            | ≥22.2                           |
| <b>LVOTO<sup>b</sup><br/>[OR (95% CI)]</b> |                                    |                                       |                                       |                                 |
| Week 2                                     | 1.00                               | 1.11 (0.79,1.55)                      | 1.10 (0.77,1.57)                      | 1.48 (0.94,2.33)                |
| Week 3                                     | 1.00                               | 0.69 (0.51,0.94)                      | 0.54 (0.38,0.75)                      | 0.52 (0.33,0.83)                |
| Week 4                                     | 1.00                               | 1.37 (0.96,1.96)                      | 1.28 (0.87,1.87)                      | 1.56 (0.97,2.51)                |
| Week 5                                     | 1.00                               | 1.01 (0.73,1.41)                      | 0.95 (0.67,1.36)                      | 1.12 (0.70,1.79)                |
| Week 6                                     | 1.00                               | 1.04 (0.74,1.47)                      | 1.09 (0.75,1.57)                      | 0.95 (0.58,1.55)                |
| Week 7                                     | 1.00                               | 1.16 (0.82,1.64)                      | 1.20 (0.84,1.73)                      | 1.23 (0.75,2.01)                |
| Week 8                                     | 1.00                               | 1.18 (0.85,1.64)                      | 1.01 (0.71,1.44)                      | 0.95 (0.59,1.53)                |
| <b>Aortic stenosis<sup>c</sup></b>         |                                    |                                       |                                       |                                 |
| Week 2                                     | 1.00                               | 1.09 (0.61,1.94)                      | 1.18 (0.65,2.16)                      | 1.70 (0.78,3.69)                |
| Week 3                                     | 1.00                               | 0.55 (0.33,0.89)                      | 0.42 (0.24,0.73)                      | 0.39 (0.17,0.88)                |
| Week 4                                     | 1.00                               | 1.42 (0.77,2.62)                      | 1.30 (0.68,2.48)                      | 1.67 (0.75,3.72)                |
| Week 5                                     | 1.00                               | 0.83 (0.48,1.45)                      | 1.28 (0.72,2.26)                      | 1.00 (0.43,2.31)                |
| Week 6                                     | 1.00                               | 1.59 (0.86,2.93)                      | 1.06 (0.55,2.05)                      | 0.81 (0.33,2.00)                |

| <b>Exposure and Defect</b>        | <b>&lt;10<sup>th</sup> centile</b> | <b>10-&lt;50<sup>th</sup> centile</b> | <b>50-&lt;90<sup>th</sup> centile</b> | <b>≥90<sup>th</sup> centile</b> |
|-----------------------------------|------------------------------------|---------------------------------------|---------------------------------------|---------------------------------|
| Week 7                            | 1.00                               | 1.03 (0.60,1.76)                      | 0.87 (0.48,1.56)                      | 0.95 (0.41,2.21)                |
| Week 8                            | 1.00                               | 1.18 (0.67,2.06)                      | 0.95 (0.52,1.73)                      | 1.04 (0.46,2.35)                |
| COA <sup>c</sup>                  |                                    |                                       |                                       |                                 |
| Week 2                            | 1.00                               | 1.18 (0.73,1.92)                      | 1.19 (0.71,1.98)                      | 1.40 (0.73,2.69)                |
| Week 3                            | 1.00                               | 0.82 (0.53,1.27)                      | 0.59 (0.36,0.95)                      | 0.52 (0.27,1.01)                |
| Week 4                            | 1.00                               | 1.37 (0.82,2.29)                      | 1.45 (0.85,2.48)                      | 1.61 (0.82,3.14)                |
| Week 5                            | 1.00                               | 0.99 (0.63,1.57)                      | 0.90 (0.55,1.46)                      | 0.98 (0.51,1.89)                |
| Week 6                            | 1.00                               | 0.71 (0.45,1.13)                      | 0.92 (0.57,1.49)                      | 0.96 (0.50,1.82)                |
| Week 7                            | 1.00                               | 1.23 (0.76,2.01)                      | 1.20 (0.72,2.00)                      | 1.15 (0.58,2.28)                |
| Week 8                            | 1.00                               | 1.47 (0.90,2.40)                      | 1.09 (0.64,1.83)                      | 1.15 (0.59,2.24)                |
| HLHS <sup>c</sup>                 |                                    |                                       |                                       |                                 |
| Week 2                            | 1.00                               | 1.01 (0.62,1.64)                      | 0.87 (0.52,1.46)                      | 1.18 (0.62,2.25)                |
| Week 3                            | 1.00                               | 0.79 (0.49,1.27)                      | 0.71 (0.43,1.18)                      | 0.79 (0.41,1.51)                |
| Week 4                            | 1.00                               | 1.11 (0.67,1.84)                      | 0.92 (0.54,1.56)                      | 1.13 (0.58,2.21)                |
| Week 5                            | 1.00                               | 1.24 (0.75,2.05)                      | 0.87 (0.50,1.51)                      | 1.52 (0.79,2.94)                |
| Week 6                            | 1.00                               | 1.11 (0.65,1.88)                      | 1.22 (0.71,2.12)                      | 0.91 (0.44,1.85)                |
| Week 7                            | 1.00                               | 1.25 (0.73,2.15)                      | 1.51 (0.86,2.63)                      | 1.62 (0.81,3.27)                |
| Week 8                            | 1.00                               | 0.85 (0.53,1.37)                      | 0.93 (0.57,1.54)                      | 0.72 (0.36,1.42)                |
| Conotruncal <sup>b</sup>          |                                    |                                       |                                       |                                 |
| Week 2                            | 1.00                               | 1.39 (0.98,1.97)                      | 1.29 (0.90,1.86)                      | 1.50 (0.96,2.35)                |
| Week 3                            | 1.00                               | 0.80 (0.59,1.09)                      | 0.72 (0.52,0.99)                      | 0.58 (0.38,0.9)                 |
| Week 4                            | 1.00                               | 0.95 (0.69,1.32)                      | 1.10 (0.78,1.55)                      | 1.11 (0.71,1.71)                |
| Week 5                            | 1.00                               | 1.01 (0.73,1.39)                      | 0.91 (0.65,1.28)                      | 0.91 (0.58,1.42)                |
| Week 6                            | 1.00                               | 1.02 (0.73,1.42)                      | 1.00 (0.70,1.42)                      | 0.89 (0.57,1.41)                |
| Week 7                            | 1.00                               | 1.28 (0.91,1.82)                      | 1.40 (0.97,2.01)                      | 1.52 (0.97,2.40)                |
| Week 8                            | 1.00                               | 0.90 (0.65,1.25)                      | 1.19 (0.85,1.66)                      | 1.23 (0.80,1.87)                |
| d-TGA <sup>c</sup>                |                                    |                                       |                                       |                                 |
| Week 2                            | 1.00                               | 1.20 (0.73,1.97)                      | 1.09 (0.65,1.83)                      | 0.96 (0.49,1.89)                |
| Week 3                            | 1.00                               | 0.79 (0.50,1.26)                      | 0.77 (0.47,1.26)                      | 0.47 (0.23,0.95)                |
| Week 4                            | 1.00                               | 1.04 (0.62,1.73)                      | 1.43 (0.85,2.43)                      | 1.31 (0.67,2.57)                |
| Week 5                            | 1.00                               | 0.92 (0.57,1.47)                      | 0.92 (0.56,1.51)                      | 0.97 (0.50,1.87)                |
| Week 6                            | 1.00                               | 0.82 (0.50,1.34)                      | 0.88 (0.53,1.46)                      | 1.15 (0.61,2.17)                |
| Week 7                            | 1.00                               | 1.18 (0.71,1.95)                      | 1.19 (0.70,2.01)                      | 1.32 (0.68,2.58)                |
| Week 8                            | 1.00                               | 1.28 (0.76,2.16)                      | 1.33 (0.77,2.28)                      | 1.17 (0.59,2.30)                |
| TOF <sup>c</sup>                  |                                    |                                       |                                       |                                 |
| Week 2                            | 1.00                               | 1.64 (1.02,2.63)                      | 1.41 (0.87,2.31)                      | 1.96 (1.11,3.46)                |
| Week 3                            | 1.00                               | 0.78 (0.53,1.16)                      | 0.70 (0.46,1.06)                      | 0.73 (0.43,1.24)                |
| Week 4                            | 1.00                               | 0.87 (0.58,1.31)                      | 0.96 (0.63,1.46)                      | 1.06 (0.63,1.81)                |
| Week 5                            | 1.00                               | 1.11 (0.73,1.68)                      | 1.05 (0.68,1.63)                      | 0.90 (0.51,1.58)                |
| Week 6                            | 1.00                               | 1.19 (0.77,1.84)                      | 1.09 (0.69,1.72)                      | 0.79 (0.44,1.41)                |
| Week 7                            | 1.00                               | 1.16 (0.75,1.80)                      | 1.41 (0.90,2.20)                      | 1.37 (0.79,2.40)                |
| Week 8                            | 1.00                               | 0.82 (0.54,1.23)                      | 1.14 (0.75,1.74)                      | 1.42 (0.85,2.37)                |
| Other conotruncals <sup>c,d</sup> |                                    |                                       |                                       |                                 |
| Week 2                            | 1.00                               | 0.99 (0.50,1.95)                      | 1.23 (0.62,2.45)                      | 1.13 (0.46,2.80)                |

| <b>Exposure and Defect</b>                     | <b>&lt;10<sup>th</sup> centile</b> | <b>10-&lt;50<sup>th</sup> centile</b> | <b>50-&lt;90<sup>th</sup> centile</b> | <b>≥90<sup>th</sup> centile</b> |
|------------------------------------------------|------------------------------------|---------------------------------------|---------------------------------------|---------------------------------|
| Week 3                                         | 1.00                               | 0.95 (0.50,1.79)                      | 0.73 (0.37,1.43)                      | 0.36 (0.13,1.01)                |
| Week 4                                         | 1.00                               | 1.17 (0.59,2.29)                      | 1.09 (0.54,2.19)                      | 0.83 (0.32,2.14)                |
| Week 5                                         | 1.00                               | 1.13 (0.59,2.16)                      | 0.65 (0.32,1.31)                      | 1.29 (0.55,3.02)                |
| Week 6                                         | 1.00                               | 0.93 (0.47,1.83)                      | 0.97 (0.48,1.94)                      | 0.82 (0.33,2.03)                |
| Week 7                                         | 1.00                               | 1.54 (0.70,3.41)                      | 1.27 (0.57,2.84)                      | 1.96 (0.78,4.90)                |
| Week 8                                         | 1.00                               | 0.60 (0.32,1.14)                      | 1.07 (0.57,1.99)                      | 0.63 (0.25,1.59)                |
| <b>APVR<sup>b</sup></b>                        |                                    |                                       |                                       |                                 |
| Week 2                                         | 1.00                               | 1.57 (0.79,3.16)                      | 1.14 (0.55,2.35)                      | 1.79 (0.76,4.22)                |
| Week 3                                         | 1.00                               | 0.61 (0.34,1.09)                      | 0.65 (0.35,1.22)                      | 0.77 (0.34,1.74)                |
| Week 4                                         | 1.00                               | 1.32 (0.67,2.59)                      | 1.28 (0.63,2.58)                      | 1.28 (0.53,3.08)                |
| Week 5                                         | 1.00                               | 1.46 (0.70,3.04)                      | 1.78 (0.85,3.75)                      | 1.60 (0.64,3.98)                |
| Week 6                                         | 1.00                               | 0.79 (0.44,1.42)                      | 0.48 (0.25,0.94)                      | 1.00 (0.45,2.24)                |
| Week 7                                         | 1.00                               | 1.27 (0.68,2.39)                      | 0.97 (0.49,1.90)                      | 1.02 (0.42,2.49)                |
| Week 8                                         | 1.00                               | 1.36 (0.70,2.66)                      | 1.03 (0.51,2.10)                      | 1.33 (0.56,3.16)                |
| <b>TAPVR<sup>c</sup></b>                       |                                    |                                       |                                       |                                 |
| Week 2                                         | 1.00                               | 1.43 (0.72,2.86)                      | 0.98 (0.47,2.04)                      | 1.67 (0.71,3.95)                |
| Week 3                                         | 1.00                               | 0.50 (0.27,0.91)                      | 0.62 (0.33,1.16)                      | 0.72 (0.31,1.64)                |
| Week 4                                         | 1.00                               | 1.11 (0.56,2.18)                      | 1.17 (0.58,2.35)                      | 1.39 (0.59,3.30)                |
| Week 5                                         | 1.00                               | 1.53 (0.68,3.40)                      | 1.70 (0.76,3.79)                      | 1.91 (0.75,4.84)                |
| Week 6                                         | 1.00                               | 0.88 (0.47,1.62)                      | 0.54 (0.27,1.07)                      | 0.93 (0.40,2.15)                |
| Week 7                                         | 1.00                               | 1.47 (0.75,2.87)                      | 1.14 (0.56,2.31)                      | 0.87 (0.33,2.27)                |
| Week 8                                         | 1.00                               | 1.54 (0.75,3.15)                      | 1.05 (0.50,2.23)                      | 1.27 (0.51,3.14)                |
| <b>AVSD<sup>b</sup></b>                        |                                    |                                       |                                       |                                 |
| Week 2                                         | 1.00                               | 1.27 (0.54,2.98)                      | 0.82 (0.34,1.99)                      | 3.43 (1.36,8.66)                |
| Week 3                                         | 1.00                               | 0.71 (0.31,1.65)                      | 1.44 (0.65,3.22)                      | 0.69 (0.24,2.00)                |
| Week 4                                         | 1.00                               | 1.56 (0.67,3.64)                      | 1.23 (0.52,2.92)                      | 1.19 (0.42,3.36)                |
| Week 5                                         | 1.00                               | 1.37 (0.61,3.07)                      | 1.19 (0.52,2.72)                      | 1.29 (0.47,3.57)                |
| Week 6                                         | 1.00                               | 1.23 (0.57,2.67)                      | 0.89 (0.40,1.99)                      | 0.48 (0.15,1.57)                |
| Week 7                                         | 1.00                               | 1.14 (0.48,2.71)                      | 1.32 (0.56,3.10)                      | 2.45 (0.92,6.50)                |
| Week 8                                         | 1.00                               | 0.96 (0.47,1.98)                      | 0.67 (0.31,1.44)                      | 1.07 (0.41,2.75)                |
| <b>RVOTO<sup>b</sup></b>                       |                                    |                                       |                                       |                                 |
| Week 2                                         | 1.00                               | 1.20 (0.84,1.71)                      | 0.92 (0.63,1.35)                      | 0.95 (0.57,1.57)                |
| Week 3                                         | 1.00                               | 0.74 (0.53,1.04)                      | 0.76 (0.53,1.09)                      | 0.71 (0.43,1.16)                |
| Week 4                                         | 1.00                               | 0.96 (0.68,1.37)                      | 0.98 (0.67,1.43)                      | 0.94 (0.57,1.54)                |
| Week 5                                         | 1.00                               | 1.09 (0.75,1.56)                      | 1.17 (0.79,1.72)                      | 1.74 (1.07,2.83)                |
| Week 6                                         | 1.00                               | 0.82 (0.58,1.17)                      | 0.84 (0.58,1.22)                      | 0.76 (0.46,1.26)                |
| Week 7                                         | 1.00                               | 1.05 (0.74,1.50)                      | 1.00 (0.69,1.45)                      | 0.81 (0.48,1.37)                |
| Week 8                                         | 1.00                               | 1.15 (0.80,1.65)                      | 1.06 (0.72,1.56)                      | 1.38 (0.85,2.24)                |
| <b>Pulmonary/tricuspid atresia<sup>c</sup></b> |                                    |                                       |                                       |                                 |
| Week 2                                         | 1.00                               | 1.60 (0.83,3.09)                      | 0.99 (0.48,2.00)                      | 1.12 (0.46,2.70)                |
| Week 3                                         | 1.00                               | 0.97 (0.52,1.83)                      | 0.73 (0.37,1.44)                      | 0.83 (0.35,1.95)                |
| Week 4                                         | 1.00                               | 1.09 (0.59,2.02)                      | 0.80 (0.41,1.57)                      | 1.06 (0.45,2.49)                |
| Week 5                                         | 1.00                               | 1.23 (0.64,2.35)                      | 1.20 (0.60,2.39)                      | 1.53 (0.65,3.60)                |

| <b>Exposure and Defect</b>              | <b>&lt;10<sup>th</sup> centile</b> | <b>10-&lt;50<sup>th</sup> centile</b> | <b>50-&lt;90<sup>th</sup> centile</b> | <b>≥90<sup>th</sup> centile</b> |
|-----------------------------------------|------------------------------------|---------------------------------------|---------------------------------------|---------------------------------|
| Week 6                                  | 1.00                               | 0.73 (0.40,1.31)                      | 0.66 (0.35,1.25)                      | 0.95 (0.41,2.18)                |
| Week 7                                  | 1.00                               | 0.95 (0.52,1.73)                      | 1.02 (0.54,1.92)                      | 0.83 (0.34,2.03)                |
| Week 8                                  | 1.00                               | 0.59 (0.34,1.01)                      | 0.45 (0.24,0.83)                      | 0.70 (0.31,1.57)                |
| <b>PVS<sup>c</sup></b>                  |                                    |                                       |                                       |                                 |
| Week 2                                  | 1.00                               | 1.17 (0.78,1.75)                      | 0.89 (0.58,1.37)                      | 0.94 (0.54,1.65)                |
| Week 3                                  | 1.00                               | 0.65 (0.44,0.95)                      | 0.70 (0.47,1.05)                      | 0.60 (0.35,1.05)                |
| Week 4                                  | 1.00                               | 0.90 (0.60,1.35)                      | 1.05 (0.69,1.61)                      | 0.88 (0.50,1.54)                |
| Week 5                                  | 1.00                               | 1.00 (0.66,1.51)                      | 1.12 (0.72,1.72)                      | 1.83 (1.08,3.12)                |
| Week 6                                  | 1.00                               | 0.97 (0.64,1.47)                      | 0.97 (0.63,1.49)                      | 0.82 (0.46,1.46)                |
| Week 7                                  | 1.00                               | 1.12 (0.74,1.69)                      | 1.10 (0.72,1.70)                      | 0.91 (0.50,1.64)                |
| Week 8                                  | 1.00                               | 1.43 (0.91,2.24)                      | 1.37 (0.86,2.19)                      | 1.71 (0.97,3.00)                |
| <b>Septal<sup>b</sup></b>               |                                    |                                       |                                       |                                 |
| Week 2                                  | 1.00                               | 1.02 (0.80,1.31)                      | 0.92 (0.71,1.2)                       | 0.60 (0.40,0.90)                |
| Week 3                                  | 1.00                               | 0.86 (0.68,1.10)                      | 0.78 (0.60,1.02)                      | 0.84 (0.58,1.23)                |
| Week 4                                  | 1.00                               | 1.00 (0.78,1.30)                      | 0.92 (0.70,1.22)                      | 0.95 (0.65,1.39)                |
| Week 5                                  | 1.00                               | 1.12 (0.87,1.45)                      | 0.95 (0.72,1.26)                      | 1.20 (0.82,1.75)                |
| Week 6                                  | 1.00                               | 0.97 (0.76,1.26)                      | 0.89 (0.68,1.18)                      | 0.81 (0.55,1.20)                |
| Week 7                                  | 1.00                               | 1.17 (0.90,1.51)                      | 1.14 (0.86,1.51)                      | 0.98 (0.65,1.47)                |
| Week 8                                  | 1.00                               | 0.88 (0.69,1.13)                      | 0.99 (0.76,1.29)                      | 1.02 (0.71,1.48)                |
| <b>VSD<sub>pm</sub><sup>c</sup></b>     |                                    |                                       |                                       |                                 |
| Week 2                                  | 1.00                               | 0.97 (0.68,1.38)                      | 1.05 (0.72,1.51)                      | 0.60 (0.34,1.04)                |
| Week 3                                  | 1.00                               | 1.06 (0.74,1.51)                      | 0.88 (0.60,1.30)                      | 0.73 (0.43,1.24)                |
| Week 4                                  | 1.00                               | 1.02 (0.70,1.47)                      | 1.06 (0.72,1.56)                      | 1.14 (0.68,1.89)                |
| Week 5                                  | 1.00                               | 1.34 (0.92,1.95)                      | 1.00 (0.67,1.50)                      | 1.34 (0.80,2.23)                |
| Week 6                                  | 1.00                               | 0.88 (0.61,1.26)                      | 0.95 (0.65,1.38)                      | 0.72 (0.42,1.23)                |
| Week 7                                  | 1.00                               | 1.21 (0.83,1.75)                      | 1.13 (0.77,1.68)                      | 0.90 (0.52,1.56)                |
| Week 8                                  | 1.00                               | 0.93 (0.65,1.32)                      | 1.08 (0.74,1.56)                      | 1.25 (0.77,2.04)                |
| <b>ASD<sup>c</sup></b>                  |                                    |                                       |                                       |                                 |
| Week 2                                  | 1.00                               | 1.07 (0.80,1.45)                      | 0.84 (0.60,1.17)                      | 0.66 (0.40,1.11)                |
| Week 3                                  | 1.00                               | 0.74 (0.55,0.98)                      | 0.72 (0.52,0.99)                      | 0.95 (0.60,1.49)                |
| Week 4                                  | 1.00                               | 1.01 (0.75,1.37)                      | 0.83 (0.59,1.16)                      | 0.83 (0.51,1.35)                |
| Week 5                                  | 1.00                               | 0.97 (0.71,1.31)                      | 0.93 (0.67,1.31)                      | 1.13 (0.71,1.82)                |
| Week 6                                  | 1.00                               | 1.05 (0.78,1.43)                      | 0.84 (0.60,1.18)                      | 0.87 (0.53,1.42)                |
| Week 7                                  | 1.00                               | 1.19 (0.87,1.64)                      | 1.19 (0.84,1.68)                      | 1.12 (0.67,1.86)                |
| Week 8                                  | 1.00                               | 0.87 (0.65,1.18)                      | 0.96 (0.69,1.33)                      | 0.87 (0.54,1.40)                |
| <b>SO<sub>2</sub> (ppb)<sup>f</sup></b> |                                    |                                       |                                       |                                 |
| Week 2                                  | <2.73                              | 2.73-<8.89                            | 8.89-<21.7                            | ≥21.7                           |
| Week 3                                  | <2.86                              | 2.86-<8.57                            | 8.57-<21.6                            | ≥21.6                           |
| Week 4                                  | <2.71                              | 2.71-<8.71                            | 8.57-<22.1                            | ≥22.1                           |
| Week 5                                  | <2.71                              | 2.71-<8.71                            | 8.57-<22.1                            | ≥22.1                           |
| Week 6                                  | <2.71                              | 2.71-<8.71                            | 8.71-<21.6                            | ≥21.6                           |
| Week 7                                  | <2.71                              | 2.71-<8.57                            | 8.57-<22.0                            | ≥22.0                           |
| Week 8                                  | <2.71                              | 2.71-<8.71                            | 8.71-<21.9                            | ≥21.9                           |

| Exposure and Defect                       | <10 <sup>th</sup> centile | 10-<50 <sup>th</sup> centile | 50-<90 <sup>th</sup> centile | ≥90 <sup>th</sup> centile |
|-------------------------------------------|---------------------------|------------------------------|------------------------------|---------------------------|
| <b>LVOTO<sup>b</sup></b><br>[OR (95% CI)] |                           |                              |                              |                           |
| Week 2                                    | 1.00                      | 0.79 (0.52,1.20)             | 0.65 (0.41,1.02)             | 0.70 (0.40,1.24)          |
| Week 3                                    | 1.00                      | 1.11 (0.69,1.78)             | 1.42 (0.86,2.36)             | 1.66 (0.91,3.05)          |
| Week 4                                    | 1.00                      | 1.01 (0.63,1.61)             | 1.36 (0.82,2.24)             | 0.71 (0.37,1.35)          |
| Week 5                                    | 1.00                      | 1.02 (0.64,1.63)             | 1.04 (0.63,1.72)             | 1.16 (0.64,2.12)          |
| Week 6                                    | 1.00                      | 1.30 (0.79,2.13)             | 1.03 (0.61,1.74)             | 1.02 (0.54,1.91)          |
| Week 7                                    | 1.00                      | 1.28 (0.78,2.09)             | 1.38 (0.82,2.33)             | 0.94 (0.50,1.80)          |
| Week 8                                    | 1.00                      | 1.57 (0.98,2.53)             | 1.39 (0.84,2.32)             | 1.70 (0.93,3.10)          |
| <b>Aortic stenosis<sup>c</sup></b>        |                           |                              |                              |                           |
| Week 2                                    | 1.00                      | 0.37 (0.19,0.74)             | 0.74 (0.37,1.50)             | 0.68 (0.27,1.73)          |
| Week 3                                    | 1.00                      | 1.49 (0.70,3.18)             | 1.23 (0.55,2.76)             | 1.18 (0.45,3.15)          |
| Week 4                                    | 1.00                      | 0.84 (0.40,1.77)             | 1.43 (0.66,3.10)             | 0.73 (0.27,2.02)          |
| Week 5                                    | 1.00                      | 0.69 (0.34,1.39)             | 0.63 (0.29,1.34)             | 1.11 (0.45,2.72)          |
| Week 6                                    | 1.00                      | 1.43 (0.67,3.07)             | 0.78 (0.35,1.76)             | 1.30 (0.51,3.33)          |
| Week 7                                    | 1.00                      | 1.23 (0.59,2.53)             | 0.98 (0.45,2.14)             | 0.52 (0.18,1.46)          |
| Week 8                                    | 1.00                      | 1.45 (0.67,3.11)             | 1.26 (0.56,2.82)             | 1.83 (0.71,4.71)          |
| <b>COA<sup>c</sup></b>                    |                           |                              |                              |                           |
| Week 2                                    | 1.00                      | 1.03 (0.57,1.85)             | 0.68 (0.37,1.27)             | 0.72 (0.34,1.52)          |
| Week 3                                    | 1.00                      | 0.97 (0.51,1.86)             | 1.74 (0.90,3.39)             | 1.96 (0.90,4.25)          |
| Week 4                                    | 1.00                      | 1.38 (0.71,2.67)             | 1.63 (0.82,3.23)             | 0.93 (0.41,2.14)          |
| Week 5                                    | 1.00                      | 1.06 (0.57,1.97)             | 1.01 (0.53,1.94)             | 1.08 (0.50,2.32)          |
| Week 6                                    | 1.00                      | 1.39 (0.72,2.69)             | 1.05 (0.53,2.08)             | 1.32 (0.60,2.90)          |
| Week 7                                    | 1.00                      | 1.37 (0.69,2.72)             | 1.49 (0.74,3.02)             | 1.30 (0.57,2.93)          |
| Week 8                                    | 1.00                      | 1.08 (0.59,1.97)             | 1.35 (0.72,2.51)             | 1.31 (0.62,2.78)          |
| <b>HLHS<sup>c</sup></b>                   |                           |                              |                              |                           |
| Week 2                                    | 1.00                      | 0.96 (0.53,1.73)             | 0.71 (0.38,1.33)             | 0.95 (0.44,2.07)          |
| Week 3                                    | 1.00                      | 1.05 (0.57,1.95)             | 1.09 (0.57,2.08)             | 1.35 (0.60,3.02)          |
| Week 4                                    | 1.00                      | 0.83 (0.46,1.51)             | 1.14 (0.61,2.15)             | 0.60 (0.25,1.44)          |
| Week 5                                    | 1.00                      | 1.35 (0.68,2.66)             | 1.53 (0.75,3.10)             | 1.29 (0.55,3.04)          |
| Week 6                                    | 1.00                      | 1.24 (0.65,2.37)             | 1.27 (0.65,2.50)             | 0.68 (0.27,1.71)          |
| Week 7                                    | 1.00                      | 1.31 (0.67,2.53)             | 1.53 (0.77,3.04)             | 0.87 (0.36,2.13)          |
| Week 8                                    | 1.00                      | 1.99 (1.01,3.95)             | 1.18 (0.57,2.42)             | 1.74 (0.76,3.98)          |
| <b>Conotruncal<sup>b</sup></b>            |                           |                              |                              |                           |
| Week 2                                    | 1.00                      | 0.83 (0.55,1.25)             | 1.12 (0.72,1.73)             | 1.00 (0.58,1.72)          |
| Week 3                                    | 1.00                      | 0.89 (0.58,1.35)             | 0.99 (0.63,1.55)             | 1.10 (0.64,1.89)          |
| Week 4                                    | 1.00                      | 1.33 (0.86,2.05)             | 1.06 (0.66,1.69)             | 0.97 (0.55,1.72)          |
| Week 5                                    | 1.00                      | 0.80 (0.54,1.20)             | 0.77 (0.49,1.19)             | 0.77 (0.45,1.31)          |
| Week 6                                    | 1.00                      | 1.03 (0.66,1.59)             | 1.17 (0.73,1.88)             | 1.15 (0.65,2.02)          |
| Week 7                                    | 1.00                      | 1.09 (0.71,1.67)             | 1.18 (0.74,1.88)             | 0.94 (0.53,1.67)          |
| Week 8                                    | 1.00                      | 1.23 (0.81,1.86)             | 1.24 (0.79,1.94)             | 1.14 (0.66,1.96)          |
| <b>d-TGA<sup>c</sup></b>                  |                           |                              |                              |                           |
| Week 2                                    | 1.00                      | 0.81 (0.44,1.47)             | 1.25 (0.67,2.32)             | 0.86 (0.40,1.86)          |
| Week 3                                    | 1.00                      | 1.21 (0.67,2.22)             | 0.94 (0.50,1.79)             | 0.96 (0.45,2.06)          |

| <b>Exposure and Defect</b>        | <b>&lt;10<sup>th</sup> centile</b> | <b>10-&lt;50<sup>th</sup> centile</b> | <b>50-&lt;90<sup>th</sup> centile</b> | <b>≥90<sup>th</sup> centile</b> |
|-----------------------------------|------------------------------------|---------------------------------------|---------------------------------------|---------------------------------|
| Week 4                            | 1.00                               | 0.90 (0.49,1.66)                      | 1.09 (0.57,2.07)                      | 1.16 (0.54,2.50)                |
| Week 5                            | 1.00                               | 0.86 (0.48,1.54)                      | 0.74 (0.40,1.39)                      | 0.95 (0.45,1.98)                |
| Week 6                            | 1.00                               | 1.00 (0.54,1.87)                      | 1.08 (0.56,2.07)                      | 1.31 (0.61,2.81)                |
| Week 7                            | 1.00                               | 0.93 (0.50,1.71)                      | 1.19 (0.63,2.27)                      | 0.98 (0.45,2.12)                |
| Week 8                            | 1.00                               | 1.13 (0.63,2.03)                      | 1.15 (0.62,2.13)                      | 0.86 (0.40,1.86)                |
| TOF <sup>c</sup>                  |                                    |                                       |                                       |                                 |
| Week 2                            | 1.00                               | 0.84 (0.51,1.39)                      | 0.95 (0.56,1.62)                      | 0.99 (0.51,1.91)                |
| Week 3                            | 1.00                               | 0.76 (0.46,1.26)                      | 1.06 (0.63,1.81)                      | 1.14 (0.59,2.20)                |
| Week 4                            | 1.00                               | 1.43 (0.84,2.44)                      | 0.91 (0.51,1.61)                      | 0.94 (0.47,1.87)                |
| Week 5                            | 1.00                               | 0.93 (0.56,1.53)                      | 0.86 (0.50,1.48)                      | 0.76 (0.39,1.49)                |
| Week 6                            | 1.00                               | 1.00 (0.59,1.71)                      | 1.15 (0.66,2.03)                      | 0.91 (0.45,1.84)                |
| Week 7                            | 1.00                               | 1.35 (0.78,2.33)                      | 1.40 (0.78,2.51)                      | 1.13 (0.56,2.31)                |
| Week 8                            | 1.00                               | 1.17 (0.71,1.95)                      | 1.15 (0.67,1.98)                      | 1.29 (0.67,2.50)                |
| Other conotruncals <sup>c,d</sup> |                                    |                                       |                                       |                                 |
| Week 2                            | 1.00                               | 0.56 (0.26,1.21)                      | 1.00 (0.46,2.14)                      | 0.96 (0.38,2.44)                |
| Week 3                            | 1.00                               | 0.99 (0.45,2.19)                      | 1.16 (0.52,2.61)                      | 1.74 (0.68,4.42)                |
| Week 4                            | 1.00                               | 1.82 (0.80,4.14)                      | 1.40 (0.60,3.29)                      | 0.53 (0.16,1.69)                |
| Week 5                            | 1.00                               | 0.62 (0.29,1.29)                      | 0.91 (0.42,1.94)                      | 0.87 (0.34,2.27)                |
| Week 6                            | 1.00                               | 1.05 (0.47,2.32)                      | 1.19 (0.53,2.68)                      | 1.30 (0.50,3.42)                |
| Week 7                            | 1.00                               | 0.89 (0.43,1.86)                      | 0.78 (0.36,1.68)                      | 0.55 (0.20,1.54)                |
| Week 8                            | 1.00                               | 1.49 (0.66,3.35)                      | 1.54 (0.67,3.51)                      | 1.15 (0.42,3.15)                |
| APVR <sup>b</sup>                 |                                    |                                       |                                       |                                 |
| Week 2                            | 1.00                               | 0.87 (0.42,1.83)                      | 0.81 (0.38,1.77)                      | 0.66 (0.24,1.82)                |
| Week 3                            | 1.00                               | 1.35 (0.60,3.02)                      | 1.34 (0.58,3.10)                      | 1.08 (0.38,3.04)                |
| Week 4                            | 1.00                               | 1.40 (0.59,3.29)                      | 1.52 (0.64,3.63)                      | 1.05 (0.36,3.04)                |
| Week 5                            | 1.00                               | 1.25 (0.55,2.83)                      | 1.66 (0.72,3.83)                      | 0.76 (0.25,2.36)                |
| Week 6                            | 1.00                               | 1.28 (0.55,3.01)                      | 1.06 (0.45,2.54)                      | 2.34 (0.89,6.17)                |
| Week 7                            | 1.00                               | 1.29 (0.58,2.89)                      | 0.90 (0.39,2.10)                      | 1.38 (0.52,3.64)                |
| Week 8                            | 1.00                               | 1.96 (0.79,4.85)                      | 2.16 (0.87,5.37)                      | 1.39 (0.47,4.10)                |
| TAPVR <sup>c</sup>                |                                    |                                       |                                       |                                 |
| Week 2                            | 1.00                               | 0.89 (0.42,1.90)                      | 0.87 (0.40,1.91)                      | 0.76 (0.28,2.07)                |
| Week 3                            | 1.00                               | 1.34 (0.60,2.99)                      | 1.34 (0.59,3.05)                      | 0.99 (0.35,2.84)                |
| Week 4                            | 1.00                               | 1.32 (0.57,3.06)                      | 1.39 (0.59,3.28)                      | 1.06 (0.38,3.00)                |
| Week 5                            | 1.00                               | 1.25 (0.54,2.93)                      | 1.74 (0.74,4.11)                      | 0.86 (0.28,2.61)                |
| Week 6                            | 1.00                               | 1.19 (0.51,2.75)                      | 1.10 (0.47,2.58)                      | 1.95 (0.74,5.11)                |
| Week 7                            | 1.00                               | 1.39 (0.60,3.21)                      | 0.99 (0.42,2.34)                      | 1.37 (0.51,3.66)                |
| Week 8                            | 1.00                               | 1.72 (0.71,4.20)                      | 1.88 (0.77,4.57)                      | 1.38 (0.48,3.97)                |
| RVOTO <sup>b</sup>                |                                    |                                       |                                       |                                 |
| Week 2                            | 1.00                               | 0.81 (0.53,1.25)                      | 0.78 (0.49,1.24)                      | 1.05 (0.59,1.87)                |
| Week 3                            | 1.00                               | 1.31 (0.82,2.10)                      | 1.07 (0.65,1.77)                      | 0.96 (0.51,1.79)                |
| Week 4                            | 1.00                               | 0.98 (0.62,1.55)                      | 0.87 (0.53,1.43)                      | 0.95 (0.52,1.76)                |
| Week 5                            | 1.00                               | 1.19 (0.73,1.94)                      | 1.45 (0.86,2.44)                      | 1.34 (0.71,2.51)                |
| Week 6                            | 1.00                               | 1.16 (0.71,1.89)                      | 1.06 (0.63,1.78)                      | 1.09 (0.58,2.06)                |
| Week 7                            | 1.00                               | 1.27 (0.78,2.07)                      | 1.31 (0.78,2.21)                      | 0.81 (0.42,1.56)                |

| <b>Exposure and Defect</b>                     | <b>&lt;10<sup>th</sup> centile</b> | <b>10-&lt;50<sup>th</sup> centile</b> | <b>50-&lt;90<sup>th</sup> centile</b> | <b>≥90<sup>th</sup> centile</b> |
|------------------------------------------------|------------------------------------|---------------------------------------|---------------------------------------|---------------------------------|
| Week 8                                         | 1.00                               | 1.29 (0.81,2.04)                      | 1.40 (0.86,2.30)                      | 1.31 (0.71,2.41)                |
| <b>Pulmonary/tricuspid atresia<sup>c</sup></b> |                                    |                                       |                                       |                                 |
| Week 2                                         | 1.00                               | 0.79 (0.37,1.67)                      | 1.32 (0.61,2.87)                      | 0.59 (0.20,1.74)                |
| Week 3                                         | 1.00                               | 1.61 (0.66,3.91)                      | 1.60 (0.65,3.91)                      | 1.48 (0.53,4.17)                |
| Week 4                                         | 1.00                               | 1.59 (0.72,3.52)                      | 0.87 (0.38,2.02)                      | 0.96 (0.35,2.62)                |
| Week 5                                         | 1.00                               | 0.77 (0.37,1.59)                      | 0.80 (0.37,1.73)                      | 1.23 (0.49,3.12)                |
| Week 6                                         | 1.00                               | 1.21 (0.55,2.67)                      | 1.00 (0.44,2.27)                      | 1.12 (0.42,3.02)                |
| Week 7                                         | 1.00                               | 0.83 (0.40,1.71)                      | 1.02 (0.47,2.20)                      | 0.52 (0.18,1.55)                |
| Week 8                                         | 1.00                               | 0.84 (0.42,1.66)                      | 0.74 (0.35,1.56)                      | 0.93 (0.36,2.38)                |
| <b>PVS<sup>c</sup></b>                         |                                    |                                       |                                       |                                 |
| Week 2                                         | 1.00                               | 0.85 (0.53,1.36)                      | 0.70 (0.42,1.16)                      | 1.08 (0.58,2.01)                |
| Week 3                                         | 1.00                               | 1.14 (0.7,1.87)                       | 0.88 (0.52,1.49)                      | 0.81 (0.42,1.57)                |
| Week 4                                         | 1.00                               | 0.92 (0.56,1.51)                      | 0.88 (0.52,1.51)                      | 0.97 (0.50,1.87)                |
| Week 5                                         | 1.00                               | 1.33 (0.76,2.31)                      | 1.71 (0.95,3.06)                      | 1.39 (0.69,2.81)                |
| Week 6                                         | 1.00                               | 1.14 (0.67,1.95)                      | 1.07 (0.61,1.88)                      | 1.09 (0.55,2.17)                |
| Week 7                                         | 1.00                               | 1.53 (0.87,2.69)                      | 1.61 (0.89,2.91)                      | 0.96 (0.46,2.00)                |
| Week 8                                         | 1.00                               | 1.49 (0.87,2.53)                      | 1.68 (0.96,2.95)                      | 1.42 (0.71,2.81)                |
| <b>Septal<sup>b</sup></b>                      |                                    |                                       |                                       |                                 |
| Week 2                                         | 1.00                               | 0.75 (0.55,1.01)                      | 0.63 (0.45,0.88)                      | 0.79 (0.52,1.20)                |
| Week 3                                         | 1.00                               | 0.90 (0.66,1.23)                      | 1.05 (0.74,1.49)                      | 1.24 (0.80,1.91)                |
| Week 4                                         | 1.00                               | 1.19 (0.86,1.64)                      | 1.03 (0.71,1.48)                      | 0.87 (0.55,1.38)                |
| Week 5                                         | 1.00                               | 1.20 (0.86,1.68)                      | 1.30 (0.90,1.88)                      | 1.34 (0.86,2.10)                |
| Week 6                                         | 1.00                               | 0.97 (0.70,1.34)                      | 1.11 (0.77,1.59)                      | 1.12 (0.71,1.75)                |
| Week 7                                         | 1.00                               | 1.10 (0.8,1.52)                       | 1.01 (0.70,1.46)                      | 0.89 (0.56,1.40)                |
| Week 8                                         | 1.00                               | 0.99 (0.72,1.34)                      | 1.07 (0.76,1.51)                      | 1.09 (0.71,1.68)                |
| <b>VSD<sub>pm</sub><sup>c</sup></b>            |                                    |                                       |                                       |                                 |
| Week 2                                         | 1.00                               | 0.76 (0.50,1.15)                      | 0.65 (0.41,1.02)                      | 1.08 (0.63,1.85)                |
| Week 3                                         | 1.00                               | 1.32 (0.82,2.11)                      | 1.50 (0.91,2.48)                      | 1.98 (1.10,3.56)                |
| Week 4                                         | 1.00                               | 1.36 (0.86,2.15)                      | 0.94 (0.57,1.55)                      | 0.77 (0.42,1.42)                |
| Week 5                                         | 1.00                               | 0.97 (0.61,1.53)                      | 1.23 (0.75,2.02)                      | 1.13 (0.62,2.04)                |
| Week 6                                         | 1.00                               | 0.95 (0.60,1.51)                      | 1.13 (0.69,1.85)                      | 1.02 (0.56,1.86)                |
| Week 7                                         | 1.00                               | 1.22 (0.77,1.93)                      | 1.03 (0.62,1.69)                      | 0.98 (0.54,1.78)                |
| Week 8                                         | 1.00                               | 0.82 (0.54,1.25)                      | 1.00 (0.63,1.57)                      | 0.93 (0.53,1.63)                |
| <b>ASD<sup>c</sup></b>                         |                                    |                                       |                                       |                                 |
| Week 2                                         | 1.00                               | 0.70 (0.48,1.00)                      | 0.63 (0.41,0.95)                      | 0.64 (0.37,1.12)                |
| Week 3                                         | 1.00                               | 0.75 (0.52,1.10)                      | 0.84 (0.55,1.28)                      | 0.79 (0.44,1.39)                |
| Week 4                                         | 1.00                               | 1.01 (0.68,1.49)                      | 1.11 (0.71,1.73)                      | 0.90 (0.49,1.63)                |
| Week 5                                         | 1.00                               | 1.37 (0.92,2.05)                      | 1.23 (0.78,1.95)                      | 1.37 (0.77,2.44)                |
| Week 6                                         | 1.00                               | 0.95 (0.64,1.40)                      | 1.10 (0.71,1.71)                      | 1.07 (0.60,1.92)                |
| Week 7                                         | 1.00                               | 1.04 (0.70,1.53)                      | 1.05 (0.67,1.64)                      | 0.79 (0.43,1.43)                |
| Week 8                                         | 1.00                               | 1.13 (0.78,1.66)                      | 1.03 (0.67,1.59)                      | 1.10 (0.62,1.93)                |

Abbreviations: APVR-anomalous pulmonary venous return; ASD-atrial septal defect; AVSD-atrioventricular septal defect; CO-carbon monoxide; COA-coarctation of the aorta; d-TGA-d-transposition of the great arteries; HLHS-hypoplastic left heart syndrome; LVOTO-left ventricular outflow tract obstructions; NO<sub>2</sub>-nitrogen dioxide; O<sub>3</sub>-ozone; PM<sub>10</sub>-particulate matter less than 10 microns in diameter; PM<sub>2.5</sub>-particulate matter less than 2.5 microns in diameter; PVS-pulmonary valve stenosis; RVOTO-right ventricular outflow tract obstructions; SO<sub>2</sub>-sulfur dioxide; TAPVR-total anomalous pulmonary venous return; TOF-tetralogy of Fallot; VSD<sub>pm</sub>-perimembranous ventricular septal defects.

<sup>a</sup>All results for the National Birth Defects Prevention Study population from 1997-2006, except for PM<sub>2.5</sub> which was 1999-2006 due to unavailability of monitoring data for PM<sub>2.5</sub> prior to 1999.

<sup>b</sup>Estimates from a hierarchical regression model. First stage was polytomous logistic model with defect groupings and adjusted for maternal race, age, educational attainment, household income, maternal smoking status and alcohol consumption during early pregnancy, nativity, and site-specific heart defect ratio. Second stage was a linear model with indicator variables for defect grouping and level of exposure. Defect-groupings include all individual defects listed underneath with the following additions: LVOTO also includes IAA-Type A, APVR also includes partial APVR and RVOTO includes Ebstein's Anomaly. Those defects could not be analyzed individually due to limited sample size. <sup>c</sup>Estimates result from a hierarchical regression model, same as above but used individual defects as outcomes in first-stage model and included indicator variable for individual defect in second-stage model. <sup>d</sup>Other conotruncal includes common truncus, interrupted aortic-arch, type B and type not specified, double outlet right ventricle defects, and conoventricular septal defects. <sup>e</sup>For ozone, the three categories of exposure were 25<sup>th</sup> to less than the 50<sup>th</sup> centile, 50<sup>th</sup> centile to less than the 75<sup>th</sup> centile, at or greater than the 75<sup>th</sup> centile, with the referent grouping being below the 25<sup>th</sup> centile. <sup>f</sup>Due to small sample size and instable estimation, AVSD was removed from hierarchical analysis of SO<sub>2</sub> exposure.

**Table S5:** Adjusted odds ratios and 95% confidence intervals between congenital heart defects and pollutant factors<sup>a</sup> identified through principal components analysis, National Birth Defects Prevention Study, 1999-2006.

| Defect                                   | Factor 1:<br><10 <sup>th</sup> centile | Factor 1:<br>10 <sup>th</sup> -<50 <sup>th</sup> centile | Factor 1:<br>50 <sup>th</sup> -<90 <sup>th</sup> centile | Factor 1:<br>≥90 <sup>th</sup> centile | Factor 2:<br><10 <sup>th</sup> centile | Factor 2:<br>10 <sup>th</sup> -<50 <sup>th</sup> centile | Factor 2:<br>50 <sup>th</sup> -<90 <sup>th</sup> centile | Factor 2:<br>≥90 <sup>th</sup> centile | Factor 3:<br><10 <sup>th</sup> centile | Factor 3:<br>10 <sup>th</sup> -<50 <sup>th</sup> centile | Factor 3:<br>50 <sup>th</sup> -<90 <sup>th</sup> centile | Factor 3:<br>≥90 <sup>th</sup> centile |
|------------------------------------------|----------------------------------------|----------------------------------------------------------|----------------------------------------------------------|----------------------------------------|----------------------------------------|----------------------------------------------------------|----------------------------------------------------------|----------------------------------------|----------------------------------------|----------------------------------------------------------|----------------------------------------------------------|----------------------------------------|
| <b>LVOTO<sup>b</sup></b>                 | 1.00                                   | 1.57 (0.93,2.63)                                         | 1.62 (0.96,2.74)                                         | 1.04 (0.51,2.10)                       | 1.00                                   | 1.42 (0.86,2.36)                                         | 1.26 (0.75,2.12)                                         | 1.33 (0.69,2.53)                       | 1.00                                   | 1.02 (0.58,1.77)                                         | 1.01 (0.58,1.77)                                         | 0.86 (0.44,1.70)                       |
| Aortic stenosis <sup>c</sup>             | 1.00                                   | 2.31 (0.76,6.98)                                         | 2.34 (0.76,7.15)                                         | 1.88 (0.31,11.2)                       | 1.00                                   | 2.15 (0.72,6.45)                                         | 1.89 (0.62,5.72)                                         | 1.93 (0.50,7.36)                       | 1.00                                   | 1.58 (0.56,4.52)                                         | 1.00 (0.35,2.90)                                         | 0.69 (0.16,3.10)                       |
| COA <sup>c</sup>                         | 1.00                                   | 1.25 (0.61,2.57)                                         | 1.47 (0.71,3.03)                                         | 1.22 (0.49,3.02)                       | 1.00                                   | 0.99 (0.52,1.87)                                         | 0.82 (0.42,1.59)                                         | 1.37 (0.62,3.00)                       | 1.00                                   | 0.81 (0.38,1.73)                                         | 1.28 (0.61,2.67)                                         | 0.67 (0.26,1.72)                       |
| HLHS <sup>c</sup>                        | 1.00                                   | 1.59 (0.77,3.28)                                         | 1.58 (0.75,3.30)                                         | 1.21 (0.46,3.22)                       | 1.00                                   | 2.04 (0.88,4.73)                                         | 1.94 (0.82,4.56)                                         | 1.26 (0.44,3.63)                       | 1.00                                   | 1.10 (0.50,2.43)                                         | 0.88 (0.40,1.96)                                         | 1.15 (0.46,2.86)                       |
| <b>Conotruncal<sup>b</sup></b>           | 1.00                                   | 1.18 (0.75,1.84)                                         | 1.35 (0.86,2.12)                                         | 1.24 (0.71,2.17)                       | 1.00                                   | 1.11 (0.72,1.69)                                         | 1.15 (0.74,1.77)                                         | 1.19 (0.69,2.04)                       | 1.00                                   | 0.79 (0.48,1.28)                                         | 1.05 (0.64,1.70)                                         | 0.80 (0.44,1.44)                       |
| d-TGA <sup>c</sup>                       | 1.00                                   | 1.09 (0.57,2.10)                                         | 1.17 (0.60,2.27)                                         | 1.17 (0.52,2.66)                       | 1.00                                   | 1.04 (0.55,1.96)                                         | 1.03 (0.54,1.99)                                         | 1.29 (0.58,2.86)                       | 1.00                                   | 0.68 (0.32,1.44)                                         | 1.15 (0.55,2.39)                                         | 1.05 (0.45,2.43)                       |
| TOF <sup>c</sup>                         | 1.00                                   | 1.33 (0.74,2.40)                                         | 1.64 (0.91,2.97)                                         | 1.27 (0.60,2.69)                       | 1.00                                   | 1.15 (0.66,2.00)                                         | 1.33 (0.76,2.33)                                         | 1.27 (0.63,2.55)                       | 1.00                                   | 0.85 (0.45,1.61)                                         | 1.01 (0.54,1.89)                                         | 0.72 (0.34,1.56)                       |
| Other conotruncals <sup>c,d</sup>        | 1.00                                   | 1.08 (0.44,2.63)                                         | 1.08 (0.43,2.69)                                         | 1.23 (0.41,3.65)                       | 1.00                                   | 1.23 (0.50,3.02)                                         | 0.96 (0.38,2.44)                                         | 0.99 (0.32,3.06)                       | 1.00                                   | 0.78 (0.31,1.94)                                         | 0.97 (0.39,2.39)                                         | 0.48 (0.14,1.70)                       |
| <b>APVR<sup>b</sup></b>                  | 1.00                                   | 0.52 (0.23,1.20)                                         | 0.66 (0.29,1.50)                                         | 0.83 (0.30,2.30)                       | 1.00                                   | 0.84 (0.37,1.91)                                         | 0.72 (0.30,1.69)                                         | 0.59 (0.19,1.85)                       | 1.00                                   | 0.58 (0.23,1.49)                                         | 0.92 (0.37,2.30)                                         | 0.47 (0.14,1.53)                       |
| <b>AVSD<sup>c</sup></b>                  | 1.00                                   | 0.40 (0.13,1.36)                                         | 0.87 (0.28,2.68)                                         | 0.51 (0.10, 2.70)                      | 1.00                                   | 1.32 (0.38,4.59)                                         | 0.67 (0.17,2.62)                                         | 1.20 (0.25, 5.91)                      | 1.00                                   | 2.84 (0.28, 28.9)                                        | 2.18 (0.21,22.7)                                         | 2.59 (0.21,32.7)                       |
| <b>RVOTO<sup>b</sup></b>                 | 1.00                                   | 1.13 (0.68,1.86)                                         | 1.27 (0.77,2.11)                                         | 1.40 (0.75,2.62)                       | 1.00                                   | 1.32 (0.78,2.24)                                         | 1.24 (0.72,2.14)                                         | 1.85 (0.99,3.46)                       | 1.00                                   | 1.35 (0.74,2.45)                                         | 1.10 (0.60,2.02)                                         | 1.18 (0.58,2.38)                       |
| Pulmonary/tricuspid atresia <sup>c</sup> | 1.00                                   | 1.37 (0.59,3.21)                                         | 0.85 (0.34,2.14)                                         | 1.26 (0.43,3.68)                       | 1.00                                   | 1.49 (0.57,3.87)                                         | 0.99 (0.36,2.73)                                         | 1.70 (0.56,5.13)                       | 1.00                                   | 0.97 (0.36,2.63)                                         | 1.05 (0.39,2.82)                                         | 0.87 (0.27,2.81)                       |
| PVS <sup>c</sup>                         | 1.00                                   | 1.06 (0.60,1.85)                                         | 1.41 (0.80,2.48)                                         | 1.41 (0.69,2.89)                       | 1.00                                   | 1.20 (0.66,2.18)                                         | 1.28 (0.70,2.34)                                         | 1.89 (0.94,3.79)                       | 1.00                                   | 1.51 (0.76,3.00)                                         | 1.08 (0.54,2.18)                                         | 1.03 (0.46,2.31)                       |
| <b>Septal<sup>b</sup></b>                | 1.00                                   | 1.03 (0.69,1.52)                                         | 1.20 (0.81,1.78)                                         | 1.12 (0.69,1.81)                       | 1.00                                   | 1.06 (0.74,1.52)                                         | 0.89 (0.61,1.30)                                         | 0.73 (0.44,1.19)                       | 1.00                                   | 0.69 (0.47,1.03)                                         | 0.64 (0.43,0.97)                                         | 0.54 (0.32,0.90)                       |
| VSD <sub>pm</sub> <sup>c</sup>           | 1.00                                   | 0.80 (0.50,1.27)                                         | 0.97 (0.60,1.56)                                         | 0.95 (0.53,1.71)                       | 1.00                                   | 1.47 (0.89,2.43)                                         | 1.09 (0.65,1.84)                                         | 0.95 (0.50,1.83)                       | 1.00                                   | 0.65 (0.40,1.07)                                         | 0.59 (0.36,0.98)                                         | 0.67 (0.37,1.23)                       |
| ASD <sup>c</sup>                         | 1.00                                   | 1.36 (0.77,2.39)                                         | 1.49 (0.84,2.64)                                         | 1.32 (0.67,2.62)                       | 1.00                                   | 0.80(0.51,1.27)                                          | 0.78 (0.49,1.25)                                         | 0.62 (0.32,1.17)                       | 1.00                                   | 0.76 (0.45,1.29)                                         | 0.70 (0.41,1.19)                                         | 0.40 (0.19,0.83)                       |

Abbreviations: APVR-anomalous pulmonary venous return; ASD-atrial septal defect; AVSD-atrioventricular septal defect; CO-carbon monoxide; COA-coarctation of the aorta; d-TGA-d-transposition of the great arteries; HLHS-hypoplastic left heart syndrome; LVOTO-left ventricular outflow tract obstructions; NO<sub>2</sub>-nitrogen dioxide; O<sub>3</sub>-ozone; PM<sub>10</sub>-particulate matter less than 10 microns in diameter; PM<sub>2.5</sub>-particulate matter less than 2.5 microns in diameter; PVS-pulmonary valve stenosis; RVOTO-right ventricular outflow tract obstructions; SO<sub>2</sub>-sulfur dioxide; TOF-tetralogy of Fallot; VSD<sub>pm</sub>-perimembranous ventricular septal defects.

<sup>a</sup>Pollutant factors created using loadings resulting from the principal components analysis. Loadings are the relative weight of each of the original pollutant variables used to obtain the value of the computed factor. The loadings for each factor are: Factor 1: CO 85, NO<sub>2</sub> 71, O<sub>3</sub> -39, PM<sub>10</sub> 40, PM<sub>2.5</sub> 21, SO<sub>2</sub> 5; Factor 2: CO 11, NO<sub>2</sub> 6, O<sub>3</sub> 66, PM<sub>10</sub> 68, PM<sub>2.5</sub> 71, SO<sub>2</sub> -3; Factor 3: CO -11, NO<sub>2</sub> 25, O<sub>3</sub> -20, PM<sub>10</sub> -18, PM<sub>2.5</sub> 32, SO<sub>2</sub> 94. <sup>b</sup>Estimates results from a hierarchical regression model with first stage polytomous logistic model of defect groupings adjusted for maternal race, maternal age, maternal educational attainment, maternal household income, maternal smoking status and alcohol consumption during early pregnancy, nativity, and site-specific heart defect ratio. Defect-groupings include all individual defects listed underneath with the following additions: LVOTO also includes IAA-Type A, APVR includes total and partial APVR, and RVOTO includes Ebstein's Anomaly. Those defects could not be analyzed individually due to limited sample size. Septal grouping does not include muscular ventricular septal defects (VSD<sub>muscular</sub>) as they were only collected in the first year of study when there was no available PM<sub>2.5</sub> data. <sup>c</sup>Estimates result from a hierarchical regression model with first stage polytomous logistic model of individual defects and adjusted for maternal race, maternal age, maternal educational attainment, maternal household income, maternal smoking status and alcohol consumption during early pregnancy, nativity, and site-specific heart defect ratio. <sup>d</sup>Other Conotruncal category includes common truncus, interrupted aortic-arch, type B and type not specified, double outlet right ventricle defects, and conoventricular septal defects. <sup>e</sup>Estimates result from model utilizing Firth's penalized maximum likelihood regression to deal with quasi-separation of points due to small sample size in certain cells. Model adjusted for maternal race, maternal age, maternal educational attainment, maternal household income, maternal smoking status and alcohol consumption during early pregnancy, nativity, and site-specific heart defect ratio. Excluded from the hierarchical analysis.

**Table S6:** Adjusted<sup>a</sup> odds ratios and 95% confidence intervals between congenital heart defects and 7-week average exposure to criteria air pollutants among participants who lived within 10 km of a stationary air monitor, National Birth Defects Prevention Study, 1997-2006.<sup>b</sup>

| <b>Defect-Grouping</b>           | <b>&lt;10<sup>th</sup> centile</b> | <b>10<sup>th</sup> -&lt;50<sup>th</sup> centile</b> | <b>50<sup>th</sup> -&lt;90<sup>th</sup> centile</b> | <b>≥90<sup>th</sup> centile</b> |
|----------------------------------|------------------------------------|-----------------------------------------------------|-----------------------------------------------------|---------------------------------|
| <b>CO</b>                        |                                    |                                                     |                                                     |                                 |
| LVOTO                            | 1.00                               | 1.38 (0.78,2.45)                                    | 1.39 (0.78,2.47)                                    | 1.25 (0.62,2.53)                |
| Conotruncal                      | 1.00                               | 1.19 (0.74,1.94)                                    | 1.13 (0.69,1.85)                                    | 1.43 (0.80,2.57)                |
| APVR                             | 1.00                               | 0.51 (0.18,1.42)                                    | 0.56 (0.20,1.57)                                    | 0.59 (0.16,2.18)                |
| RVOTO                            | 1.00                               | 0.99 (0.57,1.74)                                    | 0.89 (0.50,1.57)                                    | 0.70 (0.33,1.47)                |
| Septal                           | 1.00                               | 0.89 (0.59,1.36)                                    | 1.03 (0.68,1.56)                                    | 1.10 (0.66,1.82)                |
| <b>NO<sub>2</sub></b>            |                                    |                                                     |                                                     |                                 |
| LVOTO                            | 1.00                               | 1.25 (0.54,2.88)                                    | 1.37 (0.60,3.13)                                    | 1.44 (0.58,3.61)                |
| Conotruncal                      | 1.00                               | 1.00 (0.49,2.04)                                    | 1.20 (0.59,2.43)                                    | 1.10 (0.49,2.48)                |
| APVR                             | 1.00                               | 0.22 (0.07,0.69)                                    | 0.27 (0.09,0.81)                                    | 0.56 (0.16,1.99)                |
| RVOTO                            | 1.00                               | 1.50 (0.52,4.34)                                    | 1.39 (0.48,4.00)                                    | 2.33 (0.75,7.22)                |
| Septal                           | 1.00                               | 1.01 (0.55,1.86)                                    | 0.91 (0.50,1.67)                                    | 1.12 (0.56,2.24)                |
| <b>O<sub>3</sub><sup>c</sup></b> |                                    |                                                     |                                                     |                                 |
| LVOTO                            | 1.00                               | 1.47 (0.81,2.67)                                    | 1.41 (0.78,2.56)                                    | 1.62 (0.84,3.13)                |
| Conotruncal                      | 1.00                               | 1.18 (0.76,1.84)                                    | 1.04 (0.67,1.63)                                    | 0.88 (0.51,1.52)                |
| APVR                             | 1.00                               | 0.65 (0.21,2.02)                                    | 1.20 (0.43,3.39)                                    | 1.13 (0.33,3.84)                |
| RVOTO                            | 1.00                               | 1.61 (0.81,3.21)                                    | 2.00 (1.02,3.91)                                    | 1.52 (0.70,3.31)                |
| Septal                           | 1.00                               | 1.35 (0.87,2.09)                                    | 1.25 (0.81,1.95)                                    | 1.07 (0.63,1.85)                |
| <b>PM<sub>10</sub></b>           |                                    |                                                     |                                                     |                                 |
| LVOTO                            | 1.00                               | 0.87 (0.48,1.57)                                    | 1.13 (0.63,2.03)                                    | 1.02 (0.51,2.03)                |
| Conotruncal                      | 1.00                               | 0.95 (0.54,1.66)                                    | 1.09 (0.63,1.89)                                    | 1.05 (0.56,1.97)                |
| APVR                             | 1.00                               | 1.37 (0.31,6.08)                                    | 1.26 (0.28,5.57)                                    | 1.20 (0.23,6.31)                |
| RVOTO                            | 1.00                               | 1.12 (0.72,1.76)                                    | 1.01 (0.65,1.58)                                    | 0.89 (0.52,1.53)                |
| Septal                           | 1.00                               | 1.26 (0.28,5.57)                                    | 1.20 (0.23,6.31)                                    | 1.20 (0.23,6.15)                |
| <b>PM<sub>2.5</sub></b>          |                                    |                                                     |                                                     |                                 |
| LVOTO                            | 1.00                               | 1.18 (0.78,1.78)                                    | 1.10 (0.71,1.68)                                    | 1.57 (0.93,2.66)                |
| Conotruncal                      | 1.00                               | 0.95 (0.65,1.40)                                    | 0.96 (0.65,1.43)                                    | 1.43 (0.88,2.30)                |
| APVR                             | 1.00                               | 0.95 (0.41,2.19)                                    | 0.87 (0.36,2.09)                                    | 1.55 (0.54,4.46)                |
| RVOTO                            | 1.00                               | 1.17 (0.72,1.88)                                    | 1.35 (0.84,2.18)                                    | 1.21 (0.65,2.28)                |
| Septal                           | 1.00                               | 0.91 (0.68,1.22)                                    | 0.67 (0.49,0.91)                                    | 0.71 (0.45,1.10)                |
| <b>SO<sub>2</sub></b>            |                                    |                                                     |                                                     |                                 |
| LVOTO                            | 1.00                               | 1.18 (0.58,2.40)                                    | 1.29 (0.63,2.65)                                    | 0.74 (0.30,1.83)                |
| Conotruncal                      | 1.00                               | 0.75 (0.40,1.42)                                    | 0.75 (0.40,1.42)                                    | 0.61 (0.29,1.31)                |
| APVR                             | 1.00                               | 1.95 (0.21,18.0)                                    | 4.01 (0.45,35.5)                                    | 1.00 (0.05,18.3)                |
| RVOTO                            | 1.00                               | 1.46 (0.70,3.04)                                    | 0.93 (0.43,1.99)                                    | 0.69 (0.27,1.74)                |
| Septal                           | 1.00                               | 1.75 (1.07,2.85)                                    | 1.34 (0.80,2.25)                                    | 1.52 (0.83,2.76)                |

Abbreviations: APVR-anomalous pulmonary venous return; ASD-atrial septal defect; COA-coarctation of the aorta; d-TGA-d-transposition of the great arteries; HLHS-hypoplastic left heart syndrome; LVOTO-left ventricular outflow tract obstructions; PM<sub>10</sub>-particulate matter less than 10 microns in diameter; PM<sub>2.5</sub>-particulate matter less than 2.5 microns in diameter; PVS-pulmonary valve stenosis; RVOTO-right ventricular outflow tract obstructions; TOF-tetralogy of Fallot; VSD<sub>muscular</sub>-muscular ventricular septal defects; VSD<sub>pm</sub>-perimembranous ventricular septal defects.

<sup>a</sup>Estimates result from first stage maximum-likelihood, polytomous logistic model with defect groupings as outcomes and adjusted for maternal race, maternal age, maternal educational attainment, maternal household income, maternal smoking status and alcohol consumption during early pregnancy, nativity, and site-specific heart defect ratio. Same pollutant-cutoffs to create categories of exposure as primary 7-week analysis were used. Defect-groupings include: LVOTO- Aortic Stenosis, COA, HLHS, interrupted aortic arch-type A; Conotruncals-dTGA, TOF, common truncus, interrupted aortic arch-type B and type not specified, double outlet right ventricle defects, and conoventricular septal defects; APVR- total and partial APVR; RVOTO-pulmonary atresia, tricuspid atresia, PVS, and Ebstein's anomaly; Septal-VSD<sub>pm</sub>, ASD, VSD<sub>muscular</sub>, except for PM<sub>2.5</sub>. VSD<sub>muscular</sub> were only collected in the first year of study when there was no available PM<sub>2.5</sub> data. <sup>b</sup>All results for the National Birth Defects Prevention Study population from 1997-2006, except for PM<sub>2.5</sub> which was 1999-2006 due to unavailability of monitoring data for PM<sub>2.5</sub> prior to 1999. <sup>c</sup>For ozone, the three categories of exposure were 25<sup>th</sup> to less than the 50<sup>th</sup> centile, 50<sup>th</sup> centile to less than the 75<sup>th</sup> centile, at or greater than the 75<sup>th</sup> centile, with the referent grouping being below the 25<sup>th</sup> centile.
